# Supplementary material for: Global Transcriptome Profile of the Oleaginous Yeast Saitozyma podzolica DSM 27192 Cultivated in Glucose and Xylose
Source: MDPI journal article supplement (doi:10.3390/jof7090758), 2021-09-15
Supplement: s1 [file s1]

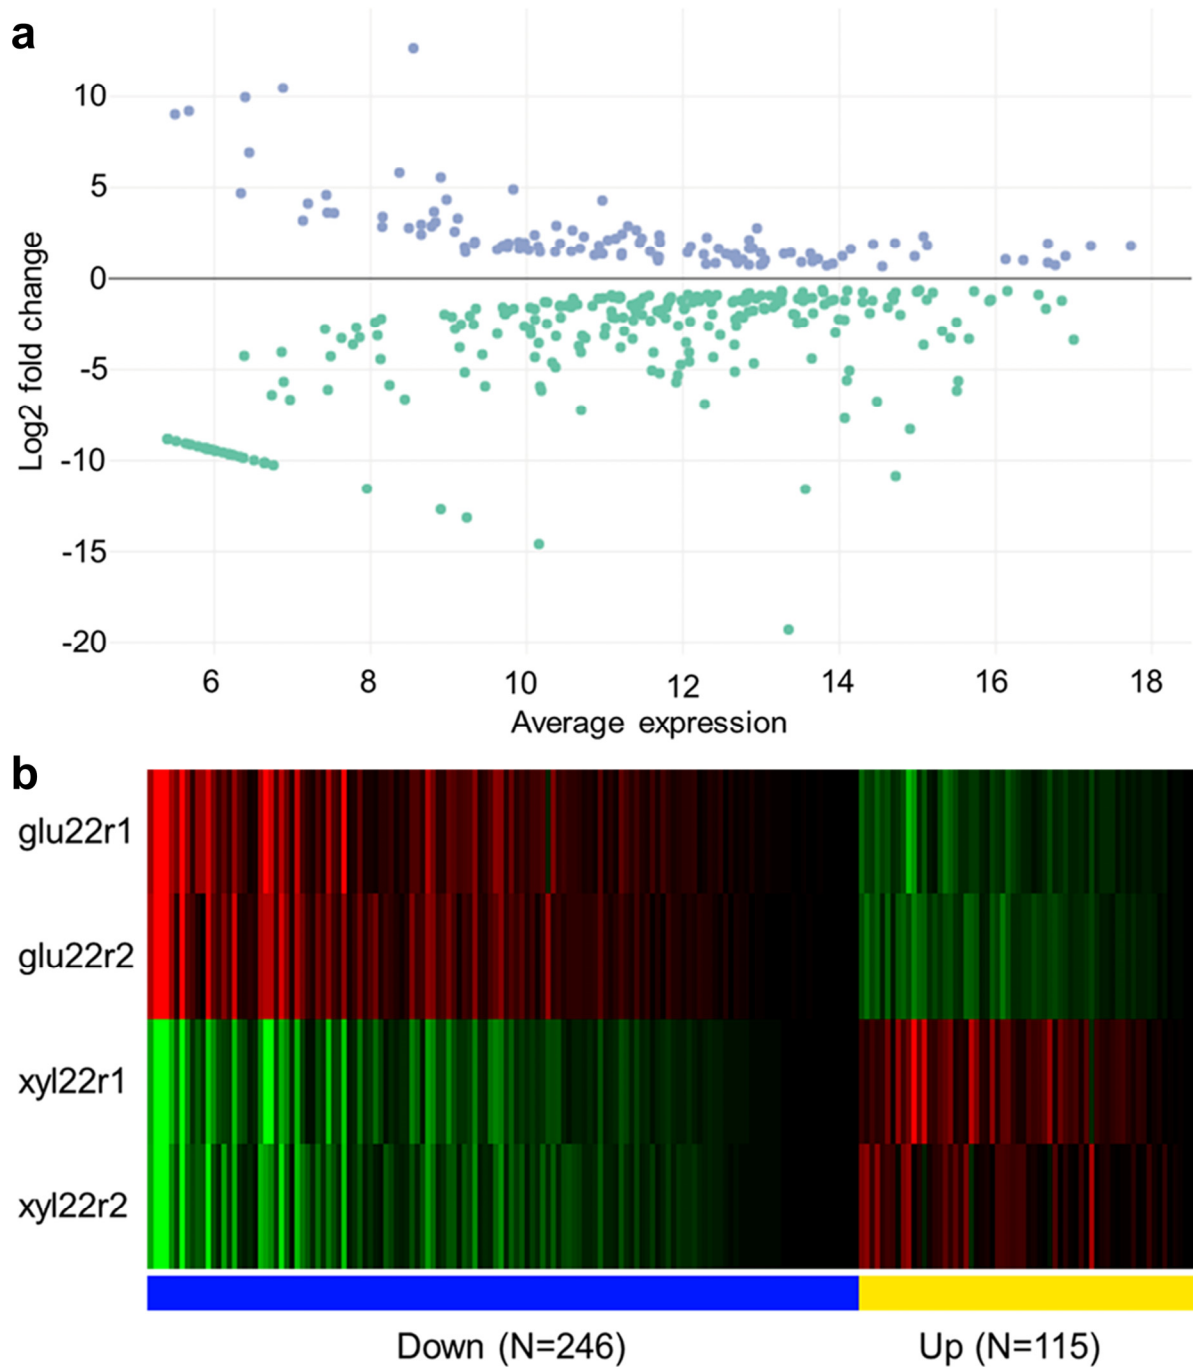

**Figure S1.** Differential gene expression during initial growth (22 h time point) of *Saitozyma podzolica* DSM 27192 on glucose compared to xylose. (a) MA plot showing log fold change ( $\log_2FC$ ) relative to mean gene expression values. (b) Heatmap showing pattern and number of differentially expressed genes title.
