# Supplementary material for: Global Transcriptome Profile of the Oleaginous Yeast Saitozyma podzolica DSM 27192 Cultivated in Glucose and Xylose
Source: J Fungi (Basel). 2021 Sep 15;7(9):758. doi: 10.3390/jof7090758 (PMC8466774; doi:10.3390/jof7090758)
Supplement: Supplementary file 1 [file jof-07-00758-s001.zip]

Archive with 4 entries (4 files):
- jof-1367483-figure S1.pdf
- Table S1.xlsx
- Table S2.xlsx
- Table S3.xlsx
