# Supplementary material for: Global Transcriptome Profile of the Oleaginous Yeast Saitozyma podzolica DSM 27192 Cultivated in Glucose and Xylose
Source: J Fungi (Basel). 2021 Sep 15;7(9):758. doi: 10.3390/jof7090758 (PMC8466774; doi:10.3390/jof7090758)
Supplement: Supplementary file 1 [file jof-07-00758-s001.zip › Table S1.xlsx]

## Sheet: Sheet1
Table S1. Differentially expressed transporter genes in Saitozyma podzolica DSM 27192 grown on glucose compared to xylose
DE	GO	Protein	Description	log2FC	FDR
Up	GO:0055085	EHS25_004977	Belongs to the major facilitator superfamily. Sugar transporter (TC 2.A.1.1) family	1.22	1e-08
	transmembrane	EHS25_007298	Fungal trichothecene efflux pump (TRI12)	1.5	0.00326
	transport	EHS25_002469	hypthtical protein (putative intracellular calcium activated chloride channel activity)	0.9	0.015
		EHS25_000632	Ion channel regulatory protein UNC-93	0.82	0.00926
		EHS25_001930	K+ potassium transporter	2.66	9.31e-05
		EHS25_004808	K+ potassium transporter	1.28	0.0224
		EHS25_004842	Major Facilitator Superfamily	3.67	0.0262
		EHS25_007458	Major Facilitator Superfamily	1.22	0.00295
		EHS25_000325	Major facilitator superfamily domain-containing protein	1.8	0.000283
		EHS25_000002	Sugar (and other) transporter	1.41	0.00271
		EHS25_007931	Sugar (and other) transporter	1.2	0.0139
		EHS25_008238	Sugar (and other) transporter	2	0.0401
		EHS25_009017	Sugar (and other) transporter	2.89	0.00423
		EHS25_005912	sugar transporter	2.32	1.12e-06
		EHS25_007346	Major Facilitator Superfamily	1.37	1.27e-06
Down	GO:0022857	EHS25_007397	ABC transporter	-1.42	0.00327
	transmembrane	EHS25_001355	ABC transporter transmembrane region	-0.88	0.00989
	transporter	EHS25_008153	ABC transporter transmembrane region	-0.68	0.0105
	activity	EHS25_007392	Alpha-amylase domain	-1.65	7.22e-06
		EHS25_001092	Bacteriorhodopsin-like protein	-1.13	0.0321
		EHS25_001351	Belongs to the major facilitator superfamily. Sugar transporter (TC 2.A.1.1) family	-1.44	0.0121
		EHS25_002168	Belongs to the major facilitator superfamily. Sugar transporter (TC 2.A.1.1) family	-2.9	1.44e-13
		EHS25_002284	Belongs to the major facilitator superfamily. Sugar transporter (TC 2.A.1.1) family	-4.89	4.76e-09
		EHS25_006731	Belongs to the major facilitator superfamily. Sugar transporter (TC 2.A.1.1) family	-4.74	5.12e-35
		EHS25_007017	Belongs to the major facilitator superfamily. Sugar transporter (TC 2.A.1.1) family	-3.56	8.66e-14
		EHS25_007116	Belongs to the major facilitator superfamily. Sugar transporter (TC 2.A.1.1) family	-1.79	1.71e-06
		EHS25_007263	Belongs to the major facilitator superfamily. Sugar transporter (TC 2.A.1.1) family	-9.86	0.000209
		EHS25_007291	Belongs to the major facilitator superfamily. Sugar transporter (TC 2.A.1.1) family	-4.62	4.64e-10
		EHS25_007411	Belongs to the major facilitator superfamily. Sugar transporter (TC 2.A.1.1) family	-4.33	3.17e-19
		EHS25_008211	Belongs to the major facilitator superfamily. Sugar transporter (TC 2.A.1.1) family	-1.1	0.0454
		EHS25_008625	Belongs to the mitochondrial carrier (TC 2.A.29) family	-1.16	0.000218
		EHS25_008709	Belongs to the mitochondrial carrier (TC 2.A.29) family	-0.9	0.0159
		EHS25_006329	Formate nitrite transporter	-2.53	0.00524
		EHS25_001103	Fungal trichothecene efflux pump (TRI12)	-1.21	1.02e-07
		EHS25_003919	General substrate transporter	-3.16	2.89e-20
		EHS25_009861	General substrate transporter	-9.34	0.00164
		EHS25_000057	glucose import	-11.59	1.35e-290
		EHS25_008439	Ion channel regulatory protein UNC-93	-1.96	0.000101
		EHS25_000952	L-fucose permease	-5.68	0.0202
		EHS25_000200	Major Facilitator Superfamily	-1.16	2.83e-05
		EHS25_000908	Major Facilitator Superfamily	-1.99	1.19e-05
		EHS25_002282	Major Facilitator Superfamily	-3.3	7.9e-27
		EHS25_002604	Major Facilitator Superfamily	-2.49	1.58e-08
		EHS25_002771	Major Facilitator Superfamily	-1.4	0.0212
		EHS25_006385	Major Facilitator Superfamily	-0.99	0.0353
		EHS25_006730	Major Facilitator Superfamily	-1.54	0.000307
		EHS25_008029	Major Facilitator Superfamily	-2.05	0.0363
		EHS25_008409	Major Facilitator Superfamily	-6.64	5.98e-05
		EHS25_009121	Major Facilitator Superfamily	-1.76	0.00798
		EHS25_008873	MFS general substrate transporter	-1.1	0.021
		EHS25_003679	Mitosis protein DIM1	-3.29	0.0187
		EHS25_008542	reductase	-1.32	0.00214
		EHS25_001021	Sugar (and other) transporter	-2.63	3.46e-08
		EHS25_001049	Sugar (and other) transporter	-9.14	0.00423
		EHS25_001332	Sugar (and other) transporter	-11.56	7.03e-10
		EHS25_002310	Sugar (and other) transporter	-4.18	1.8e-20
		EHS25_002417	Sugar (and other) transporter	-1.9	7.55e-18
		EHS25_004081	Sugar (and other) transporter	-2.53	1.12e-06
		EHS25_007388	Sugar (and other) transporter	-2.41	0.0281
		EHS25_009483	Sugar (and other) transporter	-10.26	1.62e-05
		EHS25_000641	sugar transporter	-9.07	0.00571
		EHS25_001591	Sugar transporter	-5.31	0.000268
		EHS25_003885	Sugar transporter	-3.63	0.00885
		EHS25_008491	sugar transporter	-12.69	5.74e-14
		EHS25_009194	Voltage-gated potassium channel beta-2 subunit	-1.24	1.84e-06
	GO:0004553	EHS25_009970	Plasma membrane	-1.22	0.000155
	hydrolase	EHS25_000627	Alpha-L-arabinofuranosidase C-terminus	-5.12	6.59e-61
	activity	EHS25_007109	Belongs to the glycosyl hydrolase 1 family	-2.47	9.75e-16
		EHS25_006032	Belongs to the glycosyl hydrolase 28 family	-2	9.57e-07
		EHS25_006440	Belongs to the glycosyl hydrolase 28 family	-1.08	0.00679
		EHS25_001590	Belongs to the glycosyl hydrolase 43 family	-2.16	3.13e-06
		EHS25_002283	Belongs to the glycosyl hydrolase 43 family	-6.91	7.59e-46
		EHS25_003990	Belongs to the glycosyl hydrolase 43 family	-9.32	0.00206
		EHS25_006471	Belongs to the glycosyl hydrolase 43 family	-6.16	1e-235
		EHS25_007253	Belongs to the glycosyl hydrolase 43 family	-2.41	4.56e-06
		EHS25_007385	Belongs to the glycosyl hydrolase 5 (cellulase A) family	-1.9	0.0117
		EHS25_007116	Belongs to the major facilitator superfamily. Sugar transporter (TC 2.A.1.1) family	-1.79	1.71e-06
		EHS25_003928	Beta-galactosidase	-10.12	2e-05
		EHS25_007786	glucan 1,4-alpha-glucosidase	-1.04	0.00832
		EHS25_000058	glucose import	-2.6	5.45e-13
		EHS25_009645	Glycosyl hydrolase family 1	-1.9	1.01e-17
		EHS25_004328	Glycosyl hydrolase family 10	-10.85	1.76e-301
		EHS25_004449	Glycosyl hydrolase family 10	-2.99	1.85e-31
		EHS25_003004	Major Facilitator Superfamily	-0.75	0.0363
		EHS25_000018	O-Glycosyl hydrolase family 30	-19.29	3.63e-37
		EHS25_007556	PA14 domain	-5.93	6.42e-10
		EHS25_008940	Ricin-type beta-trefoil	-9.99	7.36e-05
		EHS25_003736	Serine carboxypeptidase	-0.75	0.0185
		EHS25_000641	sugar transporter	-9.07	0.00571
	GO:0016052	EHS25_009911	Belongs to the glycosyl hydrolase 5 (cellulase A) family	-3.32	2.74e-34
	carbohydrate	EHS25_005852	Alcohol dehydrogenase GroES-like domain	-3.79	3.55e-31
	catabolic	EHS25_000627	Alpha-L-arabinofuranosidase C-terminus	-5.12	6.59e-61
	process	EHS25_005127	Fructose-bisphosphate aldolase class-II	-2.14	4.32e-07
		EHS25_007786	glucan 1,4-alpha-glucosidase	-1.04	0.00832
		EHS25_000058	glucose import	-2.6	5.45e-13
		EHS25_007499	Glycoside hydrolase family 115 protein	-1.06	0.000455
		EHS25_004328	Glycosyl hydrolase family 10	-10.85	1.76e-301
		EHS25_000018	O-Glycosyl hydrolase family 30	-19.29	3.63e-37
		EHS25_007556	PA14 domain	-5.93	6.42e-10
		EHS25_002309	Rhamnosidase B	-3.71	1.29e-07
	GO:0004181	EHS25_008536	FGGY family of carbohydrate kinases, C-terminal domain	-4.67	5.38e-37
	metallocarboxypep-	EHS25_005979	Carboxypeptidase s	-1.06	0.00423
	tidase activity	EHS25_007786	glucan 1,4-alpha-glucosidase	-1.04	0.00832
		EHS25_009679	Peptidase dimerisation domain	-1.17	0.0159
		EHS25_003246	Peptidase family M20/M25/M40	-0.86	0.00595
