# Supplementary material for: Global Transcriptome Profile of the Oleaginous Yeast Saitozyma podzolica DSM 27192 Cultivated in Glucose and Xylose
Source: J Fungi (Basel). 2021 Sep 15;7(9):758. doi: 10.3390/jof7090758 (PMC8466774; doi:10.3390/jof7090758)
Supplement: Supplementary file 1 [file jof-07-00758-s001.zip › Table S2.xlsx]

## Sheet: Sheet1
Table S2. Functional enrichment of differentially expressed genes during continous cultivation of Saitozyma podzolica DSM 27192 on glucose compared to xylose.
	Condition	GO	Protein	Description	log2FC	FDR
1	Glu_Xyl_46	GO:0022857	EHS25_007303	Amidase	3.81432	0.0176621
2		transmembrane transporter activity	EHS25_007115	Amino acid permease	2.89935	0.000104834
3			EHS25_006598	ATPase, P-type (transporting), HAD superfamily, subfamily IC	1.39318	4.63314e-07
4			EHS25_000005	Belongs to the major facilitator superfamily. Sugar transporter (TC 2.A.1.1) family	1.99229	0.0338185
5			EHS25_004507	Belongs to the major facilitator superfamily. Sugar transporter (TC 2.A.1.1) family	24.1212	2.67924e-07
6			EHS25_004977	Belongs to the major facilitator superfamily. Sugar transporter (TC 2.A.1.1) family	4.18387	0.000334849
7			EHS25_008400	Belongs to the mitochondrial carrier (TC 2.A.29) family	0.996375	1.00233e-05
8			EHS25_004848	Belongs to the NiCoT transporter (TC 2.A.52) family	2.54664	0.000199756
9			EHS25_009516	Belongs to the NiCoT transporter (TC 2.A.52) family	1.01663	0.0166143
10			EHS25_008018	Cation efflux family	0.776626	0.000102156
11			EHS25_000157	CDK-activating kinase assembly factor MAT1	0.776675	0.000212787
12			EHS25_009500	Extracellular tail, of 10TM putative phosphate transporter	0.961763	9.52206e-06
13			EHS25_004849	Ferroportin1 (FPN1)	1.20593	0.0155088
14			EHS25_007298	Fungal trichothecene efflux pump (TRI12)	2.43654	0.00624048
15			EHS25_008267	Fungal trichothecene efflux pump (TRI12)	1.50645	0.00287789
16			EHS25_006325	Glutathione peroxidase	0.889228	7.48571e-09
17			EHS25_006341	HEAT-like repeat	0.623026	0.0113318
18			EHS25_001930	K+ potassium transporter	3.2905	1.28228e-07
19			EHS25_001187	Major Facilitator Superfamily	4.50737	0.00141085
20			EHS25_001613	Major Facilitator Superfamily	10.833	8.21711e-09
21			EHS25_001939	Major Facilitator Superfamily	8.17863	0.0492557
22			EHS25_003746	Major Facilitator Superfamily	0.861629	0.0410107
23			EHS25_004842	Major Facilitator Superfamily	4.56594	0.00990376
24			EHS25_005632	Major Facilitator Superfamily	1.35375	0.00416513
25			EHS25_006244	Major Facilitator Superfamily	2.25823	0.00768007
26			EHS25_007458	Major Facilitator Superfamily	1.90279	0.000949229
27			EHS25_008575	Major Facilitator Superfamily	0.781948	0.0247748
28			EHS25_009871	Major Facilitator Superfamily	2.43158	0.0150537
29			EHS25_002276	Major facilitator superfamily transporter	1.98836	0.00365066
30			EHS25_005866	Major facilitator superfamily transporter	1.46752	0.0140504
31			EHS25_008213	MFS general substrate transporter	1.74338	0.00914903
32			EHS25_009878	MFS general substrate transporter	1.4964	0.0362662
33			EHS25_004530	OPT oligopeptide transporter protein	2.25536	0.00048765
34			EHS25_005756	Phytanoyl-CoA dioxygenase (PhyH)	1.72455	0.0321592
35			EHS25_003020	Protein phosphatase 2A homologues, catalytic domain.	0.63736	0.0352131
36			EHS25_008902	solute symporter	2.59526	0.00118058
37			EHS25_000002	Sugar (and other) transporter	3.0486	5.53397e-05
38			EHS25_007931	Sugar (and other) transporter	2.69203	0.000154643
39			EHS25_008093	Sugar (and other) transporter	2.72382	1.68748e-07
40			EHS25_008238	Sugar (and other) transporter	1.90105	0.0196305
41			EHS25_010162	Sugar (and other) transporter	0.866697	0.0456068
42			EHS25_005912	sugar transporter	1.71803	0.0178405
43			EHS25_007557	to rhamnosidase B	1.42026	4.47516e-05
44			EHS25_007346	to TIGR gene model, INSD accession	2.00959	0.00187681
45			EHS25_010221	to TIGR gene model, INSD accession	1.14133	0.0072719
46			EHS25_000325	to TIGR gene model, INSD accession AAW41474.1	2.97935	0.0203908
47			EHS25_004754	transporter	1.66525	0.0111585
48			EHS25_007282	Triose-phosphate Transporter family	10.5146	0.0143521
49			EHS25_003788	UAA transporter family	0.967032	0.0216569
50			EHS25_002596	VIT family	1.06513	0.0316566
51		GO:0046915	EHS25_000157	CDK-activating kinase assembly factor MAT1	0.776675	0.000212787
52		transition metal ion transmembrane transporter activity	EHS25_002596	VIT family	1.06513	0.0316566
53			EHS25_004848	Belongs to the NiCoT transporter (TC 2.A.52) family	2.54664	0.000199756
54			EHS25_004849	Ferroportin1 (FPN1)	1.20593	0.0155088
55			EHS25_007346	to TIGR gene model, INSD accession	2.00959	0.00187681
56			EHS25_009516	Belongs to the NiCoT transporter (TC 2.A.52) family	1.01663	0.0166143
57			EHS25_010221	to TIGR gene model, INSD accession	1.14133	0.0072719
58	Down	GO:0004553	EHS25_001891	Alpha mannosidase, middle domain	-6.58293	0.0190767
59		hydrolase activity, hydrolyzing O-glycosyl compounds	EHS25_004939	Alpha mannosidase, middle domain	-0.917387	6.36712e-05
60			EHS25_004449	alpha,alpha-trehalase activity	-4.1377	2.77652e-16
61			EHS25_001095	Alpha-amylase domain	-1.45569	0.000635899
62			EHS25_000627	Alpha-L-arabinofuranosidase C-terminus	-5.33784	8.26552e-88
63			EHS25_001035	Alpha-L-rhamnosidase	-4.12354	5.24731e-06
64			EHS25_007251	Alpha-L-rhamnosidase	-1.47511	0.0202837
65			EHS25_008989	Alpha-L-rhamnosidase	-3.8213	0.0103695
66			EHS25_002131	Amidase	-1.5508	3.07334e-05
67			EHS25_007109	Belongs to the glycosyl hydrolase 1 family	-2.55171	4.61136e-23
68			EHS25_010163	Belongs to the glycosyl hydrolase 1 family	-10.9918	2.32556e-09
69			EHS25_006837	Belongs to the glycosyl hydrolase 18 family	-2.10021	0.0048811
70			EHS25_003923	Belongs to the glycosyl hydrolase 2 family	-5.549	0.0111585
71			EHS25_005849	Belongs to the glycosyl hydrolase 2 family	-4.48879	0.0125195
72			EHS25_008977	Belongs to the glycosyl hydrolase 2 family	-0.866615	0.0076957
73			EHS25_002375	Belongs to the glycosyl hydrolase 28 family	-1.12662	0.0105482
74			EHS25_006032	Belongs to the glycosyl hydrolase 28 family	-2.06042	8.54656e-07
75			EHS25_002283	Belongs to the glycosyl hydrolase 43 family	-6.76077	8.03993e-51
76			EHS25_006471	Belongs to the glycosyl hydrolase 43 family	-6.3889	0
77			EHS25_007253	Belongs to the glycosyl hydrolase 43 family	-1.60486	2.04731e-07
78			EHS25_007385	Belongs to the glycosyl hydrolase 5 (cellulase A) family	-1.3153	0.00776709
79			EHS25_009911	Belongs to the glycosyl hydrolase 5 (cellulase A) family	-3.517	7.53336e-64
80			EHS25_007116	Belongs to the major facilitator superfamily. Sugar transporter (TC 2.A.1.1) family	-3.16104	0.00696236
81			EHS25_003928	Beta-galactosidase	-9.06207	4.49803e-05
82			EHS25_002775	Catalyzes the NAD( )-dependent oxidation of formate to carbon dioxide. Formate oxidation is the final step in the methanol oxidation pathway in methylotrophic microorganisms. Has a role in the detoxification of exogenous formate in non- methylotrophic organisms	-3.00922	0.00100388
83			EHS25_003099	Catalyzes the NAD( )-dependent oxidation of formate to carbon dioxide. Formate oxidation is the final step in the methanol oxidation pathway in methylotrophic microorganisms. Has a role in the detoxification of exogenous formate in non- methylotrophic organisms	-1.77735	0.00243893
84			EHS25_001410	CFEM domain	-2.55194	0.0109764
85			EHS25_003041	Fibronectin type III-like domain	-0.613846	0.0228729
86			EHS25_000093	Galactose mutarotase-like	-10.4507	4.554e-06
87			EHS25_002957	Galactose mutarotase-like	-10.549	7.61358e-08
88			EHS25_007786	glucan 1,4-alpha-glucosidase	-2.27221	7.73464e-11
89			EHS25_000058	glucose import	-3.36186	2.54477e-23
90			EHS25_009367	Glycosyl hydrolase	-1.04377	0.00242046
91			EHS25_004328	Glycosyl hydrolase family 10	-10.0689	2.37176e-31
92			EHS25_000766	Hydrolyzes a variety of simple alpha-D-galactoside as well as more complex molecules such as oligosaccharides and polysaccharides	-2.06933	4.33478e-08
93			EHS25_005995	Insulinase (Peptidase family M16)	-0.938173	0.000793806
94			EHS25_006381	mannosyl-oligosaccharide 1,2-alpha-mannosidase activity	-1.06139	0.0102563
95			EHS25_000018	O-Glycosyl hydrolase family 30	-18.6198	1.94083e-34
96			EHS25_002620	PA14 domain	-11.0857	9.90096e-10
97			EHS25_008940	Ricin-type beta-trefoil	-10.3678	1.63638e-05
98		GO:0022857	EHS25_007887	ABC transporter transmembrane region	-9.18191	3.83926e-07
99		transmembrane transporter activity	EHS25_006864	ABC transporter transmembrane region 2	-0.792529	0.0229039
100			EHS25_008157	ABC transporter transmembrane region 2	-0.684588	0.00121155
101			EHS25_007392	Alpha-amylase domain	-0.921299	0.00838095
102			EHS25_007251	Alpha-L-rhamnosidase	-1.47511	0.0202837
103			EHS25_003798	Amino acid permease	-8.06314	0.00800797
104			EHS25_005849	Belongs to the glycosyl hydrolase 2 family	-4.48879	0.0125195
105			EHS25_000015	Belongs to the major facilitator superfamily. Sugar transporter (TC 2.A.1.1) family	-10.401	0.000402281
106			EHS25_000581	Belongs to the major facilitator superfamily. Sugar transporter (TC 2.A.1.1) family	-7.73514	0.00524225
107			EHS25_001188	Belongs to the major facilitator superfamily. Sugar transporter (TC 2.A.1.1) family	-4.27135	0.00329831
108			EHS25_002168	Belongs to the major facilitator superfamily. Sugar transporter (TC 2.A.1.1) family	-4.33747	4.41001e-12
109			EHS25_002284	Belongs to the major facilitator superfamily. Sugar transporter (TC 2.A.1.1) family	-7.43704	1.50104e-28
110			EHS25_002306	Belongs to the major facilitator superfamily. Sugar transporter (TC 2.A.1.1) family	-2.07968	0.0024154
111			EHS25_002800	Belongs to the major facilitator superfamily. Sugar transporter (TC 2.A.1.1) family	-4.40636	0.0324929
112			EHS25_003551	Belongs to the major facilitator superfamily. Sugar transporter (TC 2.A.1.1) family	-8.34967	0.022115
113			EHS25_003559	Belongs to the major facilitator superfamily. Sugar transporter (TC 2.A.1.1) family	-0.887805	0.000454453
114			EHS25_005409	Belongs to the major facilitator superfamily. Sugar transporter (TC 2.A.1.1) family	-8.28204	0.00797035
115			EHS25_006731	Belongs to the major facilitator superfamily. Sugar transporter (TC 2.A.1.1) family	-4.08112	0.0018577
116			EHS25_007017	Belongs to the major facilitator superfamily. Sugar transporter (TC 2.A.1.1) family	-10.294	1.68748e-07
117			EHS25_007056	Belongs to the major facilitator superfamily. Sugar transporter (TC 2.A.1.1) family	-0.693239	0.00306962
118			EHS25_007116	Belongs to the major facilitator superfamily. Sugar transporter (TC 2.A.1.1) family	-3.16104	0.00696236
119			EHS25_007291	Belongs to the major facilitator superfamily. Sugar transporter (TC 2.A.1.1) family	-5.20611	2.54477e-23
120			EHS25_007969	Belongs to the major facilitator superfamily. Sugar transporter (TC 2.A.1.1) family	-1.54559	0.00779525
121			EHS25_008130	Belongs to the major facilitator superfamily. Sugar transporter (TC 2.A.1.1) family	-8.94748	0.000138565
122			EHS25_009069	Belongs to the major facilitator superfamily. Sugar transporter (TC 2.A.1.1) family	-4.5172	0.000840445
123			EHS25_008295	Belongs to the MIP aquaporin (TC 1.A.8) family	-1.52329	0.0346659
124			EHS25_005184	Belongs to the mitochondrial carrier (TC 2.A.29) family	-0.662315	0.0424529
125			EHS25_007717	Belongs to the mitochondrial carrier (TC 2.A.29) family	-3.80263	0.0275614
126			EHS25_008625	Belongs to the mitochondrial carrier (TC 2.A.29) family	-1.47281	0.000126273
127			EHS25_008709	Belongs to the mitochondrial carrier (TC 2.A.29) family	-1.17395	1.90998e-06
128			EHS25_005457	Catalyzes the epimerization of the S- and R-forms of NAD(P)HX, a damaged form of NAD(P)H that is a result of enzymatic or heat-dependent hydration. This is a prerequisite for the S- specific NAD(P)H-hydrate dehydratase to allow the repair of both epimers of NAD(P)HX	-1.25309	8.34693e-05
129			EHS25_005841	choline transport protein	-10.6248	3.24988e-10
130			EHS25_005073	CobW/HypB/UreG, nucleotide-binding domain	-0.933159	0.010023
131			EHS25_003536	Cytosolic domain of 10TM putative phosphate transporter	-0.754113	0.00731482
132			EHS25_000847	Fungal trichothecene efflux pump (TRI12)	-4.91353	0.0132312
133			EHS25_001103	Fungal trichothecene efflux pump (TRI12)	-1.00779	0.0268417
134			EHS25_003919	General substrate transporter	-3.14822	7.07662e-06
135			EHS25_008877	General substrate transporter	-2.8896	0.000871667
136			EHS25_009050	General substrate transporter	-7.53894	0.010823
137			EHS25_009861	General substrate transporter	-8.80479	0.00720895
138			EHS25_000057	glucose import	-18.3261	1.99626e-17
139			EHS25_008384	Ion channel regulatory protein UNC-93	-3.48415	0.0335558
140			EHS25_004132	L-fucose permease	-0.942557	0.000609448
141			EHS25_000173	Major Facilitator Superfamily	-11.7958	2.72878e-10
142			EHS25_000200	Major Facilitator Superfamily	-1.02063	0.0112084
143			EHS25_000889	Major Facilitator Superfamily	-7.21686	0.0373392
144			EHS25_002604	Major Facilitator Superfamily	-3.66386	0.047465
145			EHS25_002686	Major Facilitator Superfamily	-2.52581	0.00491313
146			EHS25_002771	Major Facilitator Superfamily	-1.89685	0.00398136
147			EHS25_004657	Major Facilitator Superfamily	-6.93645	6.43652e-06
148			EHS25_004708	Major Facilitator Superfamily	-4.18882	0.0208405
149			EHS25_005126	Major Facilitator Superfamily	-2.20572	0.00866567
150			EHS25_006385	Major Facilitator Superfamily	-1.08804	0.0178405
151			EHS25_006730	Major Facilitator Superfamily	-2.23408	0.00473347
152			EHS25_007029	Major Facilitator Superfamily	-7.63376	0.0460907
153			EHS25_008409	Major Facilitator Superfamily	-3.90679	0.0377336
154			EHS25_008490	Major Facilitator Superfamily	-1.11705	0.0372629
155			EHS25_009404	Major Facilitator Superfamily	-1.30399	0.0332459
156			EHS25_003679	Mitosis protein DIM1	-2.36305	0.00121755
157			EHS25_007398	OPT oligopeptide transporter protein	-9.82347	0.00380946
158			EHS25_002620	PA14 domain	-11.0857	9.90096e-10
159			EHS25_007461	Permease family	-8.22923	0.000402281
160			EHS25_001005	Permease for cytosine/purines, uracil, thiamine, allantoin	-5.87846	0.00723779
161			EHS25_008542	reductase	-0.849365	0.0140615
162			EHS25_000862	Sugar (and other) transporter	-7.76755	0.0312855
163			EHS25_001332	Sugar (and other) transporter	-5.60952	0.000546741
164			EHS25_001344	Sugar (and other) transporter	-7.33715	0.00134943
165			EHS25_001348	Sugar (and other) transporter	-10.4833	5.76717e-08
166			EHS25_001857	Sugar (and other) transporter	-8.5138	0.00931835
167			EHS25_002417	Sugar (and other) transporter	-1.28183	0.000660372
168			EHS25_003870	Sugar (and other) transporter	-9.25273	0.000883993
169			EHS25_004002	Sugar (and other) transporter	-10.821	8.56167e-08
170			EHS25_004081	Sugar (and other) transporter	-2.99921	0.0333582
171			EHS25_007030	Sugar (and other) transporter	-8.40725	5.08546e-05
172			EHS25_007130	Sugar (and other) transporter	-8.16483	0.0205878
173			EHS25_007388	Sugar (and other) transporter	-5.12193	0.0113936
174			EHS25_007409	Sugar (and other) transporter	-9.33803	5.84087e-06
175			EHS25_007524	Sugar (and other) transporter	-0.676794	0.048351
176			EHS25_008657	Sugar (and other) transporter	-10.068	1.43227e-07
177			EHS25_009013	Sugar (and other) transporter	-2.49853	0.0014036
178			EHS25_009483	Sugar (and other) transporter	-9.49372	0.0156842
179			EHS25_001591	Sugar transporter	-5.04047	3.95508e-11
180			EHS25_003885	Sugar transporter	-10.5902	3.65838e-07
181			EHS25_008491	sugar transporter	-11.3257	1.05231e-10
182			EHS25_004564	Sulfate permease family	-1.27478	0.0049866
183			EHS25_001473	The coatomer is a cytosolic protein complex that binds to dilysine motifs and reversibly associates with Golgi non- clathrin-coated vesicles, which further mediate biosynthetic protein transport from the ER, via the Golgi up to the trans Golgi network. Coatomer complex is required for budding from Golgi membranes, and is essential for the retrograde Golgi-to-ER transport of dilysine-tagged protei…	-0.612381	0.0456065
184			EHS25_009194	Voltage-gated potassium channel beta-2 subunit	-1.55513	2.86831e-09
185		GO:0045333	EHS25_009499	2-oxoacid dehydrogenases acyltransferase (catalytic domain)	-0.978671	0.000983393
186		cellular respiration	EHS25_004286	2-oxoglutarate dehydrogenase C-terminal	-1.5536	0.000403955
187			EHS25_002479	Belongs to the aconitase IPM isomerase family	-1.27798	0.000140765
188			EHS25_009470	Belongs to the complex I 75 kDa subunit family	-1.1506	0.000594759
189			EHS25_002130	Belongs to the isocitrate lyase PEP mutase superfamily. Isocitrate lyase family	-5.6299	0.000719862
190			EHS25_002824	Belongs to the isocitrate lyase PEP mutase superfamily. Isocitrate lyase family	-2.52359	0.0366618
191			EHS25_003055	Catalyzes the formation of phosphatidylethanolamine (PtdEtn) from phosphatidylserine (PtdSer). Plays a central role in phospholipid metabolism and in the interorganelle trafficking of phosphatidylserine	-0.709858	0.0229456
192			EHS25_009438	CybS, succinate dehydrogenase cytochrome B small subunit	-0.980111	0.0202807
193			EHS25_005145	Electron transfer flavoprotein-ubiquinone oxidoreductase, 4Fe-4S	-1.45439	0.0105939
194			EHS25_007586	Iron-sulfur protein (IP) subunit of succinate dehydrogenase (SDH) that is involved in complex II of the mitochondrial electron transport chain and is responsible for transferring electrons from succinate to ubiquinone (coenzyme Q)	-0.885909	0.00189156
195			EHS25_003162	Succinate dehydrogenase/Fumarate reductase transmembrane subunit	-1.63369	6.01746e-06
196			EHS25_006046	Succinyl-CoA synthetase functions in the citric acid cycle (TCA), coupling the hydrolysis of succinyl-CoA to the synthesis of ATP and thus represents the only step of substrate- level phosphorylation in the TCA. The beta subunit provides nucleotide specificity of the enzyme and binds the substrate succinate, while the binding sites for coenzyme A and phosphate are found in the alpha subunit	-0.764936	0.0498269
197			EHS25_000456	Ubiquinol-cytochrome C reductase hinge protein	-1.51304	0.00246603
198	Glu_Xyl_70	GO:0004553	EHS25_004449	alpha,alpha-trehalase activity	-3.13761	3.37442e-09
199		hydrolase activity, hydrolyzing O-glycosyl compounds	EHS25_000627	Alpha-L-arabinofuranosidase C-terminus	-4.09996	3.35075e-52
200			EHS25_001035	Alpha-L-rhamnosidase	-2.28973	0.0399654
201			EHS25_002131	Amidase	-1.91535	8.4432e-08
202			EHS25_007759	Belongs to the cysteine synthase cystathionine beta- synthase family	-1.02293	2.02396e-06
203			EHS25_007109	Belongs to the glycosyl hydrolase 1 family	-2.43953	5.84924e-21
204			EHS25_003923	Belongs to the glycosyl hydrolase 2 family	-9.98655	0.000124665
205			EHS25_006032	Belongs to the glycosyl hydrolase 28 family	-1.76259	7.23405e-05
206			EHS25_002283	Belongs to the glycosyl hydrolase 43 family	-6.11852	4.85453e-42
207			EHS25_006471	Belongs to the glycosyl hydrolase 43 family	-6.28251	0
208			EHS25_007253	Belongs to the glycosyl hydrolase 43 family	-1.82003	2.56558e-09
209			EHS25_000337	Belongs to the glycosyl hydrolase 5 (cellulase A) family	-9.98488	2.11092e-14
210			EHS25_007385	Belongs to the glycosyl hydrolase 5 (cellulase A) family	-2.4385	2.13981e-08
211			EHS25_009911	Belongs to the glycosyl hydrolase 5 (cellulase A) family	-4.41188	1.32206e-100
212			EHS25_003928	Beta-galactosidase	-11.3684	1.12484e-07
213			EHS25_000576	Cellulase (glycosyl hydrolase family 5)	-0.972076	0.0356027
214			EHS25_002957	Galactose mutarotase-like	-3.6778	0.003435
215			EHS25_009962	Glucan 1,3 beta-glucosidase protein	-0.995569	0.000812425
216			EHS25_000058	glucose import	-1.43012	0.000332157
217			EHS25_009367	Glycosyl hydrolase	-1.1738	0.000675181
218			EHS25_004328	Glycosyl hydrolase family 10	-10.7621	1.28912e-35
219			EHS25_004608	Glycosyl hydrolase family 9	-1.07993	1.07147e-06
220			EHS25_003004	hydrolase activity, hydrolyzing O-glycosyl compounds	-0.771931	0.0227457
221			EHS25_006381	mannosyl-oligosaccharide 1,2-alpha-mannosidase activity	-1.45582	0.000237177
222			EHS25_000018	O-Glycosyl hydrolase family 30	-15.6842	2.79108e-92
223			EHS25_007556	PA14 domain	-6.69959	0.0260497
224			EHS25_008940	Ricin-type beta-trefoil	-8.68137	0.000869004
225			EHS25_003736	Serine carboxypeptidase	-0.677158	0.000515064
226		GO:0044262	EHS25_000058	glucose import	-1.43012	0.000332157
227		cellular carbohydrate metabolic process	EHS25_005852	Alcohol dehydrogenase GroES-like domain	-3.81732	5.11318e-09
228			EHS25_004449	alpha,alpha-trehalase activity	-3.13761	3.37442e-09
229			EHS25_001547	Belongs to the TRAFAC class myosin-kinesin ATPase superfamily. Myosin family	-0.806669	0.00255213
230			EHS25_007916	Catalyzes the conversion of GlcNAc-6-P into GlcNAc-1-P during the synthesis of uridine diphosphate UDP-GlcNAc, which is a biosynthetic precursor of chitin and also supplies the amino sugars for N-linked oligosaccharides of glycoproteins	-0.630017	0.0165138
231			EHS25_005284	chitin synthase	-0.705586	0.00372128
232			EHS25_008536	FGGY family of carbohydrate kinases, C-terminal domain	-3.96599	2.64959e-18
233			EHS25_005127	Fructose-bisphosphate aldolase class-II	-2.35806	2.2974e-16
234			EHS25_004608	Glycosyl hydrolase family 9	-1.07993	1.07147e-06
235			EHS25_007556	PA14 domain	-6.69959	0.0260497
236			EHS25_000575	Splits internally a 1,3-beta-glucan molecule and transfers the newly generated reducing end (the donor) to the non- reducing end of another 1,3-beta-glucan molecule (the acceptor) forming a 1,3-beta linkage, resulting in the elongation of 1,3- beta-glucan chains in the cell wall	-0.965333	2.2551e-06
237		GO:0010383	EHS25_001547	Belongs to the TRAFAC class myosin-kinesin ATPase superfamily. Myosin family	-0.806669	0.00255213
238		cell wall polysaccharide metabolic process	EHS25_007916	Catalyzes the conversion of GlcNAc-6-P into GlcNAc-1-P during the synthesis of uridine diphosphate UDP-GlcNAc, which is a biosynthetic precursor of chitin and also supplies the amino sugars for N-linked oligosaccharides of glycoproteins	-0.630017	0.0165138
239			EHS25_005284	chitin synthase	-0.705586	0.00372128
240			EHS25_004328	Glycosyl hydrolase family 10	-10.7621	1.28912e-35
241			EHS25_000018	O-Glycosyl hydrolase family 30	-15.6842	2.79108e-92
242			EHS25_000575	Splits internally a 1,3-beta-glucan molecule and transfers the newly generated reducing end (the donor) to the non- reducing end of another 1,3-beta-glucan molecule (the acceptor) forming a 1,3-beta linkage, resulting in the elongation of 1,3- beta-glucan chains in the cell wall	-0.965333	2.2551e-06
243	Glu_Xyl_120	GO:0004553	EHS25_004449	alpha,alpha-trehalase activity	-2.57968	4.67162e-06
244		hydrolase activity, hydrolyzing O-glycosyl compounds	EHS25_000627	Alpha-L-arabinofuranosidase C-terminus	-2.9908	1.89319e-27
245			EHS25_007252	Alpha-L-rhamnosidase	-0.826837	0.0272728
246			EHS25_002131	Amidase	-1.28046	0.0021983
247			EHS25_007039	Bacterial alpha-L-rhamnosidase C-terminal domain	-4.13189	0.0343521
248			EHS25_007109	Belongs to the glycosyl hydrolase 1 family	-2.28665	2.91159e-18
249			EHS25_003923	Belongs to the glycosyl hydrolase 2 family	-11.3175	9.1485e-06
250			EHS25_002283	Belongs to the glycosyl hydrolase 43 family	-5.5513	2.79109e-34
251			EHS25_003990	Belongs to the glycosyl hydrolase 43 family	-10.91	0.0297115
252			EHS25_006471	Belongs to the glycosyl hydrolase 43 family	-6.01221	0
253			EHS25_007253	Belongs to the glycosyl hydrolase 43 family	-2.17211	2.92431e-13
254			EHS25_000337	Belongs to the glycosyl hydrolase 5 (cellulase A) family	-4.8826	3.92225e-05
255			EHS25_009911	Belongs to the glycosyl hydrolase 5 (cellulase A) family	-3.17392	1.21162e-51
256			EHS25_003928	Beta-galactosidase	-11.8211	3.61888e-08
257			EHS25_002957	Galactose mutarotase-like	-3.38162	0.01163
258			EHS25_000058	glucose import	-1.62625	3.05145e-05
259			EHS25_004328	Glycosyl hydrolase family 10	-13.7573	2.83565e-51
260			EHS25_006381	mannosyl-oligosaccharide 1,2-alpha-mannosidase activity	-1.07771	0.0184122
261			EHS25_000018	O-Glycosyl hydrolase family 30	-17.7286	4.53953e-31
262			EHS25_007556	PA14 domain	-26.3814	4.52097e-23
263			EHS25_008940	Ricin-type beta-trefoil	-11.0039	7.59113e-06
264	Glu_46_70	GO:0044446	EHS25_000556	1,3-beta-glucan synthase subunit FKS1	1.25603	1.264e-09
265		intracellular organelle part	EHS25_005499	2OG-Fe(II) oxygenase superfamily	0.823748	2.74778e-05
266			EHS25_001475	3' exoribonuclease family, domain 1	0.899842	0.0422388
267			EHS25_007732	3-oxo-5-alpha-steroid 4-dehydrogenase	1.25971	1.64084e-12
268			EHS25_007601	AAA domain (dynein-related subfamily)	2.18044	4.83612e-10
269			EHS25_008153	ABC transporter transmembrane region	0.7227	0.000506205
270			EHS25_003141	Accessory subunit of the mitochondrial membrane respiratory chain NADH dehydrogenase (Complex I), that is believed not to be involved in catalysis. Complex I functions in the transfer of electrons from NADH to the respiratory chain. The immediate electron acceptor for the enzyme is believed to be ubiquinone	0.717222	0.0313952
271			EHS25_009125	acetyltransferase, which acetylates the inositol ring of phosphatidylinositol during biosynthesis of GPI- anchor	0.605291	0.0396075
272			EHS25_008173	Acid phosphatase homologues	1.57396	0.000687376
273			EHS25_005972	Adaptins are components of the adaptor complexes which link clathrin to receptors in coated vesicles. Clathrin-associated protein complexes are believed to interact with the cytoplasmic tails of membrane proteins, leading to their selection and concentration	0.586974	0.00804741
274			EHS25_002548	Adds the first Dol-P-Man derived mannose in an alpha-1,3 linkage to Man(5)GlcNAc(2)-PP-Dol	0.823387	0.000182738
275			EHS25_006637	ALG6, ALG8 glycosyltransferase family	0.966578	0.00131017
276			EHS25_000136	Alg9-like mannosyltransferase family	1.16664	2.02255e-06
277			EHS25_008367	Alg9-like mannosyltransferase family	0.71743	0.00201384
278			EHS25_000988	alpha-1,6-mannosylglycoprotein 6-beta-N-acetylglucosaminyltransferase activity	0.849274	0.00107896
279			EHS25_008302	arm repeat-containing protein	1.09173	1.11367e-07
280			EHS25_002634	ATP synthase subunit H	1.47702	0.00209094
281			EHS25_006639	Belongs to the AAA ATPase family	0.615559	0.000585515
282			EHS25_000332	Belongs to the adaptor complexes small subunit family	0.765842	0.00454607
283			EHS25_009358	Belongs to the Ca(2 ) cation antiporter (CaCA) (TC 2.A.19) family	1.3817	7.33414e-08
284			EHS25_003134	Belongs to the cation transport ATPase (P-type) (TC 3.A.3) family. Type IV subfamily	1.63246	8.01398e-10
285			EHS25_010236	Belongs to the cation transport ATPase (P-type) (TC 3.A.3) family. Type IV subfamily	0.86773	0.000589779
286			EHS25_005497	Belongs to the CDS family	0.791656	4.09505e-07
287			EHS25_004346	Belongs to the complex I LYR family	1.29268	6.1992e-07
288			EHS25_002056	Belongs to the DHHC palmitoyltransferase family	0.691275	0.000830233
289			EHS25_007572	Belongs to the FPP GGPP synthase family	0.842177	3.75465e-06
290			EHS25_003003	Belongs to the glycosyl hydrolase 5 (cellulase A) family	1.02345	0.00242906
291			EHS25_001037	Belongs to the mitochondrial carrier (TC 2.A.29) family	2.52123	6.8659e-05
292			EHS25_003447	Belongs to the mitochondrial carrier (TC 2.A.29) family	1.17716	2.66115e-05
293			EHS25_008400	Belongs to the mitochondrial carrier (TC 2.A.29) family	1.50764	4.00915e-13
294			EHS25_008625	Belongs to the mitochondrial carrier (TC 2.A.29) family	1.43376	6.58087e-05
295			EHS25_010131	Belongs to the monovalent cation proton antiporter 1 (CPA1) transporter (TC 2.A.36) family	0.904136	8.93718e-08
296			EHS25_000468	Belongs to the phosphatase 2A regulatory subunit B family	0.882945	0.000878572
297			EHS25_010075	Belongs to the protein kinase superfamily. RIO-type Ser Thr kinase family	0.796536	0.000503447
298			EHS25_000208	Belongs to the small Tim family	0.792529	0.020968
299			EHS25_005246	Belongs to the sterol desaturase family	0.905495	0.00120887
300			EHS25_010286	Belongs to the synaptobrevin family	1.2391	9.68124e-08
301			EHS25_001547	Belongs to the TRAFAC class myosin-kinesin ATPase superfamily. Myosin family	1.12647	5.26639e-07
302			EHS25_002897	Belongs to the universal ribosomal protein uL1 family	1.31202	3.12404e-07
303			EHS25_009590	Belongs to the universal ribosomal protein uL15 family	1.0219	0.00118187
304			EHS25_009776	Belongs to the universal ribosomal protein uS12 family	0.836266	0.00915103
305			EHS25_001267	Belongs to the universal ribosomal protein uS19 family	1.86335	1.20472e-11
306			EHS25_000150	Brix	0.992954	1.2571e-10
307			EHS25_004405	Brix	0.907255	7.82003e-08
308			EHS25_010214	Bystin	0.637433	0.0460759
309			EHS25_001456	CAAX prenyl protease N-terminal, five membrane helices	1.43449	2.22453e-10
310			EHS25_009577	CAP_GLY	1.03437	3.34396e-05
311			EHS25_006624	Carbon utilization by utilization of organic compounds-related protein	1.11415	0.00104553
312			EHS25_008530	Catalytic component of the signal peptidase complex (SPC), which catalyzes the cleavage of N-terminal signal sequences of proteins targeted to the endoplasmic reticulum. Signal peptide cleavage occurs during the translocation (cotranslationally or post-translationally) through the translocon pore into the endoplasmic reticulum	0.770613	0.000162299
313			EHS25_007911	Catalyzes the hydrolysis of inorganic polyphosphate (polyP) chains of many hundreds of phosphate residues into shorter lengths	1.2341	6.23488e-07
314			EHS25_001667	Catalyzes the hydroxylation of 2-polyprenyl-3-methyl-6- methoxy-1,4-benzoquinol (DMQH2) during ubiquinone biosynthesis. Has also a structural role in the COQ enzyme complex, stabilizing other COQ polypeptides	1.0641	1.46553e-05
315			EHS25_004321	Catalyzes the prenylation of para-hydroxybenzoate (PHB) with an all-trans polyprenyl group. Mediates the second step in the final reaction sequence of coenzyme Q (CoQ) biosynthesis, which is the condensation of the polyisoprenoid side chain with PHB, generating the first membrane-bound Q intermediate	0.896883	0.000381663
316			EHS25_000157	CDK-activating kinase assembly factor MAT1	0.861725	7.79277e-06
317			EHS25_004569	CDP-alcohol phosphatidyltransferase	0.696395	0.0176848
318			EHS25_009344	chiasma assembly	1.06263	0.0408583
319			EHS25_001016	chitin synthase	1.77557	4.04866e-14
320			EHS25_003093	Chitin synthase	1.42178	0.000137995
321			EHS25_005284	chitin synthase	1.28449	9.92143e-11
322			EHS25_009252	ciliary basal body	1.04819	0.000807815
323			EHS25_002735	Clathrin is the major protein of the polyhedral coat of coated pits and vesicles	0.918	4.08237e-05
324			EHS25_002451	component of the eukaryotic translation initiation factor 3 (eIF-3) complex, which is involved in protein synthesis of a specialized repertoire of mRNAs and, together with other initiation factors, stimulates binding of mRNA and methionyl-tRNAi to the 40S ribosome. The eIF-3 complex specifically targets and initiates translation of a subset of mRNAs involved in cell proliferation	1.13913	1.55557e-08
325			EHS25_009956	Component of the Mediator complex, a coactivator involved in the regulated transcription of nearly all RNA polymerase II-dependent genes. Mediator functions as a bridge to convey information from gene-specific regulatory proteins to the basal RNA polymerase II transcription machinery. Mediator is recruited to promoters by direct interactions with regulatory proteins and serves as a scaffold for t…	1.47995	0.000123947
326			EHS25_009955	Component of the NOP7 complex, which is required for maturation of the 25S and 5.8S ribosomal RNAs and formation of the 60S ribosome	0.745395	0.0212522
327			EHS25_006763	Component of the ribosome assembly machinery. Nuclear paralog of the ribosomal protein P0, it binds pre-60S subunits at an early stage of assembly in the nucleolus, and is replaced by P0 in cytoplasmic pre-60S subunits and mature 80S ribosomes	0.706644	0.00721153
328			EHS25_007365	Core subunit of the mitochondrial membrane respiratory chain NADH dehydrogenase (Complex I) that is believed to belong to the minimal assembly required for catalysis. Complex I functions in the transfer of electrons from NADH to the respiratory chain. The immediate electron acceptor for the enzyme is believed to be ubiquinone	2.62486	0.00039713
329			EHS25_010002	Cullin	0.712268	0.000998104
330			EHS25_004170	Cytochrome C oxidase copper chaperone (COX17)	1.09861	0.000797063
331			EHS25_005697	Cytochrome c oxidase is the component of the respiratory chain that catalyzes the reduction of oxygen to water. Subunits 1- 3 form the functional core of the enzyme complex. CO I is the catalytic subunit of the enzyme. Electrons originating in cytochrome c are transferred via the copper A center of subunit 2 and heme A of subunit 1 to the bimetallic center formed by heme A3 and copper B	4.77353	3.36271e-05
332			EHS25_007368	Cytochrome c oxidase is the component of the respiratory chain that catalyzes the reduction of oxygen to water. Subunits 1- 3 form the functional core of the enzyme complex. CO I is the catalytic subunit of the enzyme. Electrons originating in cytochrome c are transferred via the copper A center of subunit 2 and heme A of subunit 1 to the bimetallic center formed by heme A3 and copper B	3.13289	9.90931e-12
333			EHS25_001154	Cytochrome c oxidase subunit IV	1.03468	6.30172e-10
334			EHS25_008103	Cytochrome c oxidase subunit VIa	0.896738	0.026408
335			EHS25_008321	DASH complex subunit Dad4	0.866733	0.00540514
336			EHS25_003147	DNA binding	0.613326	0.0441194
337			EHS25_001449	DNA directed RNA polymerase, 7 kDa subunit	1.31197	6.39225e-06
338			EHS25_000499	DNA polymerase alpha/epsilon subunit B	0.654006	0.0443587
339			EHS25_005990	DNA-dependent RNA polymerase catalyzes the transcription of DNA into RNA using the four ribonucleoside triphosphates as substrates	1.61462	5.18113e-06
340			EHS25_007564	DNA-directed RNA polymerases I, II, and III polypeptide	0.937603	0.00174285
341			EHS25_005288	Domain of unknown function (DUF202)	0.823061	1.32295e-06
342			EHS25_002932	Domain of unknown function DUF21	0.907395	3.83772e-11
343			EHS25_009452	DUF4217	1.24264	0.000355431
344			EHS25_004298	Dynactin p62 family	1.66052	4.18432e-06
345			EHS25_000184	Dynein light chain type 1	0.975191	4.96356e-06
346			EHS25_006498	EB1-like C-terminal motif	0.775318	0.00878351
347			EHS25_003763	EF-hand domain	0.89863	3.75465e-06
348			EHS25_001421	Endoplasmic reticulum protein	0.830327	1.60285e-05
349			EHS25_004458	Endoplasmic Reticulum-Golgi Intermediate Compartment (ERGIC)	1.46923	3.84745e-15
350			EHS25_002589	ER lumen protein retaining receptor	0.647245	0.00368031
351			EHS25_007757	ER membrane protein complex	1.24304	0.0393154
352			EHS25_010007	Essential protein required for the accumulation of box C D snoRNA	1.31071	0.000396258
353			EHS25_004672	Essential subunit of the N-oligosaccharyl transferase (OST) complex which catalyzes the transfer of a high mannose oligosaccharide from a lipid-linked oligosaccharide donor to an asparagine residue within an Asn-X-Ser Thr consensus motif in nascent polypeptide chains	0.773291	0.00946455
354			EHS25_009432	Eukaryotic protein of unknown function (DUF846)	1.54664	8.34144e-09
355			EHS25_002293	Exosome component EXOSC1/CSL4	1.43129	2.54853e-12
356			EHS25_004543	Ferredoxin-fold anticodon binding domain	0.829977	6.26134e-05
357			EHS25_002826	Functions as actin-binding component of the Arp2 3 complex which is involved in regulation of actin polymerization and together with an activating nucleation-promoting factor (NPF) mediates the formation of branched actin networks	0.62681	0.000760551
358			EHS25_009044	Functions as actin-binding component of the Arp2 3 complex which is involved in regulation of actin polymerization and together with an activating nucleation-promoting factor (NPF) mediates the formation of branched actin networks. Seems to contact the mother actin filament	1.05078	3.83908e-06
359			EHS25_002384	galactosyltransferase activity	1.54713	3.45648e-10
360			EHS25_006539	Glutaredoxin	0.619249	0.0169561
361			EHS25_007676	Glycosyl hydrolase family 63 N-terminal domain	0.605108	0.0437494
362			EHS25_001027	GNS1/SUR4 family	0.855257	4.25293e-07
363			EHS25_003724	grpe protein	0.599555	0.0307781
364			EHS25_004154	Gtr1/RagA G protein conserved region	1.14725	0.000224501
365			EHS25_004992	Gtr1/RagA G protein conserved region	0.780111	0.00666752
366			EHS25_002989	Has a dual role in the assembly of mitochondrial ATPase	1.8003	2.80675e-18
367			EHS25_005596	helix loop helix domain	1.65998	1.99292e-09
368			EHS25_002518	Histone-like transcription factor (CBF/NF-Y) and archaeal histone	0.696265	0.028798
369			EHS25_002998	Histone-like transcription factor (CBF/NF-Y) and archaeal histone	1.69947	4.65194e-10
370			EHS25_009738	Histone-like transcription factor (CBF/NF-Y) and archaeal histone	0.838684	0.00807894
371			EHS25_004454	HORMA domain	0.619511	0.0218889
372			EHS25_002076	ICE2	0.885384	9.49331e-05
373			EHS25_001992	Inner membrane protein import complex subunit Tim54	1.07391	3.93265e-14
374			EHS25_010176	Intracellular phospholipase B that catalyzes the double deacylation of phosphatidylcholine (PC) to glycerophosphocholine (GroPCho). Plays an important role in membrane lipid homeostasis	0.911358	6.10665e-07
375			EHS25_003568	K homology RNA-binding domain	0.720345	0.0413067
376			EHS25_003891	KR domain	0.889502	0.000272801
377			EHS25_003490	LNS2	1.1597	3.26406e-07
378			EHS25_006694	Mannosyltransferase (PIG-M)	0.66023	0.0179904
379			EHS25_001058	Mannosyltransferase involved in glycosylphosphatidylinositol-anchor biosynthesis	1.24309	1.11443e-08
380			EHS25_005159	May be involved in specific transport of UDP-Gal from the cytosol to the Golgi lumen. Involved in the maintenance of optimal conditions for the folding of secretory pathway proteins in the endoplasmic reticulum (By similarity)	0.751336	0.00363345
381			EHS25_000159	Membrane bound O-acyl transferase family	1.06659	0.000632841
382			EHS25_003470	metallochaperone-like domain	1.05225	7.00881e-06
383			EHS25_006164	Methionine-tRNA ligase	0.757751	2.637e-05
384			EHS25_004637	Minor histocompatibility antigen h13	2.16536	4.80832e-14
385			EHS25_003336	Mitochondrial import inner membrane translocase subunit tim14	1.33551	6.90364e-06
386			EHS25_006609	mitochondrial import receptor subunit tom40	0.585874	0.00764394
387			EHS25_009199	Mitochondrial ribosomal protein L31	1.59899	6.93123e-06
388			EHS25_009714	Mitosis protein DIM1	1.95231	3.23593e-10
389			EHS25_007779	NDK	0.81141	0.0196595
390			EHS25_009284	Nonessential protein required for the fusion of transport vesicles derived from the endocytic pathway with the Golgi complex	1.65276	7.51174e-18
391			EHS25_009028	Nuclear mRNA splicing	0.704834	0.00108657
392			EHS25_008637	Nucleoporin complex subunit 54	0.928411	0.00298647
393			EHS25_002413	Nucleoporin protein Ndc1-Nup	0.771859	8.67238e-06
394			EHS25_002821	Nucleosome assembly protein I	0.64787	0.000104974
395			EHS25_005998	Nucleotide hydrolase	2.30714	0.0037868
396			EHS25_003016	Paf1	0.656395	0.000249894
397			EHS25_000411	PAP2 superfamily	0.928105	0.000115596
398			EHS25_000425	Peptidase C13 family	0.619385	0.00733541
399			EHS25_003734	Peptidase S24-like	1.60926	5.86742e-14
400			EHS25_005006	Pet100	2.32135	1.257e-12
401			EHS25_000085	Phosphatidylinositol-glycan biosynthesis class S protein	1.01889	1.08829e-08
402			EHS25_002369	PIGA (GPI anchor biosynthesis)	0.790903	0.000367229
403			EHS25_007817	Plays a complex role in regulating the basal catalytic activity of the alpha subunit	0.841799	0.0022673
404			EHS25_005967	Plays an important role in the de novo pathway and in the salvage pathway of purine nucleotide biosynthesis. Catalyzes the first	0.892166	0.00398178
405			EHS25_008162	Poly(ADP-ribose) polymerase and DNA-Ligase Zn-finger region	0.848603	4.94373e-05
406			EHS25_006153	prohibitin homologues	1.10061	0.000901658
407			EHS25_006165	prohibitin homologues	1.00271	7.23214e-07
408			EHS25_007502	Promotes mitochondrial protein synthesis. May act as a fidelity factor of the translation reaction, by catalyzing a one- codon backward translocation of tRNAs on improperly translocated ribosomes. Binds to mitochondrial ribosomes in a GTP-dependent manner	0.883407	0.00954446
409			EHS25_006514	Proteasome subunit	0.612342	0.00606204
410			EHS25_001203	Protein of unknown function (DUF1674)	0.882731	0.000879703
411			EHS25_000424	Protein of unknown function (DUF2781)	0.821492	0.00126752
412			EHS25_004488	Protein transport protein bet1	1.49176	1.04335e-08
413			EHS25_002517	PRP38 family	0.884659	0.000240364
414			EHS25_006796	Putative RNA methylase family UPF0020	0.905395	0.0031054
415			EHS25_006617	Removes the N-terminal methionine from nascent proteins. The N-terminal methionine is often cleaved when the second residue in the primary sequence is small and uncharged (Met-Ala-, Cys, Gly, Pro, Ser, Thr, or Val)	0.725634	0.00011242
416			EHS25_003054	Replication factor C C-terminal domain	1.16484	3.71787e-06
417			EHS25_004605	Replication factor C C-terminal domain	0.624249	0.000666765
418			EHS25_002857	Required for endonucleolytic cleavage during polyadenylation-dependent pre-mRNA 3'-end formation	0.877931	0.0057288
419			EHS25_006448	Required for proper 27S pre-rRNA processing and 60S ribosome subunit assembly	0.776498	0.0130836
420			EHS25_009126	Required for ribosome biogenesis. Part of a complex which catalyzes pseudouridylation of rRNA. This involves the isomerization of uridine such that the ribose is subsequently attached to C5, instead of the normal N1	1.19404	9.64013e-07
421			EHS25_009021	Required for the assembly and or stability of the 40S ribosomal subunit. Required for the processing of the 20S rRNA- precursor to mature 18S rRNA in a late step of the maturation of 40S ribosomal subunits	1.91395	8.93718e-08
422			EHS25_007789	Reverse transcriptase (RNA-dependent DNA polymerase)	1.09194	4.45624e-07
423			EHS25_006591	Ribosomal L37ae protein family	2.33959	3.1865e-11
424			EHS25_003335	ribosomal protein	0.839002	0.0140978
425			EHS25_003833	Ribosomal protein L7Ae/L30e/S12e/Gadd45 family	0.77603	0.0169796
426			EHS25_008560	Ribosomal protein S4/S9 N-terminal domain	1.48344	7.73515e-07
427			EHS25_009427	Ribosomal protein S8e	1.64759	4.56582e-09
428			EHS25_009092	Ribosomal proteins 50S-L15, 50S-L18e, 60S-L27A	1.14266	8.71898e-08
429			EHS25_007447	Ribosome-associated complex head domain	0.665422	0.0153764
430			EHS25_003033	RNA 3'-terminal phosphate cyclase (RTC), insert domain	1.09213	0.00374901
431			EHS25_006276	RNA polymerase III RPC4	0.841367	2.39839e-05
432			EHS25_008690	RNA polymerase III subunit Rpc25	0.759427	0.00118494
433			EHS25_009474	RNA polymerase Rpb3/Rpb11 dimerisation domain	0.786631	0.00362811
434			EHS25_000515	RNA polymerase Rpc34 subunit	0.904184	7.0102e-06
435			EHS25_004480	RNA recognition motif	0.859977	0.00712924
436			EHS25_005360	rRNA processing-related protein	0.78522	0.0189108
437			EHS25_000473	S-adenosyl-L-methionine-dependent methyltransferase that specifically methylates the N(1) position of an adenine present in helix 65 in 25S rRNA	0.703693	0.0349315
438			EHS25_009918	Sec61beta family	0.940519	0.00128886
439			EHS25_005944	SecE/Sec61-gamma subunits of protein translocation complex	1.05185	1.33919e-06
440			EHS25_003460	Serine aminopeptidase, S33	1.20418	0.000105509
441			EHS25_001431	SHS2 domain found in N terminus of Rpb7p/Rpc25p/MJ0397	0.816834	6.30782e-06
442			EHS25_000258	Sirohaem biosynthesis protein C-terminal	0.737795	0.036078
443			EHS25_003358	Skp1 family, tetramerisation domain	1.51051	3.45648e-10
444			EHS25_002515	snRNP Sm proteins	2.23846	6.19531e-19
445			EHS25_006202	snRNP Sm proteins	0.950987	9.60845e-05
446			EHS25_008116	snRNP Sm proteins	0.706302	0.0305324
447			EHS25_008787	snRNP Sm proteins	0.634385	0.0387651
448			EHS25_010129	snRNP Sm proteins	0.990366	3.28162e-07
449			EHS25_005028	Sof1-like domain	0.649173	0.0227264
450			EHS25_007552	Specifically methylates the N1 position of guanosine-37 in various cytoplasmic and mitochondrial tRNAs. Methylation is not dependent on the nature of the nucleoside 5' of the target nucleoside. This is the first step in the biosynthesis of wybutosine (yW), a modified base adjacent to the anticodon of tRNAs and required for accurate decoding	0.883697	0.0198092
451			EHS25_002424	Ssu72-like protein	1.3533	6.74626e-09
452			EHS25_002508	Staphylococcal nuclease homologues	0.662333	0.000359128
453			EHS25_006092	structural constituent of ribosome	0.839264	0.000643625
454			EHS25_007834	Suppressor of forked protein (Suf)	0.798205	0.0318621
455			EHS25_001676	This enzyme is required for electron transfer from NADP to cytochrome P450 in microsomes. It can also provide electron transfer to heme oxygenase and cytochrome B5. Involved in ergosterol biosynthesis	1.16723	4.89856e-06
456			EHS25_005598	This enzyme is required for electron transfer from NADP to cytochrome P450 in microsomes. It can also provide electron transfer to heme oxygenase and cytochrome B5. Involved in ergosterol biosynthesis	1.17647	5.26176e-06
457			EHS25_002585	This magnesium-dependent enzyme catalyzes the hydrolysis of ATP coupled with the transport of calcium	0.639815	0.0142317
458			EHS25_010191	Tim10/DDP family zinc finger	0.743541	0.00830247
459			EHS25_009264	Tim17/Tim22/Tim23/Pmp24 family	0.831902	0.000174661
460			EHS25_006070	to TIGR gene model, INSD accession	0.686278	0.0209633
461			EHS25_000139	Transcription factor	1.13197	0.00268426
462			EHS25_010058	Transcription factor IIA, alpha/beta subunit	0.723385	1.63759e-05
463			EHS25_008070	transcription initiation factor	0.715718	0.00802477
464			EHS25_008180	transcription initiation factor IIF subunit alpha	1.64584	7.75881e-10
465			EHS25_009785	transferase activity, transferring glycosyl groups	2.14286	5.62841e-06
466			EHS25_008222	Translationally controlled tumour protein	0.603337	0.0137862
467			EHS25_002385	Tubulin binding cofactor A	1.70354	3.1383e-08
468			EHS25_004294	Type I phosphodiesterase / nucleotide pyrophosphatase	0.740986	0.00189546
469			EHS25_005946	U1 snRNP 70K protein (Short form)	0.881792	0.000861022
470			EHS25_003788	UAA transporter family	1.12019	0.00226949
471			EHS25_001003	Ubiquitin homologues	0.817877	8.63969e-05
472			EHS25_009507	UDP-glucose:Glycoprotein Glucosyltransferase	0.966394	4.29138e-08
473			EHS25_007752	UDP-N-acetylglucosamine transporter	1.47851	1.98072e-06
474			EHS25_008134	Utp13 specific WD40 associated domain	0.99856	0.00189358
475			EHS25_003080	Utp25, U3 small nucleolar RNA-associated SSU processome protein 25	0.869638	0.00216864
476			EHS25_000025	Vacuolar effluxer which mediate the efflux of amino acids resulting from autophagic degradation. The release of autophagic amino acids allows the maintenance of protein synthesis and viability during nitrogen starvation	1.4043	0.00154381
477			EHS25_009741	Vacuolar protein sorting 55	1.10508	1.90058e-05
478			EHS25_001265	Voltage gated chloride channel	0.712356	0.00383211
479			EHS25_005010	WD domain, G-beta repeat	1.05522	9.10098e-05
480			EHS25_005026	XPC-binding domain	0.837537	0.000454464
481			EHS25_001311	Yeast mitochondrial distribution and morphology (MDM) proteins	1.00569	5.05923e-07
482			EHS25_009700	Zinc finger C-x8-C-x5-C-x3-H type (and similar)	0.792606	0.00181473
483			EHS25_004661	Zinc-finger double-stranded RNA-binding	0.752752	0.0418383
484		GO:0006364	EHS25_001475	3' exoribonuclease family, domain 1	0.899842	0.0422388
485		rRNA processing	EHS25_008302	arm repeat-containing protein	1.09173	1.11367e-07
486			EHS25_010075	Belongs to the protein kinase superfamily. RIO-type Ser Thr kinase family	0.796536	0.000503447
487			EHS25_002897	Belongs to the universal ribosomal protein uL1 family	1.31202	3.12404e-07
488			EHS25_000150	Brix	0.992954	1.2571e-10
489			EHS25_004262	BUD22	0.845028	0.00728807
490			EHS25_010214	Bystin	0.637433	0.0460759
491			EHS25_004321	Catalyzes the prenylation of para-hydroxybenzoate (PHB) with an all-trans polyprenyl group. Mediates the second step in the final reaction sequence of coenzyme Q (CoQ) biosynthesis, which is the condensation of the polyisoprenoid side chain with PHB, generating the first membrane-bound Q intermediate	0.896883	0.000381663
492			EHS25_009955	Component of the NOP7 complex, which is required for maturation of the 25S and 5.8S ribosomal RNAs and formation of the 60S ribosome	0.745395	0.0212522
493			EHS25_006763	Component of the ribosome assembly machinery. Nuclear paralog of the ribosomal protein P0, it binds pre-60S subunits at an early stage of assembly in the nucleolus, and is replaced by P0 in cytoplasmic pre-60S subunits and mature 80S ribosomes	0.706644	0.00721153
494			EHS25_004686	Conserved hypothetical ATP binding protein	0.712291	9.17418e-05
495			EHS25_002932	Domain of unknown function DUF21	0.907395	3.83772e-11
496			EHS25_009452	DUF4217	1.24264	0.000355431
497			EHS25_000184	Dynein light chain type 1	0.975191	4.96356e-06
498			EHS25_010007	Essential protein required for the accumulation of box C D snoRNA	1.31071	0.000396258
499			EHS25_007473	LSM domain	0.657263	0.00391661
500			EHS25_006694	Mannosyltransferase (PIG-M)	0.66023	0.0179904
501			EHS25_003364	Methyltransferase involved in Williams-Beuren syndrome	0.83129	0.00256275
502			EHS25_002039	monoubiquitination-related protein	1.75741	2.18504e-09
503			EHS25_009126	Required for ribosome biogenesis. Part of a complex which catalyzes pseudouridylation of rRNA. This involves the isomerization of uridine such that the ribose is subsequently attached to C5, instead of the normal N1	1.19404	9.64013e-07
504			EHS25_009021	Required for the assembly and or stability of the 40S ribosomal subunit. Required for the processing of the 20S rRNA- precursor to mature 18S rRNA in a late step of the maturation of 40S ribosomal subunits	1.91395	8.93718e-08
505			EHS25_006591	Ribosomal L37ae protein family	2.33959	3.1865e-11
506			EHS25_003335	ribosomal protein	0.839002	0.0140978
507			EHS25_003833	Ribosomal protein L7Ae/L30e/S12e/Gadd45 family	0.77603	0.0169796
508			EHS25_008560	Ribosomal protein S4/S9 N-terminal domain	1.48344	7.73515e-07
509			EHS25_009427	Ribosomal protein S8e	1.64759	4.56582e-09
510			EHS25_006885	Ribosome biogenesis protein Nop16	0.957941	0.00790497
511			EHS25_007447	Ribosome-associated complex head domain	0.665422	0.0153764
512			EHS25_001178	rRNA processing	0.737763	0.0122236
513			EHS25_005360	rRNA processing-related protein	0.78522	0.0189108
514			EHS25_000473	S-adenosyl-L-methionine-dependent methyltransferase that specifically methylates the N(1) position of an adenine present in helix 65 in 25S rRNA	0.703693	0.0349315
515			EHS25_005371	Sas10/Utp3/C1D family	0.870828	0.0045237
516			EHS25_002515	snRNP Sm proteins	2.23846	6.19531e-19
517			EHS25_006202	snRNP Sm proteins	0.950987	9.60845e-05
518			EHS25_008116	snRNP Sm proteins	0.706302	0.0305324
519			EHS25_010129	snRNP Sm proteins	0.990366	3.28162e-07
520			EHS25_007834	Suppressor of forked protein (Suf)	0.798205	0.0318621
521			EHS25_004379	Trm112p-like protein	0.875028	0.0341447
522			EHS25_006473	U3 small nucleolar RNA-associated protein 6	0.905013	0.00399395
523			EHS25_008134	Utp13 specific WD40 associated domain	0.99856	0.00189358
524			EHS25_010302	Utp21 specific WD40 associated putative domain	0.684099	0.0175016
525			EHS25_003080	Utp25, U3 small nucleolar RNA-associated SSU processome protein 25	0.869638	0.00216864
526			EHS25_005010	WD domain, G-beta repeat	1.05522	9.10098e-05
527		GO:1901565	EHS25_009499	2-oxoacid dehydrogenases acyltransferase (catalytic domain)	-1.80273	4.02168e-12
528		organonitrogen compound catabolic process	EHS25_002593	AAA domain	-0.869076	0.000661487
529			EHS25_008866	AAA domain (Cdc48 subfamily)	-0.909869	1.90187e-06
530			EHS25_003355	Alanine dehydrogenase/PNT, N-terminal domain	-1.5616	0.000257914
531			EHS25_004263	Aldehyde dehydrogenase family	-2.13691	1.24567e-15
532			EHS25_002131	Amidase	-0.844649	0.0245487
533			EHS25_001695	Amidohydrolase family	-0.789121	0.00270558
534			EHS25_007814	Aminotransferase class I and II	-0.68329	0.0432612
535			EHS25_002947	Anaphase-promoting complex subunit 1	-1.1105	0.00437841
536			EHS25_009064	Anaphase-promoting complex subunit 4 WD40 domain	-0.836716	0.0270535
537			EHS25_003771	Arginase family	-0.823956	0.00229971
538			EHS25_002431	As part of the replication protein A (RPA RP-A), a single-stranded DNA-binding heterotrimeric complex, may play an essential role in DNA replication, recombination and repair. Binds and stabilizes single-stranded DNA intermediates, preventing complementary DNA reannealing and recruiting different proteins involved in DNA metabolism	-0.799144	0.0128327
539			EHS25_000027	Belongs to the class-III pyridoxal-phosphate-dependent aminotransferase family	-1.33769	0.0266142
540			EHS25_003208	Belongs to the enoyl-CoA hydratase isomerase family	-1.16896	0.0035013
541			EHS25_006837	Belongs to the glycosyl hydrolase 18 family	-2.24385	0.000772703
542			EHS25_010097	Belongs to the metallo-dependent hydrolases superfamily. Peptidase M19 family	-1.29326	0.00036669
543			EHS25_004323	Belongs to the protein kinase superfamily	-0.979327	5.21869e-05
544			EHS25_007248	Beta-eliminating lyase	-1.85643	2.98481e-08
545			EHS25_002680	cAMP phosphodiesterases class-II	-0.787042	0.0286998
546			EHS25_005979	Carboxypeptidase s	-1.28809	0.000671322
547			EHS25_008342	Catalyzes the cleavage of L-kynurenine (L-Kyn) and L-3- hydroxykynurenine (L-3OHKyn) into anthranilic acid (AA) and 3- hydroxyanthranilic acid (3-OHAA), respectively	-0.615361	1.06354e-05
548			EHS25_003099	Catalyzes the NAD( )-dependent oxidation of formate to carbon dioxide. Formate oxidation is the final step in the methanol oxidation pathway in methylotrophic microorganisms. Has a role in the detoxification of exogenous formate in non- methylotrophic organisms	-3.27853	9.19314e-11
549			EHS25_002817	Converts proline to delta-1-pyrroline-5-carboxylate	-2.25951	2.21808e-08
550			EHS25_009585	CSN8/PSMD8/EIF3K family	-0.878184	0.046854
551			EHS25_007228	Cytidine and deoxycytidylate deaminase zinc-binding region	-1.23012	0.0188374
552			EHS25_000516	Domain of unknown function	-0.871385	0.00151754
553			EHS25_004386	Endonuclease/Exonuclease/phosphatase family	-1.09593	6.67558e-13
554			EHS25_001260	Endoplasmic reticulum protein	-1.50532	3.84968e-06
555			EHS25_004717	Enolase C-terminal domain-like protein	-10.6133	9.57873e-08
556			EHS25_009211	FAD-dependent monooxygenase required for the C5-ring hydroxylation during ubiquinone biosynthesis. Catalyzes the hydroxylation of 3-polyprenyl-4-hydroxybenzoic acid to 3- polyprenyl-4,5-dihydroxybenzoic acid. The electrons required for the hydroxylation reaction may be funneled indirectly from NADPH via a ferredoxin ferredoxin reductase system to COQ6	-0.67588	0.0222944
557			EHS25_007820	F-box-like	-1.29459	0.000353791
558			EHS25_009132	Flavoprotein (FP) subunit of succinate dehydrogenase (SDH) that is involved in complex II of the mitochondrial electron transport chain and is responsible for transferring electrons from succinate to ubiquinone (coenzyme Q)	-0.774705	3.50819e-05
559			EHS25_008963	Fumarylacetoacetase N-terminal	-3.63855	0.00744324
560			EHS25_001594	Gamma-glutamyltranspeptidase	-1.42764	0.0129122
561			EHS25_009734	Gamma-glutamyltranspeptidase	-1.9302	9.23258e-06
562			EHS25_007885	Glycosyl hydrolases family 18	-1.18012	6.19711e-07
563			EHS25_001515	Heat shock protein HSP60	-0.90719	0.0340901
564			EHS25_002087	late endosome to vacuole transport-related protein	-0.690049	0.00266442
565			EHS25_003492	LNS2	-0.707865	2.66115e-05
566			EHS25_007477	Lon protease (S16) C-terminal proteolytic domain	-0.817312	0.0427768
567			EHS25_000840	Mandelate racemase / muconate lactonizing enzyme, C-terminal domain	-1.72971	1.26274e-05
568			EHS25_003418	Methylcrotonoyl-Coenzyme A carboxylase 1	-2.43356	9.18886e-07
569			EHS25_000028	Methylmalonate-semialdehyde dehydrogenase	-3.46109	0.000250912
570			EHS25_009310	Methylmalonate-semialdehyde dehydrogenase	-2.30912	5.97631e-11
571			EHS25_005416	NAD( )-dependent glutamate dehydrogenase which degrades glutamate to ammonia and alpha-ketoglutarate	-1.09131	0.000134288
572			EHS25_010095	otu-domain-containing protein	-0.901457	0.0200906
573			EHS25_006544	Peptidase dimerisation domain	-1.1487	9.58547e-05
574			EHS25_006891	Peptidase dimerisation domain	-1.05411	0.00120207
575			EHS25_009679	Peptidase dimerisation domain	-1.69442	0.00117402
576			EHS25_003009	Peptidase family M20/M25/M40	-4.51103	3.74926e-05
577			EHS25_005951	PI31 proteasome regulator	-2.19734	0.00163697
578			EHS25_000075	Proteasome subunit	-0.687201	0.000495559
579			EHS25_002357	Proteasome subunit	-0.643717	0.0151641
580			EHS25_009333	Proteasome subunit	-1.25173	0.000799087
581			EHS25_002118	Proteasome subunit A N-terminal signature Add an annotation	-0.825191	0.0104801
582			EHS25_006566	Proteasome subunit A N-terminal signature Add an annotation	-1.10259	0.000449608
583			EHS25_000166	Proteasome subunit beta type	-0.683221	0.000756435
584			EHS25_003600	Proteasome/cyclosome repeat	-0.732874	0.00043515
585			EHS25_007216	Proteasome/cyclosome repeat	-5.92922	0.000709885
586			EHS25_002997	Ring finger domain	-0.785565	0.00493641
587			EHS25_004453	Snf7	-0.767499	0.000258321
588			EHS25_004460	Spc97 / Spc98 family	-0.699746	0.0238562
589			EHS25_006252	Taurine catabolism dioxygenase TauD, TfdA family	-2.96986	2.15068e-31
590			EHS25_009243	The glycine cleavage system catalyzes the degradation of glycine	-0.821613	0.00499999
591			EHS25_007958	thiol-dependent ubiquitin-specific protease activity	-2.39566	0.00112599
592			EHS25_003585	This protein is an auxiliary protein of DNA polymerase delta and is involved in the control of eukaryotic DNA replication by increasing the polymerase's processibility during elongation of the leading strand	-0.707397	0.0324182
593			EHS25_003452	Tryptophan 2,3-dioxygenase	-2.85264	3.85068e-09
594			EHS25_000494	Ubiquitin carboxyl-terminal hydrolase	-1.02872	0.00153168
595			EHS25_006784	Ubiquitin carboxyl-terminal hydrolase	-0.669334	0.00682021
596			EHS25_007455	Ubiquitin fusion degradation protein UFD1	-0.854623	0.000158537
597			EHS25_004186	Ubiquitin homologues	-1.57317	8.39802e-10
598			EHS25_005941	Ubiquitin-activating enzyme e1 C-terminal domain	-0.647751	0.00340231
599			EHS25_004251	Urease alpha-subunit, N-terminal domain	-0.753564	0.00121526
600			EHS25_007682	WD40 repeats	-0.673005	6.582e-05
601			EHS25_000368	Zn-finger in ubiquitin-hydrolases and other protein	-0.60567	0.00143455
602		GO:0046395	EHS25_009499	2-oxoacid dehydrogenases acyltransferase (catalytic domain)	-1.80273	4.02168e-12
603		carboxylic acid catabolic process	EHS25_006864	ABC transporter transmembrane region 2	-1.02973	0.00057478
604			EHS25_002837	Acyl transferase domain	-1.58125	8.00369e-10
605			EHS25_003355	Alanine dehydrogenase/PNT, N-terminal domain	-1.5616	0.000257914
606			EHS25_004263	Aldehyde dehydrogenase family	-2.13691	1.24567e-15
607			EHS25_002131	Amidase	-0.844649	0.0245487
608			EHS25_008452	Amidase	-1.12631	0.000296218
609			EHS25_007814	Aminotransferase class I and II	-0.68329	0.0432612
610			EHS25_008256	Anhydro-N-acetylmuramic acid kinase	-5.26434	0.0473076
611			EHS25_003771	Arginase family	-0.823956	0.00229971
612			EHS25_002431	As part of the replication protein A (RPA RP-A), a single-stranded DNA-binding heterotrimeric complex, may play an essential role in DNA replication, recombination and repair. Binds and stabilizes single-stranded DNA intermediates, preventing complementary DNA reannealing and recruiting different proteins involved in DNA metabolism	-0.799144	0.0128327
613			EHS25_000027	Belongs to the class-III pyridoxal-phosphate-dependent aminotransferase family	-1.33769	0.0266142
614			EHS25_000392	Belongs to the D-isomer specific 2-hydroxyacid dehydrogenase family	-3.73001	0.0118904
615			EHS25_003195	Belongs to the enoyl-CoA hydratase isomerase family	-1.16058	0.0350395
616			EHS25_003208	Belongs to the enoyl-CoA hydratase isomerase family	-1.16896	0.0035013
617			EHS25_007248	Beta-eliminating lyase	-1.85643	2.98481e-08
618			EHS25_008342	Catalyzes the cleavage of L-kynurenine (L-Kyn) and L-3- hydroxykynurenine (L-3OHKyn) into anthranilic acid (AA) and 3- hydroxyanthranilic acid (3-OHAA), respectively	-0.615361	1.06354e-05
619			EHS25_002530	Catalyzes the NAD( )-dependent oxidation of formate to carbon dioxide. Formate oxidation is the final step in the methanol oxidation pathway in methylotrophic microorganisms. Has a role in the detoxification of exogenous formate in non- methylotrophic organisms	-4.7887	0.00233482
620			EHS25_002775	Catalyzes the NAD( )-dependent oxidation of formate to carbon dioxide. Formate oxidation is the final step in the methanol oxidation pathway in methylotrophic microorganisms. Has a role in the detoxification of exogenous formate in non- methylotrophic organisms	-3.92159	1.69964e-06
621			EHS25_003099	Catalyzes the NAD( )-dependent oxidation of formate to carbon dioxide. Formate oxidation is the final step in the methanol oxidation pathway in methylotrophic microorganisms. Has a role in the detoxification of exogenous formate in non- methylotrophic organisms	-3.27853	9.19314e-11
622			EHS25_002817	Converts proline to delta-1-pyrroline-5-carboxylate	-2.25951	2.21808e-08
623			EHS25_001583	Electron transfer flavoprotein FAD-binding domain	-1.39809	4.47012e-09
624			EHS25_004717	Enolase C-terminal domain-like protein	-10.6133	9.57873e-08
625			EHS25_008963	Fumarylacetoacetase N-terminal	-3.63855	0.00744324
626			EHS25_004047	Fumarylacetoacetate (FAA) hydrolase family	-3.49552	0.00473345
627			EHS25_009161	KR domain	-2.05679	0.000158471
628			EHS25_000840	Mandelate racemase / muconate lactonizing enzyme, C-terminal domain	-1.72971	1.26274e-05
629			EHS25_006393	MaoC like domain	-1.51026	0.00050434
630			EHS25_003418	Methylcrotonoyl-Coenzyme A carboxylase 1	-2.43356	9.18886e-07
631			EHS25_000028	Methylmalonate-semialdehyde dehydrogenase	-3.46109	0.000250912
632			EHS25_009310	Methylmalonate-semialdehyde dehydrogenase	-2.30912	5.97631e-11
633			EHS25_005416	NAD( )-dependent glutamate dehydrogenase which degrades glutamate to ammonia and alpha-ketoglutarate	-1.09131	0.000134288
634			EHS25_003009	Peptidase family M20/M25/M40	-4.51103	3.74926e-05
635			EHS25_009243	The glycine cleavage system catalyzes the degradation of glycine	-0.821613	0.00499999
636			EHS25_005252	Thiolase, N-terminal domain	-1.51213	1.32499e-06
637			EHS25_003452	Tryptophan 2,3-dioxygenase	-2.85264	3.85068e-09
638		GO:0019752	EHS25_006384	2OG-Fe(II) oxygenase superfamily	-1.39388	2.59408e-05
639		carboxylic acid metabolic process	EHS25_009499	2-oxoacid dehydrogenases acyltransferase (catalytic domain)	-1.80273	4.02168e-12
640			EHS25_004286	2-oxoglutarate dehydrogenase C-terminal	-2.62289	1.61937e-11
641			EHS25_009286	3-hydroxyacyl-CoA dehydrogenase, C-terminal domain	-1.43814	1.06601e-05
642			EHS25_005296	5-formyltetrahydrofolate cyclo-ligase family	-0.885495	0.000283684
643			EHS25_006864	ABC transporter transmembrane region 2	-1.02973	0.00057478
644			EHS25_000116	Acetyl-CoA carboxylase, central region	-0.958391	0.0328564
645			EHS25_004951	Acetyl-coenzyme A synthetase N-terminus	-1.08845	0.00277822
646			EHS25_001368	acid phosphatase	-10.2991	1.19008e-07
647			EHS25_002837	Acyl transferase domain	-1.58125	8.00369e-10
648			EHS25_002382	Alanine dehydrogenase/PNT, C-terminal domain	-0.787349	0.0103944
649			EHS25_003355	Alanine dehydrogenase/PNT, N-terminal domain	-1.5616	0.000257914
650			EHS25_004263	Aldehyde dehydrogenase family	-2.13691	1.24567e-15
651			EHS25_002131	Amidase	-0.844649	0.0245487
652			EHS25_008452	Amidase	-1.12631	0.000296218
653			EHS25_007814	Aminotransferase class I and II	-0.68329	0.0432612
654			EHS25_002613	AMP-binding enzyme	-1.33298	9.92132e-08
655			EHS25_008658	AMP-binding enzyme	-0.922236	0.0164909
656			EHS25_008256	Anhydro-N-acetylmuramic acid kinase	-5.26434	0.0473076
657			EHS25_003771	Arginase family	-0.823956	0.00229971
658			EHS25_002431	As part of the replication protein A (RPA RP-A), a single-stranded DNA-binding heterotrimeric complex, may play an essential role in DNA replication, recombination and repair. Binds and stabilizes single-stranded DNA intermediates, preventing complementary DNA reannealing and recruiting different proteins involved in DNA metabolism	-0.799144	0.0128327
659			EHS25_000007	Asparagine synthase	-1.30043	0.00181773
660			EHS25_008599	ATP citrate lyase citrate-binding	-1.19651	0.00053868
661			EHS25_000342	belongs to the acetylglutamate kinase family	-0.993007	0.0118202
662			EHS25_002479	Belongs to the aconitase IPM isomerase family	-1.93799	1.65621e-10
663			EHS25_009006	Belongs to the aldehyde dehydrogenase family	-1.30414	0.0175212
664			EHS25_000027	Belongs to the class-III pyridoxal-phosphate-dependent aminotransferase family	-1.33769	0.0266142
665			EHS25_000392	Belongs to the D-isomer specific 2-hydroxyacid dehydrogenase family	-3.73001	0.0118904
666			EHS25_003195	Belongs to the enoyl-CoA hydratase isomerase family	-1.16058	0.0350395
667			EHS25_003208	Belongs to the enoyl-CoA hydratase isomerase family	-1.16896	0.0035013
668			EHS25_004487	Belongs to the Glu Leu Phe Val dehydrogenases family	-1.06751	1.44169e-07
669			EHS25_002130	Belongs to the isocitrate lyase PEP mutase superfamily. Isocitrate lyase family	-4.93522	0.00150166
670			EHS25_002824	Belongs to the isocitrate lyase PEP mutase superfamily. Isocitrate lyase family	-4.89785	6.17609e-07
671			EHS25_010097	Belongs to the metallo-dependent hydrolases superfamily. Peptidase M19 family	-1.29326	0.00036669
672			EHS25_005184	Belongs to the mitochondrial carrier (TC 2.A.29) family	-0.606065	0.0361698
673			EHS25_007248	Beta-eliminating lyase	-1.85643	2.98481e-08
674			EHS25_002838	Beta-ketoacyl synthase, C-terminal domain	-1.9212	5.34978e-05
675			EHS25_000532	Biotin and Thiamin Synthesis associated domain	-1.1812	0.00190565
676			EHS25_000243	Catalyzes a 2-step reaction, involving the ATP-dependent carboxylation of the covalently attached biotin in the first step and the transfer of the carboxyl group to pyruvate in the second	-1.49019	0.000500488
677			EHS25_002731	Catalyzes conversion of folates to polyglutamate derivatives allowing concentration of folate compounds in the cell and the intracellular retention of these cofactors, which are important substrates for most of the folate-dependent enzymes that are involved in one-carbon transfer reactions involved in purine, pyrimidine and amino acid synthesis	-0.765064	0.00226313
678			EHS25_001004	Catalyzes the ATP-dependent amination of UTP to CTP with either L-glutamine or ammonia as the source of nitrogen	-0.779617	0.000585677
679			EHS25_008342	Catalyzes the cleavage of L-kynurenine (L-Kyn) and L-3- hydroxykynurenine (L-3OHKyn) into anthranilic acid (AA) and 3- hydroxyanthranilic acid (3-OHAA), respectively	-0.615361	1.06354e-05
680			EHS25_006540	Catalyzes the conversion of methylglyoxal (MG) to D- lactate in a single glutathione (GSH)-independent step. May play a role in detoxifying endogenously produced glyoxals. Involved in protection against reactive oxygen species (ROS)	-1.52135	1.16685e-05
681			EHS25_004400	Catalyzes the dehydration of methylthioribulose-1- phosphate (MTRu-1-P) into 2,3-diketo-5-methylthiopentyl-1- phosphate (DK-MTP-1-P)	-0.611166	0.0471704
682			EHS25_002530	Catalyzes the NAD( )-dependent oxidation of formate to carbon dioxide. Formate oxidation is the final step in the methanol oxidation pathway in methylotrophic microorganisms. Has a role in the detoxification of exogenous formate in non- methylotrophic organisms	-4.7887	0.00233482
683			EHS25_002775	Catalyzes the NAD( )-dependent oxidation of formate to carbon dioxide. Formate oxidation is the final step in the methanol oxidation pathway in methylotrophic microorganisms. Has a role in the detoxification of exogenous formate in non- methylotrophic organisms	-3.92159	1.69964e-06
684			EHS25_003099	Catalyzes the NAD( )-dependent oxidation of formate to carbon dioxide. Formate oxidation is the final step in the methanol oxidation pathway in methylotrophic microorganisms. Has a role in the detoxification of exogenous formate in non- methylotrophic organisms	-3.27853	9.19314e-11
685			EHS25_007555	Catalyzes the phosphorylation of pyruvate to phosphoenolpyruvate	-1.42106	0.0122865
686			EHS25_006821	Ceramide hydroxylase involved in the alpha-hydroxylation of sphingolipid-associated very long chain fatty acids. Hydroxylates the very long chain fatty acid of ceramides at C2 and C3	-0.933274	0.0179492
687			EHS25_009401	chloride channel activity	-5.4123	0.015148
688			EHS25_001262	Cobalamin-independent synthase, Catalytic domain	-0.769785	0.03952
689			EHS25_004655	Conserved oligomeric complex COG6	-0.648238	0.0483846
690			EHS25_002817	Converts proline to delta-1-pyrroline-5-carboxylate	-2.25951	2.21808e-08
691			EHS25_009438	CybS, succinate dehydrogenase cytochrome B small subunit	-1.7123	1.24948e-06
692			EHS25_009575	Cys/Met metabolism PLP-dependent enzyme	-2.28937	0.0191319
693			EHS25_004159	Dehydratase family	-1.22022	0.00625673
694			EHS25_005905	Dehydratase family	-22.8803	4.13613e-10
695			EHS25_001583	Electron transfer flavoprotein FAD-binding domain	-1.39809	4.47012e-09
696			EHS25_004717	Enolase C-terminal domain-like protein	-10.6133	9.57873e-08
697			EHS25_006248	FAD dependent oxidoreductase	-3.14829	1.87182e-06
698			EHS25_003950	Fatty acid desaturase	-1.06178	0.0351679
699			EHS25_007217	Fatty acid desaturase	-0.842073	0.0345573
700			EHS25_008653	Fatty acid desaturase	-2.35173	1.87892e-09
701			EHS25_009132	Flavoprotein (FP) subunit of succinate dehydrogenase (SDH) that is involved in complex II of the mitochondrial electron transport chain and is responsible for transferring electrons from succinate to ubiquinone (coenzyme Q)	-0.774705	3.50819e-05
702			EHS25_003609	Folic acid and derivative biosynthesis-related protein	-1.81429	8.66379e-14
703			EHS25_005127	Fructose-bisphosphate aldolase class-II	-0.763214	0.0164968
704			EHS25_008963	Fumarylacetoacetase N-terminal	-3.63855	0.00744324
705			EHS25_004047	Fumarylacetoacetate (FAA) hydrolase family	-3.49552	0.00473345
706			EHS25_001312	GHMP kinases N terminal domain	-1.26137	8.69925e-05
707			EHS25_005190	Glutamine synthetase, beta-Grasp domain	-2.20212	9.36059e-09
708			EHS25_000817	Glyceraldehyde 3-phosphate dehydrogenase, NAD binding domain	-2.86133	0.000454464
709			EHS25_004713	Glycoside hydrolase family 3 protein	-8.70951	0.022461
710			EHS25_003416	Glycosyl transferase family, a/b domain	-1.22653	9.83862e-05
711			EHS25_006020	GMP synthase C terminal domain	-1.08929	3.96269e-06
712			EHS25_008781	GXGXG motif	-1.2195	0.00108764
713			EHS25_001387	Hydroxymethylglutaryl-coenzyme A reductase	-1.12628	0.00440527
714			EHS25_007586	Iron-sulfur protein (IP) subunit of succinate dehydrogenase (SDH) that is involved in complex II of the mitochondrial electron transport chain and is responsible for transferring electrons from succinate to ubiquinone (coenzyme Q)	-1.17817	3.18224e-06
715			EHS25_003887	Iron-sulphur cluster biosynthesis	-2.42086	6.05654e-07
716			EHS25_006772	Isocitrate lyase	-1.51912	0.00779355
717			EHS25_000170	Isocitrate lyase family	-1.2792	0.00186628
718			EHS25_005194	Isocitrate/isopropylmalate dehydrogenase	-0.850972	0.00853498
719			EHS25_008768	Isocitrate/isopropylmalate dehydrogenase	-0.597814	0.00269365
720			EHS25_009161	KR domain	-2.05679	0.000158471
721			EHS25_009267	Malic enzyme, NAD binding domain	-0.745962	0.000466962
722			EHS25_010047	Malic enzyme, NAD binding domain	-1.17575	0.0118652
723			EHS25_000840	Mandelate racemase / muconate lactonizing enzyme, C-terminal domain	-1.72971	1.26274e-05
724			EHS25_006393	MaoC like domain	-1.51026	0.00050434
725			EHS25_006841	Metalloenzyme superfamily	-1.41301	5.97094e-05
726			EHS25_003418	Methylcrotonoyl-Coenzyme A carboxylase 1	-2.43356	9.18886e-07
727			EHS25_000028	Methylmalonate-semialdehyde dehydrogenase	-3.46109	0.000250912
728			EHS25_009310	Methylmalonate-semialdehyde dehydrogenase	-2.30912	5.97631e-11
729			EHS25_005416	NAD( )-dependent glutamate dehydrogenase which degrades glutamate to ammonia and alpha-ketoglutarate	-1.09131	0.000134288
730			EHS25_008021	NAT, N-acetyltransferase, of N-acetylglutamate synthase	-0.721013	0.026795
731			EHS25_009648	Nitrite and sulphite reductase 4Fe-4S domain	-1.19656	5.43471e-05
732			EHS25_001539	Pantoate-beta-alanine ligase	-0.872081	0.00716655
733			EHS25_003009	Peptidase family M20/M25/M40	-4.51103	3.74926e-05
734			EHS25_006229	Phosphoglycerate kinase	-0.663741	0.0204933
735			EHS25_005840	Phosphoribulokinase / Uridine kinase family	-7.87436	0.0119353
736			EHS25_000075	Proteasome subunit	-0.687201	0.000495559
737			EHS25_000975	Protein of unknown function (DUF1445)	-5.61636	0.00417532
738			EHS25_005055	Pyridoxal-phosphate dependent enzyme	-1.39661	0.000313444
739			EHS25_005874	Pyridoxal-phosphate dependent enzyme	-2.57122	0.0265597
740			EHS25_001489	Ribose 5-phosphate isomerase A (phosphoriboisomerase A)	-0.667144	0.0360359
741			EHS25_003162	Succinate dehydrogenase/Fumarate reductase transmembrane subunit	-2.04808	1.22049e-09
742			EHS25_006046	Succinyl-CoA synthetase functions in the citric acid cycle (TCA), coupling the hydrolysis of succinyl-CoA to the synthesis of ATP and thus represents the only step of substrate- level phosphorylation in the TCA. The beta subunit provides nucleotide specificity of the enzyme and binds the substrate succinate, while the binding sites for coenzyme A and phosphate are found in the alpha subunit	-1.607	2.85118e-07
743			EHS25_009243	The glycine cleavage system catalyzes the degradation of glycine	-0.821613	0.00499999
744			EHS25_005252	Thiolase, N-terminal domain	-1.51213	1.32499e-06
745			EHS25_010205	thiosulfate sulfurtransferase	-1.14875	0.00254178
746			EHS25_007487	Transketolase, pyrimidine binding domain	-1.08568	0.00039713
747			EHS25_004345	Transketolase, thiamine diphosphate binding domain	-1.99376	0.0234945
748			EHS25_002737	Trifunctional enzyme bearing the Gln amidotransferase (GATase) domain of anthranilate synthase, indole-glycerolphosphate synthase, and phosphoribosylanthranilate isomerase activities	-0.857313	0.00843311
749			EHS25_005936	tRNA synthetases class I (W and Y)	-1.45219	0.0105985
750			EHS25_008531	tRNA synthetases class I (W and Y)	-0.624388	0.00113077
751			EHS25_003452	Tryptophan 2,3-dioxygenase	-2.85264	3.85068e-09
752			EHS25_001032	Vacuolar effluxer which mediate the efflux of amino acids resulting from autophagic degradation. The release of autophagic amino acids allows the maintenance of protein synthesis and viability during nitrogen starvation	-1.59214	0.00701254
753	Glu_70_120	GO:1901564	EHS25_006384	2OG-Fe(II) oxygenase superfamily	1.51922	1.12533e-05
754		organonitrogen compound metabolic process	EHS25_009499	2-oxoacid dehydrogenases acyltransferase (catalytic domain)	1.69668	3.70551e-10
755			EHS25_001454	5'-AMP-activated protein kinase beta subunit, interation domain	1.66316	0.000416607
756			EHS25_005296	5-formyltetrahydrofolate cyclo-ligase family	1.53433	2.77647e-10
757			EHS25_008731	60S ribosomal protein L4 C-terminal domain	2.20566	5.31954e-06
758			EHS25_008639	AAA domain (Cdc48 subfamily)	0.686311	0.000363244
759			EHS25_008866	AAA domain (Cdc48 subfamily)	0.644414	0.00186778
760			EHS25_010103	Acetokinase family	1.53576	0.000157219
761			EHS25_010108	ACT domain	1.25705	4.75172e-05
762			EHS25_005226	Actin	0.967412	4.66068e-10
763			EHS25_006497	Actin	0.925764	0.00267263
764			EHS25_005392	Adenylate kinase, active site lid	1.0702	0.000230421
765			EHS25_002382	Alanine dehydrogenase/PNT, C-terminal domain	1.0174	0.00114272
766			EHS25_007681	alpha/beta hydrolase fold	0.751869	0.0397782
767			EHS25_002131	Amidase	0.959437	0.0135364
768			EHS25_001695	Amidohydrolase family	0.735857	0.00842136
769			EHS25_004711	amine oxidase	3.1577	0.0407213
770			EHS25_001581	and, together with other initiation factors, stimulates binding of mRNA and methionyl-tRNAi to the 40S ribosome	2.76618	1.62966e-17
771			EHS25_004070	ankyrin repeats	1.41076	0.00149429
772			EHS25_004584	Appr-1'-p processing enzyme	0.703666	0.00704506
773			EHS25_003771	Arginase family	1.11806	4.934e-05
774			EHS25_008022	Argininosuccinate lyase C-terminal	0.74991	0.0125831
775			EHS25_003182	assists the folding of proteins upon ATP hydrolysis	0.794101	0.00617577
776			EHS25_003778	assists the folding of proteins upon ATP hydrolysis	1.36069	4.54795e-14
777			EHS25_009282	assists the folding of proteins upon ATP hydrolysis	0.652709	0.00728184
778			EHS25_008262	Associates with the EF-Tu.GDP complex and induces the exchange of GDP to GTP. It remains bound to the aminoacyl-tRNA.EF- Tu.GTP complex up to the GTP hydrolysis stage on the ribosome	1.42493	0.000267894
779			EHS25_001649	ATP phosphoribosyltransferase	0.636156	0.0266446
780			EHS25_006279	ATP synthase	1.43513	0.00122379
781			EHS25_001682	ATP synthase complex subunit h	3.21046	4.42945e-08
782			EHS25_000717	ATP synthase, Delta/Epsilon chain, beta-sandwich domain	2.02129	0.000311019
783			EHS25_001982	Belongs to the 1-acyl-sn-glycerol-3-phosphate acyltransferase family	0.636658	0.0106498
784			EHS25_000342	belongs to the acetylglutamate kinase family	0.999499	0.0158495
785			EHS25_009006	Belongs to the aldehyde dehydrogenase family	1.40476	0.0140161
786			EHS25_010121	Belongs to the bacterial ribosomal protein bL17 family	1.26999	3.94045e-05
787			EHS25_004404	Belongs to the class VI-like SAM-binding methyltransferase superfamily. Isoprenylcysteine carboxyl methyltransferase family	1.13777	0.0450256
788			EHS25_000027	Belongs to the class-III pyridoxal-phosphate-dependent aminotransferase family	1.64254	0.00785162
789			EHS25_004064	Belongs to the eukaryotic ribosomal protein eL15 family	1.07024	0.00375446
790			EHS25_009663	Belongs to the eukaryotic ribosomal protein eL19 family	1.24318	9.36051e-05
791			EHS25_006532	Belongs to the eukaryotic ribosomal protein eS1 family	0.674569	0.0255349
792			EHS25_002012	Belongs to the eukaryotic ribosomal protein eS12 family	1.03727	0.0272243
793			EHS25_008485	Belongs to the eukaryotic ribosomal protein eS26 family	1.55177	0.00164463
794			EHS25_003437	Belongs to the eukaryotic ribosomal protein eS4 family	1.51075	0.0312307
795			EHS25_002507	Belongs to the eukaryotic ribosomal protein eS6 family	0.733833	0.0062234
796			EHS25_009735	Belongs to the eukaryotic ribosomal protein eS8 family	0.814496	0.0305594
797			EHS25_006526	Belongs to the GDA1 CD39 NTPase family	0.796202	0.0369312
798			EHS25_003658	Belongs to the GHMP kinase family. Mevalonate kinase subfamily	2.72999	5.05136e-06
799			EHS25_004487	Belongs to the Glu Leu Phe Val dehydrogenases family	0.791459	0.000308909
800			EHS25_006628	Belongs to the GPI family	1.11988	0.0195152
801			EHS25_005162	Belongs to the group II decarboxylase family	0.821247	0.00130707
802			EHS25_010119	Belongs to the heat shock protein 70 family	0.712327	0.00266615
803			EHS25_005387	Belongs to the iron ascorbate-dependent oxidoreductase family	2.29822	0.0012147
804			EHS25_007650	Belongs to the lyase 1 family. Adenylosuccinate lyase subfamily	0.891652	0.000336427
805			EHS25_010097	Belongs to the metallo-dependent hydrolases superfamily. Peptidase M19 family	1.34456	0.000399879
806			EHS25_000148	Belongs to the peptidase A1 family	0.985982	0.0325034
807			EHS25_008025	Belongs to the peptidase A1 family	1.18199	0.02903
808			EHS25_002730	Belongs to the peptidase M28 family	1.41713	2.94618e-05
809			EHS25_003644	Belongs to the peptidase S33 family	0.71572	0.0373442
810			EHS25_006109	Belongs to the ubiquitin-conjugating enzyme family	0.661329	0.0197948
811			EHS25_009398	Belongs to the universal ribosomal protein uL13 family	0.681663	0.00894715
812			EHS25_001120	Belongs to the universal ribosomal protein uL14 family	1.01433	0.00685966
813			EHS25_005250	Belongs to the universal ribosomal protein uL16 family	0.964449	0.0237302
814			EHS25_006955	Belongs to the universal ribosomal protein uL22 family	0.826381	0.00347784
815			EHS25_001272	Belongs to the universal ribosomal protein uL3 family	0.834738	0.00259514
816			EHS25_000320	Belongs to the universal ribosomal protein uS11 family	0.93298	0.0187158
817			EHS25_002506	Belongs to the universal ribosomal protein uS15 family	1.11329	0.000867428
818			EHS25_006211	Belongs to the universal ribosomal protein uS3 family	1.01785	0.00483484
819			EHS25_007791	Belongs to the universal ribosomal protein uS4 family	2.10898	4.73445e-05
820			EHS25_005953	Belongs to the universal ribosomal protein uS9 family	5.50695	0.000265599
821			EHS25_008573	Beta-flanking protein	1.46827	0.000517076
822			EHS25_000532	Biotin and Thiamin Synthesis associated domain	1.19743	0.00268163
823			EHS25_003747	Biotin/lipoate A/B protein ligase family	1.38634	0.0096963
824			EHS25_004965	Calcipressin	0.863698	0.00284572
825			EHS25_004350	cAMP-dependent protein kinase	0.773767	0.0232508
826			EHS25_005818	Caspase domain	0.63522	0.00414239
827			EHS25_005248	catalytic domain of ctd-like phosphatases	1.35205	5.85666e-05
828			EHS25_006321	Catalyzes the conversion of D-ribulose 5-phosphate to formate and 3,4-dihydroxy-2-butanone 4-phosphate	0.716773	0.0407213
829			EHS25_007916	Catalyzes the conversion of GlcNAc-6-P into GlcNAc-1-P during the synthesis of uridine diphosphate UDP-GlcNAc, which is a biosynthetic precursor of chitin and also supplies the amino sugars for N-linked oligosaccharides of glycoproteins	1.08893	4.27511e-07
830			EHS25_006540	Catalyzes the conversion of methylglyoxal (MG) to D- lactate in a single glutathione (GSH)-independent step. May play a role in detoxifying endogenously produced glyoxals. Involved in protection against reactive oxygen species (ROS)	2.88262	1.62966e-17
831			EHS25_004400	Catalyzes the dehydration of methylthioribulose-1- phosphate (MTRu-1-P) into 2,3-diketo-5-methylthiopentyl-1- phosphate (DK-MTP-1-P)	1.53712	1.48918e-07
832			EHS25_009217	Catalyzes the first intracellular reaction of sulfate assimilation, forming adenosine-5'-phosphosulfate (APS) from inorganic sulfate and ATP. Plays an important role in sulfate activation as a component of the biosynthesis pathway of sulfur- containing amino acids	1.99759	0.000105776
833			EHS25_000362	Catalyzes the formation of 6,7-dimethyl-8- ribityllumazine by condensation of 5-amino-6-(D- ribitylamino)uracil with 3,4-dihydroxy-2-butanone 4-phosphate. This is the penultimate step in the biosynthesis of riboflavin	0.956825	0.0145316
834			EHS25_006875	Catalyzes the interconversion between the alpha and beta anomers from at least three hexose 6-phosphate sugars (Glc6P, Gal6P, and Man6P)	1.21278	6.62445e-06
835			EHS25_003099	Catalyzes the NAD( )-dependent oxidation of formate to carbon dioxide. Formate oxidation is the final step in the methanol oxidation pathway in methylotrophic microorganisms. Has a role in the detoxification of exogenous formate in non- methylotrophic organisms	1.33418	0.0204458
836			EHS25_006872	Catalyzes the oxidative decarboxylation of 6- phosphogluconate to ribulose 5-phosphate and CO(2), with concomitant reduction of NADP to NADPH	1.21865	0.000568399
837			EHS25_003031	Catalyzes the rate-limiting step of the oxidative pentose-phosphate pathway, which represents a route for the dissimilation of carbohydrates besides glycolysis	0.658103	0.0460476
838			EHS25_001157	Catalyzes the reversible transfer of the terminal phosphate group between ATP and AMP. Plays an important role in cellular energy homeostasis and in adenine nucleotide metabolism. Adenylate kinase activity is critical for regulation of the phosphate utilization and the AMP de novo biosynthesis pathways	1.29587	0.0104971
839			EHS25_002963	Catalyzes the synthesis of activated sulfate	1.19049	0.00428001
840			EHS25_005501	Catalyzes the transfer of a two-carbon ketol group from a ketose donor to an aldose acceptor, via a covalent intermediate with the cofactor thiamine pyrophosphate	0.754718	0.0295648
841			EHS25_005393	chitin deacetylase	1.40785	0.00265753
842			EHS25_005280	Choline/Carnitine o-acyltransferase	0.783445	0.0254996
843			EHS25_003242	Clp amino terminal domain, pathogenicity island component	1.16188	0.00112255
844			EHS25_001262	Cobalamin-independent synthase, Catalytic domain	1.12952	0.00252296
845			EHS25_003546	component of the eukaryotic translation initiation factor 3 (eIF-3) complex, which is involved in protein synthesis of a specialized repertoire of mRNAs and, together with other initiation factors, stimulates binding of mRNA and methionyl-tRNAi to the 40S ribosome. The eIF-3 complex specifically targets and initiates translation of a subset of mRNAs involved in cell proliferation	0.847022	5.81333e-05
846			EHS25_003649	component of the eukaryotic translation initiation factor 3 (eIF-3) complex, which is involved in protein synthesis of a specialized repertoire of mRNAs and, together with other initiation factors, stimulates binding of mRNA and methionyl-tRNAi to the 40S ribosome. The eIF-3 complex specifically targets and initiates translation of a subset of mRNAs involved in cell proliferation	0.82925	0.0279526
847			EHS25_009009	Copper amine oxidase, N3 domain	1.03055	0.00565031
848			EHS25_006351	Coproporphyrinogen III oxidase	0.732793	0.00139805
849			EHS25_006013	Creatinase/Prolidase N-terminal domain	0.83517	0.00188533
850			EHS25_003051	C-terminal, D2-small domain, of ClpB protein	1.13215	0.00308189
851			EHS25_009438	CybS, succinate dehydrogenase cytochrome B small subunit	1.58683	2.21071e-05
852			EHS25_000231	Cyclin, N-terminal domain	0.607654	0.0447291
853			EHS25_005860	Cyclophilin type peptidyl-prolyl cis-trans isomerase/CLD	1.49307	0.00616615
854			EHS25_006552	Cys/Met metabolism PLP-dependent enzyme	1.43807	0.000336268
855			EHS25_009575	Cys/Met metabolism PLP-dependent enzyme	2.26514	0.0283789
856			EHS25_001447	Cysteine-rich motif following a subset of SET domains	0.686926	0.0303748
857			EHS25_007228	Cytidine and deoxycytidylate deaminase zinc-binding region	1.73856	0.000978065
858			EHS25_003455	Cytochrome c oxidase biogenesis-related protein	0.688872	0.0340636
859			EHS25_002568	Cytochrome c oxidase polypeptide iv, mitochondrial	3.00641	2.14999e-09
860			EHS25_008836	Cytoplasm protein	1.17627	0.00108796
861			EHS25_001180	dehydrodolichyl diphosphate synthase complex	1.17957	0.00752127
862			EHS25_003295	DHHC palmitoyltransferase	0.829134	0.00947426
863			EHS25_004066	DNA topoisomerase binding	0.841826	0.00203243
864			EHS25_002376	Domain of unknown function (DUF1981)	0.811213	8.91116e-07
865			EHS25_010299	Dual specificity phosphatase, catalytic domain	2.00395	1.46922e-05
866			EHS25_008218	dUTP diphosphatase	1.02092	0.045354
867			EHS25_008372	EF-1 guanine nucleotide exchange domain	1.00816	0.00161193
868			EHS25_004386	Endonuclease/Exonuclease/phosphatase family	0.744026	6.03713e-06
869			EHS25_006585	Endothelin-converting enzyme 1	0.842737	0.000734678
870			EHS25_006588	ERAP1-like C-terminal domain	0.689366	0.000172132
871			EHS25_007883	Erv1 / Alr family	1.40577	1.75849e-07
872			EHS25_008651	Essential subunit of the N-oligosaccharyl transferase (OST) complex which catalyzes the transfer of a high mannose oligosaccharide from a lipid-linked oligosaccharide donor to an asparagine residue within an Asn-X-Ser Thr consensus motif in nascent polypeptide chains	1.67194	8.62212e-08
873			EHS25_009743	Eukaryotic aspartyl protease	1.51764	3.23004e-08
874			EHS25_006600	FAD dependent oxidoreductase	1.78854	0.008379
875			EHS25_009211	FAD-dependent monooxygenase required for the C5-ring hydroxylation during ubiquinone biosynthesis. Catalyzes the hydroxylation of 3-polyprenyl-4-hydroxybenzoic acid to 3- polyprenyl-4,5-dihydroxybenzoic acid. The electrons required for the hydroxylation reaction may be funneled indirectly from NADPH via a ferredoxin ferredoxin reductase system to COQ6	1.54487	5.72884e-08
876			EHS25_006785	Fibrillarin	1.74576	1.74125e-07
877			EHS25_000712	Fructose-bisphosphate aldolase class-II	0.895659	0.023464
878			EHS25_004649	Functions in the early steps of protein synthesis of a small number of specific mRNAs. Acts by directing the binding of methionyl-tRNAi to 40S ribosomal subunits. In contrast to the eIF- 2 complex, it binds methionyl-tRNAi to 40 S subunits in a codon- dependent manner, whereas the eIF-2 complex binds methionyl-tRNAi to 40 S subunits in a GTP-dependent manner. May act by impiging the expression of…	0.93929	1.04381e-05
879			EHS25_002791	Fungal specific transcription factor domain	1.36375	0.0140851
880			EHS25_005264	Gamma-glutamyltranspeptidase	0.637693	0.0107319
881			EHS25_001312	GHMP kinases N terminal domain	1.00267	0.00378308
882			EHS25_009893	GHMP kinases N terminal domain	1.93326	0.000552869
883			EHS25_001651	Glucose inhibited division protein A	1.4267	0.000562487
884			EHS25_008684	Glucosidase II beta subunit-like protein	0.787497	0.0254996
885			EHS25_004328	Glycosyl hydrolase family 10	3.13407	0.00395954
886			EHS25_007676	Glycosyl hydrolase family 63 N-terminal domain	0.763231	0.0127494
887			EHS25_003416	Glycosyl transferase family, a/b domain	0.756888	0.0314507
888			EHS25_000218	Glycosyltransferase sugar-binding region containing DXD motif	1.04056	0.000653137
889			EHS25_006020	GMP synthase C terminal domain	0.636447	0.0156023
890			EHS25_008823	Golgi phosphoprotein 3 (GPP34)	0.852045	0.0096963
891			EHS25_003486	GPI biosynthesis protein family Pig-F	0.942932	0.0238571
892			EHS25_003110	GRF zinc finger	0.769283	0.013944
893			EHS25_000649	G-X-X-X-Q-X-W domain-containing protein	19.6995	5.61935e-05
894			EHS25_001515	Heat shock protein HSP60	1.24331	0.00396761
895			EHS25_003145	Heat shock protein sks2 (heat shock cognate protein hsc1)	1.26098	0.00152181
896			EHS25_002348	Histidine biosynthesis trifunctional protein	0.883245	0.0084298
897			EHS25_002046	histone serine kinase activity	0.941976	0.00985982
898			EHS25_004623	histone-lysine N-methyltransferase activity	1.74343	0.00137985
899			EHS25_002700	Homologues of snake disintegrins	0.897051	0.00605402
900			EHS25_001387	Hydroxymethylglutaryl-coenzyme A reductase	0.942162	0.0273337
901			EHS25_005995	Insulinase (Peptidase family M16)	0.77912	0.00474417
902			EHS25_005778	Involved in biosynthesis of the thiamine precursor thiazole. Catalyzes the conversion of NAD and glycine to adenosine diphosphate 5-(2-hydroxyethyl)-4-methylthiazole-2-carboxylic acid (ADT), an adenylated thiazole intermediate. The reaction includes an iron-dependent sulfide transfer from a conserved cysteine residue of the protein to a thiazole intermediate. The enzyme can only undergo a single …	1.3948	0.000480479
903			EHS25_005194	Isocitrate/isopropylmalate dehydrogenase	1.1604	0.00039983
904			EHS25_009046	JAB/MPN domain	0.594646	0.0151647
905			EHS25_000361	Ketol-acid reductoisomerase	1.34148	2.69112e-05
906			EHS25_002440	KH domain	0.755269	0.00137439
907			EHS25_001192	Kinase associated domain 1	1.12476	0.0068605
908			EHS25_000245	Links covalently the heme group to the apoprotein of cytochrome c	0.923649	0.00316255
909			EHS25_006152	Links covalently the heme group to the apoprotein of cytochrome c	1.81212	0.0148473
910			EHS25_007688	Low temperature viability protein	1.08028	5.51943e-05
911			EHS25_009578	Male sterility protein	0.794075	0.000312635
912			EHS25_000506	Malic enzyme, NAD binding domain	0.738483	0.0138218
913			EHS25_005427	Mannosyltransferase putative	0.708656	0.0367042
914			EHS25_007933	Membrane dipeptidase (Peptidase family M19)	1.23128	0.0392194
915			EHS25_006841	Metalloenzyme superfamily	1.34844	0.000293185
916			EHS25_004505	Methyltransferase	2.05575	0.00156784
917			EHS25_005943	Methyltransferase required for the conversion of 2- polyprenyl-6-methoxy-1,4-benzoquinol (DDMQH2) to 2-polyprenyl-3- methyl-6-methoxy-1,4-benzoquinol (DMQH2)	0.646531	0.0287782
918			EHS25_003816	Microsomal signal peptidase 25 kDa subunit (SPC25)	0.896129	0.0347832
919			EHS25_001609	MIR domain	0.612902	0.0423787
920			EHS25_008748	MIR domain	0.628997	0.00533125
921			EHS25_008150	Mitochondrial ATP synthase g subunit	1.27331	7.05885e-06
922			EHS25_006571	Mitochondrial membrane ATP synthase (F(1)F(0) ATP synthase or Complex V) produces ATP from ADP in the presence of a proton gradient across the membrane which is generated by electron transport complexes of the respiratory chain. F-type ATPases consist of two structural domains, F(1) - containing the extramembraneous catalytic core, and F(0) - containing the membrane proton channel, linked togethe…	2.11225	2.46665e-06
923			EHS25_009362	mRNA-binding protein involved in proper cytoplasmic distribution of mitochondria	0.888368	0.00533793
924			EHS25_009792	MYT1 kinase	1.18724	0.0421826
925			EHS25_005753	NAD dependent epimerase/dehydratase family	0.805914	0.00164463
926			EHS25_009888	NAD dependent epimerase/dehydratase family	0.654897	0.0307668
927			EHS25_008300	NAD-dependent glycerol-3-phosphate dehydrogenase N-terminus	0.638472	5.84564e-05
928			EHS25_006538	nam9 protein, mitochondrial	0.83737	0.0125882
929			EHS25_008524	NDK	2.95661	2.62361e-06
930			EHS25_007220	Nitrite and sulphite reductase 4Fe-4S domain	1.09612	0.000950364
931			EHS25_003471	Nucleotidyl transferase	0.7641	0.000922472
932			EHS25_008618	NUDIX domain	0.785617	0.0012424
933			EHS25_000800	Oligosaccharyltransferase subunit Ribophorin II	1.43073	5.05042e-05
934			EHS25_006449	O-methyltransferase that catalyzes the 2 O-methylation steps in the ubiquinone biosynthetic pathway	0.998256	0.000635003
935			EHS25_010095	otu-domain-containing protein	1.45918	0.000157606
936			EHS25_008401	OTU-like cysteine protease	0.742962	0.00459215
937			EHS25_001539	Pantoate-beta-alanine ligase	1.27434	9.51941e-05
938			EHS25_007063	participates in several chromatin remodeling complexes, including the SWR1 and the INO80 complexes	1.40525	3.08516e-05
939			EHS25_006891	Peptidase dimerisation domain	0.927176	0.00762065
940			EHS25_007315	Peptidase family M20/M25/M40	0.953493	0.00731076
941			EHS25_003264	Peptidase family M28	1.36898	0.000922472
942			EHS25_006519	Peptidase family M41	1.85133	0.0212275
943			EHS25_004523	Peptidase family M48	0.943687	0.00159245
944			EHS25_008584	Peptidase inhibitor I9	1.43678	0.000756096
945			EHS25_006229	Phosphoglycerate kinase	0.775215	0.00869269
946			EHS25_002692	Phospholipase A-2-activating protein	0.699918	0.00348624
947			EHS25_000298	Phospholipase/Carboxylesterase	0.630528	0.0100557
948			EHS25_006738	Phospholipid metabolism-related protein	0.79849	0.00838973
949			EHS25_003062	Phosphoribosyl synthetase-associated domain	1.24841	0.000172815
950			EHS25_007756	Phosphoribosylaminoimidazole carboxylase	1.13093	0.011377
951			EHS25_005951	PI31 proteasome regulator	1.52194	0.049416
952			EHS25_008323	Porphobilinogen deaminase, C-terminal domain	0.712538	0.0216249
953			EHS25_006004	PPIases accelerate the folding of proteins. It catalyzes the cis-trans isomerization of proline imidic peptide bonds in oligopeptides	1.05913	0.00424784
954			EHS25_009465	PPIases accelerate the folding of proteins. It catalyzes the cis-trans isomerization of proline imidic peptide bonds in oligopeptides	1.71073	3.25986e-06
955			EHS25_008382	PPIC-type PPIASE domain	1.00793	0.0292609
956			EHS25_000326	Produces ATP from ADP in the presence of a proton gradient across the membrane	2.90272	3.61183e-16
957			EHS25_002660	Prolyl oligopeptidase family	1.81158	3.94045e-05
958			EHS25_009987	proteasome assembly	1.50592	2.42742e-05
959			EHS25_008387	Proteasome beta subunits C terminal	1.20426	1.25881e-06
960			EHS25_006196	Proteasome regulatory subunit C-terminal	0.916384	2.43411e-11
961			EHS25_000075	Proteasome subunit	0.965376	1.68585e-06
962			EHS25_002357	Proteasome subunit	1.22697	2.51093e-06
963			EHS25_004122	proteasome subunit	0.896621	0.0161996
964			EHS25_006447	proteasome subunit	0.864613	0.00452393
965			EHS25_007978	proteasome subunit	1.09908	0.000376647
966			EHS25_009333	Proteasome subunit	2.19518	3.17447e-09
967			EHS25_002118	Proteasome subunit A N-terminal signature Add an annotation	1.48766	3.09151e-06
968			EHS25_006566	Proteasome subunit A N-terminal signature Add an annotation	1.59711	6.09413e-07
969			EHS25_000166	Proteasome subunit beta type	0.751521	0.000372318
970			EHS25_003600	Proteasome/cyclosome repeat	0.80897	0.000196458
971			EHS25_008143	Protein disulfide isomerase	1.09936	0.00973287
972			EHS25_006421	Protein of unknown function (DUF2370)	0.595146	0.000587841
973			EHS25_010025	Protein prenyltransferase alpha subunit repeat	1.03906	0.000196458
974			EHS25_006367	Pyridoxal-dependent decarboxylase, pyridoxal binding domain	1.56528	0.00995932
975			EHS25_007501	Pyridoxal-phosphate dependent enzyme	1.19957	0.0011214
976			EHS25_008669	Pyridoxamine 5'-phosphate oxidase	0.828717	0.0137788
977			EHS25_005993	pyruvate dehydrogenase protein x component, mitochondrial	1.356	0.00252623
978			EHS25_006580	racemase and epimerase activity, acting on carbohydrates and derivatives	0.590875	0.0424651
979			EHS25_004117	regulation of protein import into mitochondrial outer membrane	0.668859	0.0196605
980			EHS25_003157	Regulator of type 1 phosphatases which maintains protein phosphatase activity under strict control	1.21203	0.000517076
981			EHS25_000597	Removes 5-oxoproline from various penultimate amino acid residues except L-proline	0.805056	0.0195927
982			EHS25_003420	Required both for recombination and for the repair of DNA damage caused by X-rays	0.870002	0.00446929
983			EHS25_000953	Reverse transcriptase (RNA-dependent DNA polymerase)	1.51626	0.008914
984			EHS25_006541	Rhodanese-like protein	0.621305	0.0015126
985			EHS25_007824	Ribonuclease-III-like	1.43714	8.51847e-05
986			EHS25_001489	Ribose 5-phosphate isomerase A (phosphoriboisomerase A)	1.46188	1.86528e-06
987			EHS25_003410	Ribose/Galactose Isomerase	2.64987	0.00288096
988			EHS25_005025	Ribosomal L29 protein	0.642531	0.0322616
989			EHS25_004206	Ribosomal L38e protein family	1.33466	0.00270265
990			EHS25_004432	ribosomal L5P family C-terminus	1.6634	0.00020127
991			EHS25_009335	Ribosomal protein L13	1.10987	0.0496708
992			EHS25_008705	Ribosomal protein L14	1.12648	0.00379697
993			EHS25_006096	Ribosomal protein L34e	1.44568	0.00194091
994			EHS25_009388	Ribosomal protein S14p/S29e	2.36319	0.000663547
995			EHS25_003683	Ribosomal protein S16	0.727514	0.00833317
996			EHS25_010009	Ribosomal protein S24e	0.642573	0.0127605
997			EHS25_004148	Ribosomal protein S8	1.06068	0.013948
998			EHS25_005088	Ribulose-phosphate 3 epimerase family	1.38499	0.00184137
999			EHS25_003814	RING-like zinc finger	2.09579	8.22214e-05
1000			EHS25_003711	RNA-binding component of the eukaryotic translation initiation factor 3 (eIF-3) complex, which is involved in protein synthesis of a specialized repertoire of mRNAs and, together with other initiation factors, stimulates binding of mRNA and methionyl-tRNAi to the 40S ribosome. The eIF-3 complex specifically targets and initiates translation of a subset of mRNAs involved in cell proliferation. Thi…	1.27641	5.72907e-06
1001			EHS25_005830	Rossmann fold oxidoreductase	19.14	0.000134847
1002			EHS25_007821	S25 ribosomal protein	0.8657	0.0057741
1003			EHS25_006503	SelR domain	1.03373	1.6692e-06
1004			EHS25_003375	Semialdehyde dehydrogenase, NAD binding domain	1.26042	0.000122353
1005			EHS25_001006	Shikimate kinase	1.26346	0.00888913
1006			EHS25_005210	Sigma factor PP2C-like phosphatases	0.912672	0.0164591
1007			EHS25_005038	Sphingolipid Delta4-desaturase (DES)	1.0072	0.00154443
1008			EHS25_008081	Squalene/phytoene synthase	0.752526	0.00231956
1009			EHS25_003446	structural constituent of ribosome	0.857014	0.000320393
1010			EHS25_006046	Succinyl-CoA synthetase functions in the citric acid cycle (TCA), coupling the hydrolysis of succinyl-CoA to the synthesis of ATP and thus represents the only step of substrate- level phosphorylation in the TCA. The beta subunit provides nucleotide specificity of the enzyme and binds the substrate succinate, while the binding sites for coenzyme A and phosphate are found in the alpha subunit	1.17655	0.000498629
1011			EHS25_006271	TATA box binding protein associated factor	1.09954	0.00838766
1012			EHS25_006676	TCP-1/cpn60 chaperonin family	1.05955	0.00522279
1013			EHS25_003865	TENA/THI-4/PQQC family	0.85285	0.0450268
1014			EHS25_010206	The coatomer is a cytosolic protein complex that binds to dilysine motifs and reversibly associates with Golgi non- clathrin-coated vesicles, which further mediate biosynthetic protein transport from the ER, via the Golgi up to the trans Golgi network. Coatomer complex is required for budding from Golgi membranes, and is essential for the retrograde Golgi-to-ER transport of dilysine-tagged protei…	0.719575	3.29091e-05
1015			EHS25_002294	The pyruvate dehydrogenase complex catalyzes the overall conversion of pyruvate to acetyl-CoA and CO(2)	1.21964	0.0164928
1016			EHS25_007958	thiol-dependent ubiquitin-specific protease activity	1.61686	0.0459501
1017			EHS25_009400	Thioredoxin-like domain	1.02394	5.69911e-05
1018			EHS25_010205	thiosulfate sulfurtransferase	0.852293	0.0417161
1019			EHS25_006372	This enzyme condenses acetyl-CoA with acetoacetyl-CoA to form HMG-CoA, which is the substrate for HMG-CoA reductase	0.963879	0.0059033
1020			EHS25_007656	This protein promotes the GTP-dependent binding of aminoacyl-tRNA to the A-site of ribosomes during protein biosynthesis	1.02502	0.00480221
1021			EHS25_002286	to TIGR gene model	1.84564	9.51941e-05
1022			EHS25_001146	Transaldolase is important for the balance of metabolites in the pentose-phosphate pathway	1.23494	0.0101505
1023			EHS25_007408	Transaldolase/Fructose-6-phosphate aldolase	8.00087	0.0153999
1024			EHS25_009841	Transcription initiation factor IIF, beta subunit	0.608968	0.0236482
1025			EHS25_007487	Transketolase, pyrimidine binding domain	1.98758	5.42715e-11
1026			EHS25_009317	Trehalose-phosphatase	0.668886	0.000696043
1027			EHS25_003452	Tryptophan 2,3-dioxygenase	3.62019	1.59964e-13
1028			EHS25_000456	Ubiquinol-cytochrome C reductase hinge protein	1.96198	2.52593e-05
1029			EHS25_004186	Ubiquitin homologues	1.12376	4.85532e-05
1030			EHS25_004118	WD domain, G-beta repeat	0.806713	0.00523283
1031			EHS25_008415	Zinc-finger domain	0.941825	0.00120531
1032		GO:0044444	EHS25_006384	2OG-Fe(II) oxygenase superfamily	1.51922	1.12533e-05
1033		cytoplasmic part	EHS25_009499	2-oxoacid dehydrogenases acyltransferase (catalytic domain)	1.69668	3.70551e-10
1034			EHS25_006078	3' exoribonuclease family, domain 1	1.12416	0.000967241
1035			EHS25_008731	60S ribosomal protein L4 C-terminal domain	2.20566	5.31954e-06
1036			EHS25_008639	AAA domain (Cdc48 subfamily)	0.686311	0.000363244
1037			EHS25_010108	ACT domain	1.25705	4.75172e-05
1038			EHS25_005226	Actin	0.967412	4.66068e-10
1039			EHS25_009141	Actin	0.841768	0.000384518
1040			EHS25_005392	Adenylate kinase, active site lid	1.0702	0.000230421
1041			EHS25_003300	Amidohydrolase family	0.874881	0.0137705
1042			EHS25_001581	and, together with other initiation factors, stimulates binding of mRNA and methionyl-tRNAi to the 40S ribosome	2.76618	1.62966e-17
1043			EHS25_003771	Arginase family	1.11806	4.934e-05
1044			EHS25_008022	Argininosuccinate lyase C-terminal	0.74991	0.0125831
1045			EHS25_003182	assists the folding of proteins upon ATP hydrolysis	0.794101	0.00617577
1046			EHS25_004463	assists the folding of proteins upon ATP hydrolysis	0.900343	8.42507e-06
1047			EHS25_006183	assists the folding of proteins upon ATP hydrolysis	0.627705	0.00359603
1048			EHS25_009282	assists the folding of proteins upon ATP hydrolysis	0.652709	0.00728184
1049			EHS25_008262	Associates with the EF-Tu.GDP complex and induces the exchange of GDP to GTP. It remains bound to the aminoacyl-tRNA.EF- Tu.GTP complex up to the GTP hydrolysis stage on the ribosome	1.42493	0.000267894
1050			EHS25_001649	ATP phosphoribosyltransferase	0.636156	0.0266446
1051			EHS25_006279	ATP synthase	1.43513	0.00122379
1052			EHS25_001682	ATP synthase complex subunit h	3.21046	4.42945e-08
1053			EHS25_000717	ATP synthase, Delta/Epsilon chain, beta-sandwich domain	2.02129	0.000311019
1054			EHS25_006534	BAR	1.02833	0.00451645
1055			EHS25_001982	Belongs to the 1-acyl-sn-glycerol-3-phosphate acyltransferase family	0.636658	0.0106498
1056			EHS25_000342	belongs to the acetylglutamate kinase family	0.999499	0.0158495
1057			EHS25_009006	Belongs to the aldehyde dehydrogenase family	1.40476	0.0140161
1058			EHS25_010121	Belongs to the bacterial ribosomal protein bL17 family	1.26999	3.94045e-05
1059			EHS25_004404	Belongs to the class VI-like SAM-binding methyltransferase superfamily. Isoprenylcysteine carboxyl methyltransferase family	1.13777	0.0450256
1060			EHS25_000027	Belongs to the class-III pyridoxal-phosphate-dependent aminotransferase family	1.64254	0.00785162
1061			EHS25_008395	Belongs to the cytochrome b5 family	1.50623	0.00231535
1062			EHS25_004064	Belongs to the eukaryotic ribosomal protein eL15 family	1.07024	0.00375446
1063			EHS25_009663	Belongs to the eukaryotic ribosomal protein eL19 family	1.24318	9.36051e-05
1064			EHS25_006532	Belongs to the eukaryotic ribosomal protein eS1 family	0.674569	0.0255349
1065			EHS25_002012	Belongs to the eukaryotic ribosomal protein eS12 family	1.03727	0.0272243
1066			EHS25_008485	Belongs to the eukaryotic ribosomal protein eS26 family	1.55177	0.00164463
1067			EHS25_003437	Belongs to the eukaryotic ribosomal protein eS4 family	1.51075	0.0312307
1068			EHS25_002507	Belongs to the eukaryotic ribosomal protein eS6 family	0.733833	0.0062234
1069			EHS25_009735	Belongs to the eukaryotic ribosomal protein eS8 family	0.814496	0.0305594
1070			EHS25_002827	Belongs to the FPP GGPP synthase family	1.4978	2.13001e-05
1071			EHS25_006526	Belongs to the GDA1 CD39 NTPase family	0.796202	0.0369312
1072			EHS25_003658	Belongs to the GHMP kinase family. Mevalonate kinase subfamily	2.72999	5.05136e-06
1073			EHS25_004487	Belongs to the Glu Leu Phe Val dehydrogenases family	0.791459	0.000308909
1074			EHS25_006628	Belongs to the GPI family	1.11988	0.0195152
1075			EHS25_005162	Belongs to the group II decarboxylase family	0.821247	0.00130707
1076			EHS25_008427	Belongs to the heat shock protein 70 family	0.817645	0.000471348
1077			EHS25_010119	Belongs to the heat shock protein 70 family	0.712327	0.00266615
1078			EHS25_007650	Belongs to the lyase 1 family. Adenylosuccinate lyase subfamily	0.891652	0.000336427
1079			EHS25_003803	Belongs to the mitochondrial carrier (TC 2.A.29) family	1.60136	0.0129187
1080			EHS25_008709	Belongs to the mitochondrial carrier (TC 2.A.29) family	0.872019	0.000594584
1081			EHS25_010109	Belongs to the mitochondrial carrier (TC 2.A.29) family	0.832441	1.94769e-05
1082			EHS25_008483	Belongs to the small Tim family	1.13659	0.00109323
1083			EHS25_005246	Belongs to the sterol desaturase family	0.665568	0.0303103
1084			EHS25_004317	Belongs to the TRAFAC class dynamin-like GTPase superfamily. Dynamin Fzo YdjA family	0.64725	0.0340038
1085			EHS25_009398	Belongs to the universal ribosomal protein uL13 family	0.681663	0.00894715
1086			EHS25_001120	Belongs to the universal ribosomal protein uL14 family	1.01433	0.00685966
1087			EHS25_005250	Belongs to the universal ribosomal protein uL16 family	0.964449	0.0237302
1088			EHS25_006955	Belongs to the universal ribosomal protein uL22 family	0.826381	0.00347784
1089			EHS25_001272	Belongs to the universal ribosomal protein uL3 family	0.834738	0.00259514
1090			EHS25_000320	Belongs to the universal ribosomal protein uS11 family	0.93298	0.0187158
1091			EHS25_002506	Belongs to the universal ribosomal protein uS15 family	1.11329	0.000867428
1092			EHS25_006211	Belongs to the universal ribosomal protein uS3 family	1.01785	0.00483484
1093			EHS25_007791	Belongs to the universal ribosomal protein uS4 family	2.10898	4.73445e-05
1094			EHS25_005953	Belongs to the universal ribosomal protein uS9 family	5.50695	0.000265599
1095			EHS25_000532	Biotin and Thiamin Synthesis associated domain	1.19743	0.00268163
1096			EHS25_003747	Biotin/lipoate A/B protein ligase family	1.38634	0.0096963
1097			EHS25_006312	Calreticulin family	1.10698	4.88312e-05
1098			EHS25_005248	catalytic domain of ctd-like phosphatases	1.35205	5.85666e-05
1099			EHS25_000041	Catalytic subunit of the peripheral V1 complex of vacuolar ATPase (V-ATPase). V-ATPase is responsible for acidifying a variety of intracellular compartments in eukaryotic cells	2.20991	5.21787e-06
1100			EHS25_006321	Catalyzes the conversion of D-ribulose 5-phosphate to formate and 3,4-dihydroxy-2-butanone 4-phosphate	0.716773	0.0407213
1101			EHS25_000362	Catalyzes the formation of 6,7-dimethyl-8- ribityllumazine by condensation of 5-amino-6-(D- ribitylamino)uracil with 3,4-dihydroxy-2-butanone 4-phosphate. This is the penultimate step in the biosynthesis of riboflavin	0.956825	0.0145316
1102			EHS25_006872	Catalyzes the oxidative decarboxylation of 6- phosphogluconate to ribulose 5-phosphate and CO(2), with concomitant reduction of NADP to NADPH	1.21865	0.000568399
1103			EHS25_001157	Catalyzes the reversible transfer of the terminal phosphate group between ATP and AMP. Plays an important role in cellular energy homeostasis and in adenine nucleotide metabolism. Adenylate kinase activity is critical for regulation of the phosphate utilization and the AMP de novo biosynthesis pathways	1.29587	0.0104971
1104			EHS25_005501	Catalyzes the transfer of a two-carbon ketol group from a ketose donor to an aldose acceptor, via a covalent intermediate with the cofactor thiamine pyrophosphate	0.754718	0.0295648
1105			EHS25_003338	Chaperone activator	1.09267	1.14199e-06
1106			EHS25_002892	CHCH domain	1.44404	0.00970764
1107			EHS25_005280	Choline/Carnitine o-acyltransferase	0.783445	0.0254996
1108			EHS25_001411	Clathrin-coated vesicle protein	0.613462	0.0171563
1109			EHS25_003242	Clp amino terminal domain, pathogenicity island component	1.16188	0.00112255
1110			EHS25_006433	coatomer protein	1.27563	0.00185134
1111			EHS25_009503	Cofilin/tropomyosin-type actin-binding protein	1.32894	5.82834e-07
1112			EHS25_003546	component of the eukaryotic translation initiation factor 3 (eIF-3) complex, which is involved in protein synthesis of a specialized repertoire of mRNAs and, together with other initiation factors, stimulates binding of mRNA and methionyl-tRNAi to the 40S ribosome. The eIF-3 complex specifically targets and initiates translation of a subset of mRNAs involved in cell proliferation	0.847022	5.81333e-05
1113			EHS25_003649	component of the eukaryotic translation initiation factor 3 (eIF-3) complex, which is involved in protein synthesis of a specialized repertoire of mRNAs and, together with other initiation factors, stimulates binding of mRNA and methionyl-tRNAi to the 40S ribosome. The eIF-3 complex specifically targets and initiates translation of a subset of mRNAs involved in cell proliferation	0.82925	0.0279526
1114			EHS25_005313	Component of the FACT complex, a general chromatin factor that acts to reorganize nucleosomes. The FACT complex is involved in multiple processes that require DNA as a template such as mRNA elongation, DNA replication and DNA repair. During transcription elongation the FACT complex acts as a histone chaperone that both destabilizes and restores nucleosomal structure. It facilitates the passage of…	1.27723	0.000339451
1115			EHS25_001263	Component of the MICOS complex, a large protein complex of the mitochondrial inner membrane that plays crucial roles in the maintenance of crista junctions, inner membrane architecture, and formation of contact sites to the outer membrane	0.936875	0.0147614
1116			EHS25_003150	Component of the MICOS complex, a large protein complex of the mitochondrial inner membrane that plays crucial roles in the maintenance of crista junctions, inner membrane architecture, and formation of contact sites to the outer membrane	1.63792	0.000253465
1117			EHS25_002726	Component of the microsomal membrane bound fatty acid elongation system, which produces the 26-carbon very long-chain fatty acids (VLCFA) from palmitate. Catalyzes the reduction of the 3-ketoacyl-CoA intermediate that is formed in each cycle of fatty acid elongation. VLCFAs serve as precursors for ceramide and sphingolipids	1.12094	0.00718552
1118			EHS25_006763	Component of the ribosome assembly machinery. Nuclear paralog of the ribosomal protein P0, it binds pre-60S subunits at an early stage of assembly in the nucleolus, and is replaced by P0 in cytoplasmic pre-60S subunits and mature 80S ribosomes	0.638298	0.0232234
1119			EHS25_006351	Coproporphyrinogen III oxidase	0.732793	0.00139805
1120			EHS25_003051	C-terminal, D2-small domain, of ClpB protein	1.13215	0.00308189
1121			EHS25_009438	CybS, succinate dehydrogenase cytochrome B small subunit	1.58683	2.21071e-05
1122			EHS25_000231	Cyclin, N-terminal domain	0.607654	0.0447291
1123			EHS25_006552	Cys/Met metabolism PLP-dependent enzyme	1.43807	0.000336268
1124			EHS25_007228	Cytidine and deoxycytidylate deaminase zinc-binding region	1.73856	0.000978065
1125			EHS25_003455	Cytochrome c oxidase biogenesis-related protein	0.688872	0.0340636
1126			EHS25_002568	Cytochrome c oxidase polypeptide iv, mitochondrial	3.00641	2.14999e-09
1127			EHS25_003540	Cytoplasmic phospholipase A2, catalytic subunit	2.24227	1.40155e-07
1128			EHS25_009715	Destroys radicals which are normally produced within the cells and which are toxic to biological systems	0.760069	0.0139686
1129			EHS25_003295	DHHC palmitoyltransferase	0.829134	0.00947426
1130			EHS25_002496	DKCLD (NUC011) domain	0.629653	0.0308133
1131			EHS25_010090	Domain of unknown function (DUF543)	1.44304	4.31611e-05
1132			EHS25_008372	EF-1 guanine nucleotide exchange domain	1.00816	0.00161193
1133			EHS25_004973	EF-hand, calcium binding motif	1.07217	0.00162803
1134			EHS25_001279	Electron transfer flavoprotein domain	0.781256	0.0289175
1135			EHS25_001280	Electron transfer flavoprotein domain	0.642773	3.34528e-05
1136			EHS25_001583	Electron transfer flavoprotein FAD-binding domain	1.04215	4.91817e-05
1137			EHS25_004386	Endonuclease/Exonuclease/phosphatase family	0.744026	6.03713e-06
1138			EHS25_007691	Endoplasmic Reticulum Oxidoreductin 1 (ERO1)	1.11774	0.00367366
1139			EHS25_006197	Endoplasmic reticulum protein ERp29, C-terminal domain	1.53861	0.000187896
1140			EHS25_008187	Erg28 like protein	0.809048	0.00251599
1141			EHS25_007883	Erv1 / Alr family	1.40577	1.75849e-07
1142			EHS25_010256	Erv1 / Alr family	1.38476	0.00627325
1143			EHS25_000540	Essential component of the PAM complex, a complex required for the translocation of transit peptide-containing proteins from the inner membrane into the mitochondrial matrix in an ATP-dependent manner	1.29938	0.00287768
1144			EHS25_008651	Essential subunit of the N-oligosaccharyl transferase (OST) complex which catalyzes the transfer of a high mannose oligosaccharide from a lipid-linked oligosaccharide donor to an asparagine residue within an Asn-X-Ser Thr consensus motif in nascent polypeptide chains	1.67194	8.62212e-08
1145			EHS25_005924	ESSS subunit of NADH:ubiquinone oxidoreductase (complex I)	0.877108	0.00969723
1146			EHS25_003569	ETC complex I subunit conserved region	0.763654	0.0340636
1147			EHS25_009395	ETC complex I subunit conserved region	0.828217	0.0154786
1148			EHS25_009211	FAD-dependent monooxygenase required for the C5-ring hydroxylation during ubiquinone biosynthesis. Catalyzes the hydroxylation of 3-polyprenyl-4-hydroxybenzoic acid to 3- polyprenyl-4,5-dihydroxybenzoic acid. The electrons required for the hydroxylation reaction may be funneled indirectly from NADPH via a ferredoxin ferredoxin reductase system to COQ6	1.54487	5.72884e-08
1149			EHS25_008653	Fatty acid desaturase	1.11766	0.0115649
1150			EHS25_002495	FGGY family of carbohydrate kinases, C-terminal domain	1.06242	0.00471391
1151			EHS25_006785	Fibrillarin	1.74576	1.74125e-07
1152			EHS25_006182	Fructose-1-6-bisphosphatase, N-terminal domain	1.02028	0.0390532
1153			EHS25_000712	Fructose-bisphosphate aldolase class-II	0.895659	0.023464
1154			EHS25_000135	Functions as component of the Arp2 3 complex which is involved in regulation of actin polymerization and together with an activating nucleation-promoting factor (NPF) mediates the formation of branched actin networks	1.8478	1.47724e-05
1155			EHS25_003221	Functions as component of the Arp2 3 complex which is involved in regulation of actin polymerization and together with an activating nucleation-promoting factor (NPF) mediates the formation of branched actin networks	0.89698	0.000274671
1156			EHS25_008746	Functions as component of the Arp2 3 complex which is involved in regulation of actin polymerization and together with an activating nucleation-promoting factor (NPF) mediates the formation of branched actin networks	1.00401	3.43216e-06
1157			EHS25_004649	Functions in the early steps of protein synthesis of a small number of specific mRNAs. Acts by directing the binding of methionyl-tRNAi to 40S ribosomal subunits. In contrast to the eIF- 2 complex, it binds methionyl-tRNAi to 40 S subunits in a codon- dependent manner, whereas the eIF-2 complex binds methionyl-tRNAi to 40 S subunits in a GTP-dependent manner. May act by impiging the expression of…	0.93929	1.04381e-05
1158			EHS25_006581	Galactokinase galactose-binding signature	1.68197	2.46665e-06
1159			EHS25_001651	Glucose inhibited division protein A	1.4267	0.000562487
1160			EHS25_008684	Glucosidase II beta subunit-like protein	0.787497	0.0254996
1161			EHS25_007676	Glycosyl hydrolase family 63 N-terminal domain	0.763231	0.0127494
1162			EHS25_003416	Glycosyl transferase family, a/b domain	0.756888	0.0314507
1163			EHS25_002163	Glycosyltransferase family 20	0.800086	0.0114059
1164			EHS25_007454	Glycosyltransferase like family	1.12694	0.00521252
1165			EHS25_000218	Glycosyltransferase sugar-binding region containing DXD motif	1.04056	0.000653137
1166			EHS25_006020	GMP synthase C terminal domain	0.636447	0.0156023
1167			EHS25_008823	Golgi phosphoprotein 3 (GPP34)	0.852045	0.0096963
1168			EHS25_003486	GPI biosynthesis protein family Pig-F	0.942932	0.0238571
1169			EHS25_001515	Heat shock protein HSP60	1.24331	0.00396761
1170			EHS25_003145	Heat shock protein sks2 (heat shock cognate protein hsc1)	1.26098	0.00152181
1171			EHS25_002348	Histidine biosynthesis trifunctional protein	0.883245	0.0084298
1172			EHS25_000766	Hydrolyzes a variety of simple alpha-D-galactoside as well as more complex molecules such as oligosaccharides and polysaccharides	1.60641	3.94045e-05
1173			EHS25_001387	Hydroxymethylglutaryl-coenzyme A reductase	0.942162	0.0273337
1174			EHS25_003111	Insulinase (Peptidase family M16)	1.40492	0.00593195
1175			EHS25_005995	Insulinase (Peptidase family M16)	0.77912	0.00474417
1176			EHS25_005205	integral component of mitochondrial inner membrane	0.926648	0.000549548
1177			EHS25_005778	Involved in biosynthesis of the thiamine precursor thiazole. Catalyzes the conversion of NAD and glycine to adenosine diphosphate 5-(2-hydroxyethyl)-4-methylthiazole-2-carboxylic acid (ADT), an adenylated thiazole intermediate. The reaction includes an iron-dependent sulfide transfer from a conserved cysteine residue of the protein to a thiazole intermediate. The enzyme can only undergo a single …	1.3948	0.000480479
1178			EHS25_005194	Isocitrate/isopropylmalate dehydrogenase	1.1604	0.00039983
1179			EHS25_008768	Isocitrate/isopropylmalate dehydrogenase	0.689669	0.000811933
1180			EHS25_009046	JAB/MPN domain	0.594646	0.0151647
1181			EHS25_000361	Ketol-acid reductoisomerase	1.34148	2.69112e-05
1182			EHS25_002770	Key enzyme for ketone body catabolism. Transfers the CoA moiety from succinate to acetoacetate. Formation of the enzyme-CoA intermediate proceeds via an unstable anhydride species formed between the carboxylate groups of the enzyme and substrate	1.12253	0.00225732
1183			EHS25_001192	Kinase associated domain 1	1.12476	0.0068605
1184			EHS25_007585	lactate/malate dehydrogenase, NAD binding domain	1.60861	0.00769703
1185			EHS25_000245	Links covalently the heme group to the apoprotein of cytochrome c	0.923649	0.00316255
1186			EHS25_006152	Links covalently the heme group to the apoprotein of cytochrome c	1.81212	0.0148473
1187			EHS25_007688	Low temperature viability protein	1.08028	5.51943e-05
1188			EHS25_009578	Male sterility protein	0.794075	0.000312635
1189			EHS25_000506	Malic enzyme, NAD binding domain	0.738483	0.0138218
1190			EHS25_005943	Methyltransferase required for the conversion of 2- polyprenyl-6-methoxy-1,4-benzoquinol (DDMQH2) to 2-polyprenyl-3- methyl-6-methoxy-1,4-benzoquinol (DMQH2)	0.646531	0.0287782
1191			EHS25_003816	Microsomal signal peptidase 25 kDa subunit (SPC25)	0.896129	0.0347832
1192			EHS25_003592	minichromosome maintenance proteins	0.920464	0.000421093
1193			EHS25_001609	MIR domain	0.612902	0.0423787
1194			EHS25_008748	MIR domain	0.628997	0.00533125
1195			EHS25_008150	Mitochondrial ATP synthase g subunit	1.27331	7.05885e-06
1196			EHS25_007588	Mitochondrial import protein Pam17	1.1241	0.00749554
1197			EHS25_008804	Mitochondrial import receptor subunit Tom22	1.30256	3.29091e-05
1198			EHS25_006571	Mitochondrial membrane ATP synthase (F(1)F(0) ATP synthase or Complex V) produces ATP from ADP in the presence of a proton gradient across the membrane which is generated by electron transport complexes of the respiratory chain. F-type ATPases consist of two structural domains, F(1) - containing the extramembraneous catalytic core, and F(0) - containing the membrane proton channel, linked togethe…	2.11225	2.46665e-06
1199			EHS25_005227	Mitochondrial ribosomal death-associated protein 3	2.18143	3.96177e-05
1200			EHS25_004098	Mitochondrial ribosomal protein L51 / S25 / CI-B8 domain	0.829787	0.0154504
1201			EHS25_008300	NAD-dependent glycerol-3-phosphate dehydrogenase N-terminus	0.638472	5.84564e-05
1202			EHS25_005963	NADH pyrophosphatase-like rudimentary NUDIX domain	1.03094	0.000144595
1203			EHS25_006538	nam9 protein, mitochondrial	0.83737	0.0125882
1204			EHS25_008524	NDK	2.95661	2.62361e-06
1205			EHS25_000800	Oligosaccharyltransferase subunit Ribophorin II	1.43073	5.05042e-05
1206			EHS25_006449	O-methyltransferase that catalyzes the 2 O-methylation steps in the ubiquinone biosynthetic pathway	0.998256	0.000635003
1207			EHS25_010095	otu-domain-containing protein	1.45918	0.000157606
1208			EHS25_002678	Outer mitochondrial membrane transport complex protein	1.10799	0.00215095
1209			EHS25_007063	participates in several chromatin remodeling complexes, including the SWR1 and the INO80 complexes	1.40525	3.08516e-05
1210			EHS25_007315	Peptidase family M20/M25/M40	0.953493	0.00731076
1211			EHS25_003560	Peroxisomal membrane anchor protein (Pex14p) conserved region	1.003	0.0140337
1212			EHS25_009226	Phosphoenolpyruvate carboxykinase	1.55435	8.92257e-06
1213			EHS25_006229	Phosphoglycerate kinase	0.775215	0.00869269
1214			EHS25_005951	PI31 proteasome regulator	1.52194	0.049416
1215			EHS25_006004	PPIases accelerate the folding of proteins. It catalyzes the cis-trans isomerization of proline imidic peptide bonds in oligopeptides	1.05913	0.00424784
1216			EHS25_009465	PPIases accelerate the folding of proteins. It catalyzes the cis-trans isomerization of proline imidic peptide bonds in oligopeptides	1.71073	3.25986e-06
1217			EHS25_008382	PPIC-type PPIASE domain	1.00793	0.0292609
1218			EHS25_009660	PRELI-like family	0.830063	0.00197677
1219			EHS25_000326	Produces ATP from ADP in the presence of a proton gradient across the membrane	2.90272	3.61183e-16
1220			EHS25_009987	proteasome assembly	1.50592	2.42742e-05
1221			EHS25_008387	Proteasome beta subunits C terminal	1.20426	1.25881e-06
1222			EHS25_003600	Proteasome/cyclosome repeat	0.80897	0.000196458
1223			EHS25_008143	Protein disulfide isomerase	1.09936	0.00973287
1224			EHS25_010025	Protein prenyltransferase alpha subunit repeat	1.03906	0.000196458
1225			EHS25_004401	pseudouridylate synthase 4	1.09307	0.00197677
1226			EHS25_005993	pyruvate dehydrogenase protein x component, mitochondrial	1.356	0.00252623
1227			EHS25_006580	racemase and epimerase activity, acting on carbohydrates and derivatives	0.590875	0.0424651
1228			EHS25_006808	Ras of Complex, Roc, domain of DAPkinase	0.689654	0.00353669
1229			EHS25_004117	regulation of protein import into mitochondrial outer membrane	0.668859	0.0196605
1230			EHS25_003157	Regulator of type 1 phosphatases which maintains protein phosphatase activity under strict control	1.21203	0.000517076
1231			EHS25_000597	Removes 5-oxoproline from various penultimate amino acid residues except L-proline	0.805056	0.0195927
1232			EHS25_003420	Required both for recombination and for the repair of DNA damage caused by X-rays	0.870002	0.00446929
1233			EHS25_009273	Response to drug-related protein	0.658339	0.00340161
1234			EHS25_004547	Retrograde transport, endosome to Golgi-related protein	0.701809	0.0428345
1235			EHS25_007824	Ribonuclease-III-like	1.43714	8.51847e-05
1236			EHS25_001489	Ribose 5-phosphate isomerase A (phosphoriboisomerase A)	1.46188	1.86528e-06
1237			EHS25_005025	Ribosomal L29 protein	0.642531	0.0322616
1238			EHS25_005041	Ribosomal L30 N-terminal domain	0.826791	0.00342152
1239			EHS25_004206	Ribosomal L38e protein family	1.33466	0.00270265
1240			EHS25_004432	ribosomal L5P family C-terminus	1.6634	0.00020127
1241			EHS25_009335	Ribosomal protein L13	1.10987	0.0496708
1242			EHS25_008705	Ribosomal protein L14	1.12648	0.00379697
1243			EHS25_006096	Ribosomal protein L34e	1.44568	0.00194091
1244			EHS25_009388	Ribosomal protein S14p/S29e	2.36319	0.000663547
1245			EHS25_003683	Ribosomal protein S16	0.727514	0.00833317
1246			EHS25_010009	Ribosomal protein S24e	0.642573	0.0127605
1247			EHS25_004148	Ribosomal protein S8	1.06068	0.013948
1248			EHS25_005088	Ribulose-phosphate 3 epimerase family	1.38499	0.00184137
1249			EHS25_003711	RNA-binding component of the eukaryotic translation initiation factor 3 (eIF-3) complex, which is involved in protein synthesis of a specialized repertoire of mRNAs and, together with other initiation factors, stimulates binding of mRNA and methionyl-tRNAi to the 40S ribosome. The eIF-3 complex specifically targets and initiates translation of a subset of mRNAs involved in cell proliferation. Thi…	1.27641	5.72907e-06
1250			EHS25_008247	RTA1 like protein	0.729145	0.00279657
1251			EHS25_007821	S25 ribosomal protein	0.8657	0.0057741
1252			EHS25_006465	Scaffold protein for the de novo synthesis of iron- sulfur (Fe-S) clusters within mitochondria, which is required for maturation of both mitochondrial and cytoplasmic 2Fe-2S and 4Fe-4S proteins	0.903599	2.38689e-06
1253			EHS25_004415	SCO1/SenC	1.15744	3.29091e-05
1254			EHS25_008104	Sec63 Brl domain	0.798732	0.00629469
1255			EHS25_006503	SelR domain	1.03373	1.6692e-06
1256			EHS25_003211	Serine aminopeptidase, S33	1.26062	0.000907015
1257			EHS25_008471	SNF2 family N-terminal domain	0.677937	0.0169483
1258			EHS25_003503	Squalene/phytoene synthase	1.42852	0.0286154
1259			EHS25_008081	Squalene/phytoene synthase	0.752526	0.00231956
1260			EHS25_003446	structural constituent of ribosome	0.857014	0.000320393
1261			EHS25_006046	Succinyl-CoA synthetase functions in the citric acid cycle (TCA), coupling the hydrolysis of succinyl-CoA to the synthesis of ATP and thus represents the only step of substrate- level phosphorylation in the TCA. The beta subunit provides nucleotide specificity of the enzyme and binds the substrate succinate, while the binding sites for coenzyme A and phosphate are found in the alpha subunit	1.17655	0.000498629
1262			EHS25_008870	Syntaxin-5 N-terminal, Sly1p-binding domain	0.999779	0.0128626
1263			EHS25_006271	TATA box binding protein associated factor	1.09954	0.00838766
1264			EHS25_006676	TCP-1/cpn60 chaperonin family	1.05955	0.00522279
1265			EHS25_003832	The coatomer is a cytosolic protein complex that binds to dilysine motifs and reversibly associates with Golgi non- clathrin-coated vesicles, which further mediate biosynthetic protein transport from the ER, via the Golgi up to the trans Golgi network	1.16857	0.000487981
1266			EHS25_001473	The coatomer is a cytosolic protein complex that binds to dilysine motifs and reversibly associates with Golgi non- clathrin-coated vesicles, which further mediate biosynthetic protein transport from the ER, via the Golgi up to the trans Golgi network. Coatomer complex is required for budding from Golgi membranes, and is essential for the retrograde Golgi-to-ER transport of dilysine-tagged protei…	0.806265	0.00294135
1267			EHS25_010206	The coatomer is a cytosolic protein complex that binds to dilysine motifs and reversibly associates with Golgi non- clathrin-coated vesicles, which further mediate biosynthetic protein transport from the ER, via the Golgi up to the trans Golgi network. Coatomer complex is required for budding from Golgi membranes, and is essential for the retrograde Golgi-to-ER transport of dilysine-tagged protei…	0.719575	3.29091e-05
1268			EHS25_010264	The coatomer is a cytosolic protein complex that binds to dilysine motifs and reversibly associates with Golgi non- clathrin-coated vesicles, which further mediate biosynthetic protein transport from the ER, via the Golgi up to the trans Golgi network. The coatomer complex is required for budding from Golgi membranes, and is essential for the retrograde Golgi-to-ER transport of dilysine-tagged pr…	1.23021	2.94633e-05
1269			EHS25_002294	The pyruvate dehydrogenase complex catalyzes the overall conversion of pyruvate to acetyl-CoA and CO(2)	1.21964	0.0164928
1270			EHS25_008610	Thiamine pyrophosphate enzyme, N-terminal TPP binding domain	0.871727	0.00353179
1271			EHS25_005252	Thiolase, N-terminal domain	1.1789	0.000450048
1272			EHS25_007958	thiol-dependent ubiquitin-specific protease activity	1.61686	0.0459501
1273			EHS25_009400	Thioredoxin-like domain	1.02394	5.69911e-05
1274			EHS25_010205	thiosulfate sulfurtransferase	0.852293	0.0417161
1275			EHS25_001676	This enzyme is required for electron transfer from NADP to cytochrome P450 in microsomes. It can also provide electron transfer to heme oxygenase and cytochrome B5. Involved in ergosterol biosynthesis	0.710507	0.0124155
1276			EHS25_007923	This enzyme is required for electron transfer from NADP to cytochrome P450 in microsomes. It can also provide electron transfer to heme oxygenase and cytochrome B5. Involved in ergosterol biosynthesis	8.90935	0.0290749
1277			EHS25_007656	This protein promotes the GTP-dependent binding of aminoacyl-tRNA to the A-site of ribosomes during protein biosynthesis	1.02502	0.00480221
1278			EHS25_007689	Tim10/DDP family zinc finger	2.00402	0.000828886
1279			EHS25_001496	Tim17/Tim22/Tim23/Pmp24 family	0.989206	0.00853421
1280			EHS25_002286	to TIGR gene model	1.84564	9.51941e-05
1281			EHS25_007487	Transketolase, pyrimidine binding domain	1.98758	5.42715e-11
1282			EHS25_009317	Trehalose-phosphatase	0.668886	0.000696043
1283			EHS25_000456	Ubiquinol-cytochrome C reductase hinge protein	1.96198	2.52593e-05
1284			EHS25_004186	Ubiquitin homologues	1.12376	4.85532e-05
1285			EHS25_007993	Uncharacterised protein family (UPF0121)	1.2134	0.000281446
1286			EHS25_002596	VIT family	1.5058	0.000602343
1287			EHS25_009194	Voltage-gated potassium channel beta-2 subunit	0.881064	0.00168445
1288			EHS25_004118	WD domain, G-beta repeat	0.806713	0.00523283
1289			EHS25_009677	WD domain, G-beta repeat	1.06979	2.77647e-10
1290			EHS25_003502	WD40 repeats	0.778537	0.000529715
1291			EHS25_008415	Zinc-finger domain	0.941825	0.00120531
1292		GO:0044429	EHS25_010108	ACT domain	1.25705	4.75172e-05
1293		mitochondrial part	EHS25_005392	Adenylate kinase, active site lid	1.0702	0.000230421
1294			EHS25_006279	ATP synthase	1.43513	0.00122379
1295			EHS25_001682	ATP synthase complex subunit h	3.21046	4.42945e-08
1296			EHS25_000717	ATP synthase, Delta/Epsilon chain, beta-sandwich domain	2.02129	0.000311019
1297			EHS25_009006	Belongs to the aldehyde dehydrogenase family	1.40476	0.0140161
1298			EHS25_008483	Belongs to the small Tim family	1.13659	0.00109323
1299			EHS25_004317	Belongs to the TRAFAC class dynamin-like GTPase superfamily. Dynamin Fzo YdjA family	0.64725	0.0340038
1300			EHS25_005248	catalytic domain of ctd-like phosphatases	1.35205	5.85666e-05
1301			EHS25_006321	Catalyzes the conversion of D-ribulose 5-phosphate to formate and 3,4-dihydroxy-2-butanone 4-phosphate	0.716773	0.0407213
1302			EHS25_000362	Catalyzes the formation of 6,7-dimethyl-8- ribityllumazine by condensation of 5-amino-6-(D- ribitylamino)uracil with 3,4-dihydroxy-2-butanone 4-phosphate. This is the penultimate step in the biosynthesis of riboflavin	0.956825	0.0145316
1303			EHS25_001157	Catalyzes the reversible transfer of the terminal phosphate group between ATP and AMP. Plays an important role in cellular energy homeostasis and in adenine nucleotide metabolism. Adenylate kinase activity is critical for regulation of the phosphate utilization and the AMP de novo biosynthesis pathways	1.29587	0.0104971
1304			EHS25_002892	CHCH domain	1.44404	0.00970764
1305			EHS25_001263	Component of the MICOS complex, a large protein complex of the mitochondrial inner membrane that plays crucial roles in the maintenance of crista junctions, inner membrane architecture, and formation of contact sites to the outer membrane	0.936875	0.0147614
1306			EHS25_003150	Component of the MICOS complex, a large protein complex of the mitochondrial inner membrane that plays crucial roles in the maintenance of crista junctions, inner membrane architecture, and formation of contact sites to the outer membrane	1.63792	0.000253465
1307			EHS25_006351	Coproporphyrinogen III oxidase	0.732793	0.00139805
1308			EHS25_003051	C-terminal, D2-small domain, of ClpB protein	1.13215	0.00308189
1309			EHS25_009438	CybS, succinate dehydrogenase cytochrome B small subunit	1.58683	2.21071e-05
1310			EHS25_006552	Cys/Met metabolism PLP-dependent enzyme	1.43807	0.000336268
1311			EHS25_003455	Cytochrome c oxidase biogenesis-related protein	0.688872	0.0340636
1312			EHS25_002568	Cytochrome c oxidase polypeptide iv, mitochondrial	3.00641	2.14999e-09
1313			EHS25_010090	Domain of unknown function (DUF543)	1.44304	4.31611e-05
1314			EHS25_001279	Electron transfer flavoprotein domain	0.781256	0.0289175
1315			EHS25_001280	Electron transfer flavoprotein domain	0.642773	3.34528e-05
1316			EHS25_001583	Electron transfer flavoprotein FAD-binding domain	1.04215	4.91817e-05
1317			EHS25_010256	Erv1 / Alr family	1.38476	0.00627325
1318			EHS25_000540	Essential component of the PAM complex, a complex required for the translocation of transit peptide-containing proteins from the inner membrane into the mitochondrial matrix in an ATP-dependent manner	1.29938	0.00287768
1319			EHS25_003569	ETC complex I subunit conserved region	0.763654	0.0340636
1320			EHS25_009395	ETC complex I subunit conserved region	0.828217	0.0154786
1321			EHS25_009211	FAD-dependent monooxygenase required for the C5-ring hydroxylation during ubiquinone biosynthesis. Catalyzes the hydroxylation of 3-polyprenyl-4-hydroxybenzoic acid to 3- polyprenyl-4,5-dihydroxybenzoic acid. The electrons required for the hydroxylation reaction may be funneled indirectly from NADPH via a ferredoxin ferredoxin reductase system to COQ6	1.54487	5.72884e-08
1322			EHS25_003221	Functions as component of the Arp2 3 complex which is involved in regulation of actin polymerization and together with an activating nucleation-promoting factor (NPF) mediates the formation of branched actin networks	0.89698	0.000274671
1323			EHS25_001651	Glucose inhibited division protein A	1.4267	0.000562487
1324			EHS25_005995	Insulinase (Peptidase family M16)	0.77912	0.00474417
1325			EHS25_005205	integral component of mitochondrial inner membrane	0.926648	0.000549548
1326			EHS25_001192	Kinase associated domain 1	1.12476	0.0068605
1327			EHS25_007585	lactate/malate dehydrogenase, NAD binding domain	1.60861	0.00769703
1328			EHS25_000245	Links covalently the heme group to the apoprotein of cytochrome c	0.923649	0.00316255
1329			EHS25_006152	Links covalently the heme group to the apoprotein of cytochrome c	1.81212	0.0148473
1330			EHS25_005943	Methyltransferase required for the conversion of 2- polyprenyl-6-methoxy-1,4-benzoquinol (DDMQH2) to 2-polyprenyl-3- methyl-6-methoxy-1,4-benzoquinol (DMQH2)	0.646531	0.0287782
1331			EHS25_008150	Mitochondrial ATP synthase g subunit	1.27331	7.05885e-06
1332			EHS25_007588	Mitochondrial import protein Pam17	1.1241	0.00749554
1333			EHS25_008804	Mitochondrial import receptor subunit Tom22	1.30256	3.29091e-05
1334			EHS25_006571	Mitochondrial membrane ATP synthase (F(1)F(0) ATP synthase or Complex V) produces ATP from ADP in the presence of a proton gradient across the membrane which is generated by electron transport complexes of the respiratory chain. F-type ATPases consist of two structural domains, F(1) - containing the extramembraneous catalytic core, and F(0) - containing the membrane proton channel, linked togethe…	2.11225	2.46665e-06
1335			EHS25_004098	Mitochondrial ribosomal protein L51 / S25 / CI-B8 domain	0.829787	0.0154504
1336			EHS25_006449	O-methyltransferase that catalyzes the 2 O-methylation steps in the ubiquinone biosynthetic pathway	0.998256	0.000635003
1337			EHS25_002678	Outer mitochondrial membrane transport complex protein	1.10799	0.00215095
1338			EHS25_009465	PPIases accelerate the folding of proteins. It catalyzes the cis-trans isomerization of proline imidic peptide bonds in oligopeptides	1.71073	3.25986e-06
1339			EHS25_009660	PRELI-like family	0.830063	0.00197677
1340			EHS25_000326	Produces ATP from ADP in the presence of a proton gradient across the membrane	2.90272	3.61183e-16
1341			EHS25_005993	pyruvate dehydrogenase protein x component, mitochondrial	1.356	0.00252623
1342			EHS25_003157	Regulator of type 1 phosphatases which maintains protein phosphatase activity under strict control	1.21203	0.000517076
1343			EHS25_003420	Required both for recombination and for the repair of DNA damage caused by X-rays	0.870002	0.00446929
1344			EHS25_007824	Ribonuclease-III-like	1.43714	8.51847e-05
1345			EHS25_009388	Ribosomal protein S14p/S29e	2.36319	0.000663547
1346			EHS25_004148	Ribosomal protein S8	1.06068	0.013948
1347			EHS25_006465	Scaffold protein for the de novo synthesis of iron- sulfur (Fe-S) clusters within mitochondria, which is required for maturation of both mitochondrial and cytoplasmic 2Fe-2S and 4Fe-4S proteins	0.903599	2.38689e-06
1348			EHS25_004415	SCO1/SenC	1.15744	3.29091e-05
1349			EHS25_003446	structural constituent of ribosome	0.857014	0.000320393
1350			EHS25_006676	TCP-1/cpn60 chaperonin family	1.05955	0.00522279
1351			EHS25_002294	The pyruvate dehydrogenase complex catalyzes the overall conversion of pyruvate to acetyl-CoA and CO(2)	1.21964	0.0164928
1352			EHS25_001676	This enzyme is required for electron transfer from NADP to cytochrome P450 in microsomes. It can also provide electron transfer to heme oxygenase and cytochrome B5. Involved in ergosterol biosynthesis	0.710507	0.0124155
1353			EHS25_007923	This enzyme is required for electron transfer from NADP to cytochrome P450 in microsomes. It can also provide electron transfer to heme oxygenase and cytochrome B5. Involved in ergosterol biosynthesis	8.90935	0.0290749
1354			EHS25_007689	Tim10/DDP family zinc finger	2.00402	0.000828886
1355			EHS25_001496	Tim17/Tim22/Tim23/Pmp24 family	0.989206	0.00853421
1356			EHS25_007487	Transketolase, pyrimidine binding domain	1.98758	5.42715e-11
1357			EHS25_000456	Ubiquinol-cytochrome C reductase hinge protein	1.96198	2.52593e-05
1358			EHS25_008415	Zinc-finger domain	0.941825	0.00120531
1359		GO:0051171	EHS25_004958	ABC transporter	-0.889808	0.00982687
1360		regulation of nitrogen compound metabolic process	EHS25_010197	Acetyltransferase (GNAT) family	-0.687387	0.00276514
1361			EHS25_009560	acylphosphatase activity	-1.08701	0.00378308
1362			EHS25_006402	Aft1 HRA domain	-1.09896	2.67429e-06
1363			EHS25_002872	Belongs to the cyclin family	-0.739508	0.0158345
1364			EHS25_003874	Belongs to the MYST (SAS MOZ) family	-0.903848	0.000468703
1365			EHS25_009325	Belongs to the MYST (SAS MOZ) family	-1.02373	0.00118241
1366			EHS25_000468	Belongs to the phosphatase 2A regulatory subunit B family	-1.13087	3.29091e-05
1367			EHS25_010075	Belongs to the protein kinase superfamily. RIO-type Ser Thr kinase family	-0.652017	0.00830711
1368			EHS25_002461	Belongs to the ubiquitin-conjugating enzyme family	-0.68792	0.0084042
1369			EHS25_006328	BFD-like [2Fe-2S] binding domain	-3.30151	7.89021e-05
1370			EHS25_006238	c6 finger domain protein	-0.867833	0.00996429
1371			EHS25_005173	Calcineurin-like phosphoesterase	-0.94787	1.02471e-05
1372			EHS25_001667	Catalyzes the hydroxylation of 2-polyprenyl-3-methyl-6- methoxy-1,4-benzoquinol (DMQH2) during ubiquinone biosynthesis. Has also a structural role in the COQ enzyme complex, stabilizing other COQ polypeptides	-0.661178	0.015258
1373			EHS25_009956	Component of the Mediator complex, a coactivator involved in the regulated transcription of nearly all RNA polymerase II-dependent genes. Mediator functions as a bridge to convey information from gene-specific regulatory proteins to the basal RNA polymerase II transcription machinery. Mediator is recruited to promoters by direct interactions with regulatory proteins and serves as a scaffold for t…	-1.07627	0.0105263
1374			EHS25_004451	Component of the post-replicative DNA mismatch repair system (MMR)	-0.697325	0.0458495
1375			EHS25_001852	Cyclin	-2.40154	0.00422819
1376			EHS25_006220	Cyclin	-0.781858	0.00665723
1377			EHS25_003850	DNA-binding transcription factor activity	-1.68129	0.00519831
1378			EHS25_004855	DNA-binding transcription factor activity	-2.06228	0.00138273
1379			EHS25_005362	DNA-binding transcription factor activity	-1.4101	0.0461764
1380			EHS25_005588	DNA-binding transcription factor activity	-0.78919	0.0212084
1381			EHS25_000338	DNA-binding transcription factor activity, RNA polymerase II-specific	-0.846694	0.00842136
1382			EHS25_000643	DNA-binding transcription factor activity, RNA polymerase II-specific	-1.06378	0.0155025
1383			EHS25_000810	DNA-binding transcription factor activity, RNA polymerase II-specific	-1.6324	0.00833317
1384			EHS25_005033	DNA-binding transcription factor activity, RNA polymerase II-specific	-1.0623	0.00080535
1385			EHS25_006441	DNA-binding transcription factor activity, RNA polymerase II-specific	-0.831664	0.000196458
1386			EHS25_007390	DNA-binding transcription factor activity, RNA polymerase II-specific	-1.10235	0.00107785
1387			EHS25_005990	DNA-dependent RNA polymerase catalyzes the transcription of DNA into RNA using the four ribonucleoside triphosphates as substrates	-1.22483	0.00137439
1388			EHS25_004481	Domain in histone families 1 and 5	-1.13103	0.00114272
1389			EHS25_003017	Domain in UVSB PI-3 kinase, MEI-41 and ESR-1	-0.804432	0.00175016
1390			EHS25_008085	Domain of unknown function (DUF3819)	-0.767374	0.00224294
1391			EHS25_001071	Extension to Ser/Thr-type protein kinases	-0.795401	0.00248243
1392			EHS25_008334	FACT complex subunit (SPT16/CDC68)	-0.71531	0.0163199
1393			EHS25_002646	F-Box protein	-0.821225	0.00135942
1394			EHS25_004362	Functions as component of the transcription regulatory histone acetylation (HAT) complexes SAGA, SALSA and ADA. SAGA is involved in RNA polymerase II-dependent transcriptional regulation	-0.629743	0.00440863
1395			EHS25_000861	Fungal specific transcription factor domain	-1.92427	0.000120031
1396			EHS25_001336	Fungal specific transcription factor domain	-1.18387	2.67429e-06
1397			EHS25_001589	Fungal specific transcription factor domain	-0.669282	0.0394985
1398			EHS25_001596	Fungal specific transcription factor domain	-1.62909	0.00210465
1399			EHS25_002160	Fungal specific transcription factor domain	-1.37504	0.0050641
1400			EHS25_002274	Fungal specific transcription factor domain	-1.96673	3.23032e-06
1401			EHS25_005165	Fungal specific transcription factor domain	-1.00731	0.0159315
1402			EHS25_005385	Fungal specific transcription factor domain	-0.788738	0.0302629
1403			EHS25_005719	Fungal specific transcription factor domain	-1.28676	0.00164086
1404			EHS25_005879	Fungal specific transcription factor domain	-0.826083	0.00194091
1405			EHS25_006358	Fungal specific transcription factor domain	-1.13652	0.000800705
1406			EHS25_006767	Fungal specific transcription factor domain	-1.35264	0.0011637
1407			EHS25_007093	Fungal specific transcription factor domain	-0.912515	0.0497407
1408			EHS25_007266	Fungal specific transcription factor domain	-0.972915	0.000742646
1409			EHS25_008794	Fungal specific transcription factor domain	-0.950687	0.0144965
1410			EHS25_009545	Fungal specific transcription factor domain	-0.601301	0.00890904
1411			EHS25_000856	GAL4-like Zn(II)2Cys6 (or C6 zinc) binuclear cluster DNA-binding domain	-1.61988	0.00138273
1412			EHS25_000909	GAL4-like Zn(II)2Cys6 (or C6 zinc) binuclear cluster DNA-binding domain	-1.02149	0.000473908
1413			EHS25_001881	GAL4-like Zn(II)2Cys6 (or C6 zinc) binuclear cluster DNA-binding domain	-1.39952	0.0309964
1414			EHS25_002650	GAL4-like Zn(II)2Cys6 (or C6 zinc) binuclear cluster DNA-binding domain	-1.29011	0.00375446
1415			EHS25_003461	GAL4-like Zn(II)2Cys6 (or C6 zinc) binuclear cluster DNA-binding domain	-0.896597	0.0304563
1416			EHS25_003795	GAL4-like Zn(II)2Cys6 (or C6 zinc) binuclear cluster DNA-binding domain	-0.854538	0.00786724
1417			EHS25_004784	GAL4-like Zn(II)2Cys6 (or C6 zinc) binuclear cluster DNA-binding domain	-4.17513	0.0497167
1418			EHS25_004795	GAL4-like Zn(II)2Cys6 (or C6 zinc) binuclear cluster DNA-binding domain	-2.23441	0.000383128
1419			EHS25_005590	GAL4-like Zn(II)2Cys6 (or C6 zinc) binuclear cluster DNA-binding domain	-2.39813	0.000118597
1420			EHS25_006492	GAL4-like Zn(II)2Cys6 (or C6 zinc) binuclear cluster DNA-binding domain	-0.713896	0.000138236
1421			EHS25_006735	GAL4-like Zn(II)2Cys6 (or C6 zinc) binuclear cluster DNA-binding domain	-2.65983	0.0161614
1422			EHS25_008380	GAL4-like Zn(II)2Cys6 (or C6 zinc) binuclear cluster DNA-binding domain	-1.34222	0.00409452
1423			EHS25_008449	GAL4-like Zn(II)2Cys6 (or C6 zinc) binuclear cluster DNA-binding domain	-0.783279	0.00117584
1424			EHS25_008911	GAL4-like Zn(II)2Cys6 (or C6 zinc) binuclear cluster DNA-binding domain	-0.870263	0.0375096
1425			EHS25_004992	Gtr1/RagA G protein conserved region	-1.16587	5.4913e-05
1426			EHS25_001377	Guanine deaminase	-0.905392	0.000234135
1427			EHS25_010049	G-X-X-X-Q-X-W domain-containing protein	-1.54813	0.00321316
1428			EHS25_005599	heat shock factor	-2.11552	1.25881e-06
1429			EHS25_006233	heat shock factor	-0.61849	0.000656124
1430			EHS25_004347	Helical and beta-bridge domain	-0.671036	0.00455275
1431			EHS25_004484	Histone deacetylase	-0.620359	0.0319126
1432			EHS25_002518	Histone-like transcription factor (CBF/NF-Y) and archaeal histone	-1.0294	0.0012142
1433			EHS25_002998	Histone-like transcription factor (CBF/NF-Y) and archaeal histone	-1.42417	9.27476e-07
1434			EHS25_001393	HMG-box domain	-0.778001	0.0195217
1435			EHS25_009802	Inhibitor of apoptosis-promoting Bax1	-0.592322	0.0490168
1436			EHS25_008566	Introduces a single-strand break via transesterification at a target site in duplex DNA. Releases the supercoiling and torsional tension of DNA introduced during the DNA replication and transcription by transiently cleaving and rejoining one strand of the DNA duplex. The scissile phosphodiester is attacked by the catalytic tyrosine of the enzyme, resulting in the formation of a DNA-(5'-phosphotyr…	-0.691652	0.00481175
1437			EHS25_001088	Kinase-like	-1.14826	0.00893466
1438			EHS25_001619	nitrogen assimilation transcription factor	-0.742967	0.0105263
1439			EHS25_009028	Nuclear mRNA splicing	-0.984056	7.49313e-06
1440			EHS25_002821	Nucleosome assembly protein I	-0.629427	0.000354353
1441			EHS25_006263	OPT oligopeptide transporter protein	-4.4729	1.44244e-11
1442			EHS25_001557	P21-Rho-binding domain	-0.662801	0.0103339
1443			EHS25_008947	pathway-specific nitrogen regulator	-2.74492	0.000330978
1444			EHS25_001144	Phytochrome region	-1.71411	1.69549e-08
1445			EHS25_007149	Phytochrome region	-0.791931	0.0229385
1446			EHS25_003880	Plays a complex role in regulating the basal catalytic activity of the alpha subunit	-0.670924	0.000413225
1447			EHS25_004486	Plays an essential role in initiation of the G0 program by preventing the degradation of specific nutrient-regulated mRNAs via the 5'-3' mRNA decay pathway	-0.824944	0.000206074
1448			EHS25_007327	Plays an essential role in initiation of the G0 program by preventing the degradation of specific nutrient-regulated mRNAs via the 5'-3' mRNA decay pathway	-1.67875	0.000348618
1449			EHS25_004151	PPIases accelerate the folding of proteins. It catalyzes the cis-trans isomerization of proline imidic peptide bonds in oligopeptides	-1.22026	2.47194e-06
1450			EHS25_007502	Promotes mitochondrial protein synthesis. May act as a fidelity factor of the translation reaction, by catalyzing a one- codon backward translocation of tRNAs on improperly translocated ribosomes. Binds to mitochondrial ribosomes in a GTP-dependent manner	-1.1291	0.00114272
1451			EHS25_003132	Proteasome subunit	-0.689208	0.00358276
1452			EHS25_009554	Putative zinc finger motif, C2HC5-type	-1.10798	4.16138e-06
1453			EHS25_003060	RNA dependent RNA polymerase	-0.902968	0.00514916
1454			EHS25_001889	Serine/Threonine protein kinases, catalytic domain	-1.77999	0.0128384
1455			EHS25_005109	Serine/Threonine protein kinases, catalytic domain	-0.763002	0.000248837
1456			EHS25_005271	Sister chromatid cohesion C-terminus	-0.683202	0.0195152
1457			EHS25_003358	Skp1 family, tetramerisation domain	-0.66518	0.0151216
1458			EHS25_008473	SNF2 family N-terminal domain	-1.03725	0.00653124
1459			EHS25_002424	Ssu72-like protein	-0.650899	0.0138868
1460			EHS25_008721	TIP41-like family	-0.882804	0.00504009
1461			EHS25_006975	to TIGR gene model, INSD accession	-4.2741	7.42225e-05
1462			EHS25_007260	to TIGR gene model, INSD accession AAW42701.1	-1.08587	0.000823188
1463			EHS25_008180	transcription initiation factor IIF subunit alpha	-1.2965	5.92082e-06
1464			EHS25_007671	Transcriptional repressor	-0.751152	0.0149536
1465			EHS25_001551	Ubiquitin carboxyl-terminal hydrolase	-1.12258	0.00150733
1466			EHS25_001003	Ubiquitin homologues	-0.739193	0.000823188
1467			EHS25_010172	Ubiquitin-conjugating enzyme E2, catalytic domain homologues	-0.753435	0.0209619
1468			EHS25_001599	WD domain, G-beta repeat	-0.803338	0.00135519
1469			EHS25_005026	XPC-binding domain	-0.825895	0.00101923
1470			EHS25_000181	zinc finger	-0.950662	0.0479672
1471			EHS25_009049	zinc ion binding	-1.27064	0.00316157
1472		GO:0005634	EHS25_002434	116 kDa U5 small nuclear ribonucleoprotein component N-terminus	-0.588835	0.0341559
1473		nucleus	EHS25_004313	2OG-Fe(II) oxygenase superfamily	-1.16621	3.77924e-05
1474			EHS25_010031	AAA domain	-0.82985	0.00744461
1475			EHS25_004958	ABC transporter	-0.889808	0.00982687
1476			EHS25_010197	Acetyltransferase (GNAT) family	-0.687387	0.00276514
1477			EHS25_008601	Actin	-0.636617	0.00139696
1478			EHS25_009560	acylphosphatase activity	-1.08701	0.00378308
1479			EHS25_006637	ALG6, ALG8 glycosyltransferase family	-0.877368	0.00613982
1480			EHS25_008302	arm repeat-containing protein	-0.611911	0.00764747
1481			EHS25_006177	ASF1 like histone chaperone	-0.938157	0.00996429
1482			EHS25_009236	ATP dependent DNA ligase C terminal region	-0.835806	0.00796727
1483			EHS25_004514	ATP-dependent DNA helicase	-0.781258	0.0227728
1484			EHS25_002145	Belongs to the cation transport ATPase (P-type) (TC 3.A.3) family. Type IV subfamily	-0.82406	0.000328985
1485			EHS25_002872	Belongs to the cyclin family	-0.739508	0.0158345
1486			EHS25_000168	Belongs to the membrane-bound acyltransferase family	-0.620005	0.0254787
1487			EHS25_003874	Belongs to the MYST (SAS MOZ) family	-0.903848	0.000468703
1488			EHS25_009325	Belongs to the MYST (SAS MOZ) family	-1.02373	0.00118241
1489			EHS25_004435	Belongs to the peptidase C19 family	-0.674508	0.00308804
1490			EHS25_000468	Belongs to the phosphatase 2A regulatory subunit B family	-1.13087	3.29091e-05
1491			EHS25_010075	Belongs to the protein kinase superfamily. RIO-type Ser Thr kinase family	-0.652017	0.00830711
1492			EHS25_000462	Belongs to the transthyretin family. 5-hydroxyisourate hydrolase subfamily	-0.891976	0.00200179
1493			EHS25_002461	Belongs to the ubiquitin-conjugating enzyme family	-0.68792	0.0084042
1494			EHS25_006328	BFD-like [2Fe-2S] binding domain	-3.30151	7.89021e-05
1495			EHS25_006822	BRCT domain, a BRCA1 C-terminus domain	-0.931217	0.0234327
1496			EHS25_000344	Bromodomain and PHD finger-containing protein 3	-0.739939	9.27476e-07
1497			EHS25_002627	BSD domain	-0.725081	0.0013302
1498			EHS25_004262	BUD22	-0.741863	0.0280564
1499			EHS25_006645	C4-type zinc-finger of DNA polymerase delta	-1.01424	0.000540471
1500			EHS25_006238	c6 finger domain protein	-0.867833	0.00996429
1501			EHS25_001456	CAAX prenyl protease N-terminal, five membrane helices	-0.946048	0.000115879
1502			EHS25_005173	Calcineurin-like phosphoesterase	-0.94787	1.02471e-05
1503			EHS25_000751	Catalyzes the formation of N(7)-methylguanine at position 46 (m7G46) in tRNA	-0.996896	0.00154443
1504			EHS25_010084	Chitin synthase	-0.748441	0.0050941
1505			EHS25_009609	Chromatin organization modifier domain	-0.859639	0.0215166
1506			EHS25_009956	Component of the Mediator complex, a coactivator involved in the regulated transcription of nearly all RNA polymerase II-dependent genes. Mediator functions as a bridge to convey information from gene-specific regulatory proteins to the basal RNA polymerase II transcription machinery. Mediator is recruited to promoters by direct interactions with regulatory proteins and serves as a scaffold for t…	-1.07627	0.0105263
1507			EHS25_004451	Component of the post-replicative DNA mismatch repair system (MMR)	-0.697325	0.0458495
1508			EHS25_000446	C-terminal region of MMR_HSR1 domain	-0.623649	0.0348995
1509			EHS25_010002	Cullin	-0.791061	0.000435855
1510			EHS25_010177	Cupin-like domain	-0.590834	0.0177073
1511			EHS25_006379	cwf21	-0.958568	4.9805e-06
1512			EHS25_001852	Cyclin	-2.40154	0.00422819
1513			EHS25_006220	Cyclin	-0.781858	0.00665723
1514			EHS25_000259	Cytidylyltransferase-like	-0.786997	8.22214e-05
1515			EHS25_008321	DASH complex subunit Dad4	-0.796123	0.0161435
1516			EHS25_005343	D-isomer specific 2-hydroxyacid dehydrogenase, NAD binding domain	-1.86151	0.0323618
1517			EHS25_006762	DNA binding	-0.939518	0.000671373
1518			EHS25_001015	DNA polymerase subunit Cdc27	-0.73125	0.00916884
1519			EHS25_005362	DNA-binding transcription factor activity	-1.4101	0.0461764
1520			EHS25_005588	DNA-binding transcription factor activity	-0.78919	0.0212084
1521			EHS25_000338	DNA-binding transcription factor activity, RNA polymerase II-specific	-0.846694	0.00842136
1522			EHS25_000643	DNA-binding transcription factor activity, RNA polymerase II-specific	-1.06378	0.0155025
1523			EHS25_006441	DNA-binding transcription factor activity, RNA polymerase II-specific	-0.831664	0.000196458
1524			EHS25_005990	DNA-dependent RNA polymerase catalyzes the transcription of DNA into RNA using the four ribonucleoside triphosphates as substrates	-1.22483	0.00137439
1525			EHS25_004481	Domain in histone families 1 and 5	-1.13103	0.00114272
1526			EHS25_003017	Domain in UVSB PI-3 kinase, MEI-41 and ESR-1	-0.804432	0.00175016
1527			EHS25_008085	Domain of unknown function (DUF3819)	-0.767374	0.00224294
1528			EHS25_007633	Domain of unknown function (DUF4078)	-1.10169	0.0111813
1529			EHS25_009668	DUF4208	-0.740873	0.017553
1530			EHS25_009452	DUF4217	-1.05041	0.00483842
1531			EHS25_009432	Eukaryotic protein of unknown function (DUF846)	-0.62602	0.0458495
1532			EHS25_002293	Exosome component EXOSC1/CSL4	-0.6003	0.00988378
1533			EHS25_008334	FACT complex subunit (SPT16/CDC68)	-0.71531	0.0163199
1534			EHS25_002646	F-Box protein	-0.821225	0.00135942
1535			EHS25_004390	Ferrous iron transport protein B	-1.02644	0.0313434
1536			EHS25_009707	Fingers domain of DNA polymerase lambda	-0.590744	0.0228387
1537			EHS25_006364	Fumarylacetoacetate (FAA) hydrolase family	-1.10142	0.00330787
1538			EHS25_004362	Functions as component of the transcription regulatory histone acetylation (HAT) complexes SAGA, SALSA and ADA. SAGA is involved in RNA polymerase II-dependent transcriptional regulation	-0.629743	0.00440863
1539			EHS25_000631	Fungal specific transcription factor domain	-1.57567	0.0269033
1540			EHS25_000861	Fungal specific transcription factor domain	-1.92427	0.000120031
1541			EHS25_001336	Fungal specific transcription factor domain	-1.18387	2.67429e-06
1542			EHS25_001589	Fungal specific transcription factor domain	-0.669282	0.0394985
1543			EHS25_001596	Fungal specific transcription factor domain	-1.62909	0.00210465
1544			EHS25_002160	Fungal specific transcription factor domain	-1.37504	0.0050641
1545			EHS25_002274	Fungal specific transcription factor domain	-1.96673	3.23032e-06
1546			EHS25_005165	Fungal specific transcription factor domain	-1.00731	0.0159315
1547			EHS25_005385	Fungal specific transcription factor domain	-0.788738	0.0302629
1548			EHS25_006358	Fungal specific transcription factor domain	-1.13652	0.000800705
1549			EHS25_006767	Fungal specific transcription factor domain	-1.35264	0.0011637
1550			EHS25_007093	Fungal specific transcription factor domain	-0.912515	0.0497407
1551			EHS25_007094	Fungal specific transcription factor domain	-1.23202	0.00282605
1552			EHS25_007266	Fungal specific transcription factor domain	-0.972915	0.000742646
1553			EHS25_008794	Fungal specific transcription factor domain	-0.950687	0.0144965
1554			EHS25_009545	Fungal specific transcription factor domain	-0.601301	0.00890904
1555			EHS25_000856	GAL4-like Zn(II)2Cys6 (or C6 zinc) binuclear cluster DNA-binding domain	-1.61988	0.00138273
1556			EHS25_000909	GAL4-like Zn(II)2Cys6 (or C6 zinc) binuclear cluster DNA-binding domain	-1.02149	0.000473908
1557			EHS25_001881	GAL4-like Zn(II)2Cys6 (or C6 zinc) binuclear cluster DNA-binding domain	-1.39952	0.0309964
1558			EHS25_002650	GAL4-like Zn(II)2Cys6 (or C6 zinc) binuclear cluster DNA-binding domain	-1.29011	0.00375446
1559			EHS25_003461	GAL4-like Zn(II)2Cys6 (or C6 zinc) binuclear cluster DNA-binding domain	-0.896597	0.0304563
1560			EHS25_003795	GAL4-like Zn(II)2Cys6 (or C6 zinc) binuclear cluster DNA-binding domain	-0.854538	0.00786724
1561			EHS25_004784	GAL4-like Zn(II)2Cys6 (or C6 zinc) binuclear cluster DNA-binding domain	-4.17513	0.0497167
1562			EHS25_004795	GAL4-like Zn(II)2Cys6 (or C6 zinc) binuclear cluster DNA-binding domain	-2.23441	0.000383128
1563			EHS25_005590	GAL4-like Zn(II)2Cys6 (or C6 zinc) binuclear cluster DNA-binding domain	-2.39813	0.000118597
1564			EHS25_006492	GAL4-like Zn(II)2Cys6 (or C6 zinc) binuclear cluster DNA-binding domain	-0.713896	0.000138236
1565			EHS25_006735	GAL4-like Zn(II)2Cys6 (or C6 zinc) binuclear cluster DNA-binding domain	-2.65983	0.0161614
1566			EHS25_008380	GAL4-like Zn(II)2Cys6 (or C6 zinc) binuclear cluster DNA-binding domain	-1.34222	0.00409452
1567			EHS25_008449	GAL4-like Zn(II)2Cys6 (or C6 zinc) binuclear cluster DNA-binding domain	-0.783279	0.00117584
1568			EHS25_008911	GAL4-like Zn(II)2Cys6 (or C6 zinc) binuclear cluster DNA-binding domain	-0.870263	0.0375096
1569			EHS25_000465	GC-rich sequence DNA-binding factor-like protein	-0.703772	0.000333646
1570			EHS25_001072	Gtr1/RagA G protein conserved region	-0.629309	0.00420341
1571			EHS25_004992	Gtr1/RagA G protein conserved region	-1.16587	5.4913e-05
1572			EHS25_001377	Guanine deaminase	-0.905392	0.000234135
1573			EHS25_005599	heat shock factor	-2.11552	1.25881e-06
1574			EHS25_006233	heat shock factor	-0.61849	0.000656124
1575			EHS25_004347	Helical and beta-bridge domain	-0.671036	0.00455275
1576			EHS25_004157	Helicase associated domain (HA2) Add an annotation	-0.782252	0.000676292
1577			EHS25_008308	Helicase associated domain (HA2) Add an annotation	-0.799904	0.000399427
1578			EHS25_002092	helix loop helix domain	-0.947831	0.032314
1579			EHS25_004632	helix loop helix domain	-0.64004	0.0369216
1580			EHS25_004968	helix loop helix domain	-0.707429	0.0456947
1581			EHS25_005596	helix loop helix domain	-0.99728	0.00103127
1582			EHS25_003130	HIRAN domain	-0.967952	0.00045381
1583			EHS25_003346	HIRAN domain	-0.864432	0.0166889
1584			EHS25_004484	Histone deacetylase	-0.620359	0.0319126
1585			EHS25_002518	Histone-like transcription factor (CBF/NF-Y) and archaeal histone	-1.0294	0.0012142
1586			EHS25_002998	Histone-like transcription factor (CBF/NF-Y) and archaeal histone	-1.42417	9.27476e-07
1587			EHS25_009738	Histone-like transcription factor (CBF/NF-Y) and archaeal histone	-1.06833	0.000929138
1588			EHS25_001393	HMG-box domain	-0.778001	0.0195217
1589			EHS25_008049	hTAFII28-like protein conserved region	-0.6724	0.00200179
1590			EHS25_003114	impB/mucB/samB family C-terminal domain	-0.658286	0.0162676
1591			EHS25_009802	Inhibitor of apoptosis-promoting Bax1	-0.592322	0.0490168
1592			EHS25_008566	Introduces a single-strand break via transesterification at a target site in duplex DNA. Releases the supercoiling and torsional tension of DNA introduced during the DNA replication and transcription by transiently cleaving and rejoining one strand of the DNA duplex. The scissile phosphodiester is attacked by the catalytic tyrosine of the enzyme, resulting in the formation of a DNA-(5'-phosphotyr…	-0.691652	0.00481175
1593			EHS25_009935	Involved in autophagy and cytoplasm to vacuole transport (Cvt) vesicle formation. Plays a key role in the organization of the preautophagosomal structure phagophore assembly site (PAS), the nucleating site for formation of the sequestering vesicle	-0.707119	0.00445641
1594			EHS25_008820	JAB/MPN domain	-0.679186	0.0117455
1595			EHS25_001088	Kinase-like	-1.14826	0.00893466
1596			EHS25_009230	Ku70/Ku80 C-terminal arm	-1.38032	3.89825e-06
1597			EHS25_007846	Major Facilitator Superfamily	-1.04806	0.0459501
1598			EHS25_003470	metallochaperone-like domain	-0.889551	0.000381891
1599			EHS25_009054	Mis12 protein	-1.0881	0.00580241
1600			EHS25_009714	Mitosis protein DIM1	-1.45184	1.34144e-05
1601			EHS25_002039	monoubiquitination-related protein	-1.14486	0.000350657
1602			EHS25_002088	Mre11 complex	-0.906654	0.0243573
1603			EHS25_004381	mRNA (Guanine-N7-)-methyltransferase	-0.701374	0.0111314
1604			EHS25_001619	nitrogen assimilation transcription factor	-0.742967	0.0105263
1605			EHS25_004088	Noc2p family	-0.677845	0.0149108
1606			EHS25_000452	N-terminal domain of NEFA-interacting nuclear protein NIP30	-0.754201	0.00103437
1607			EHS25_008092	Nuclear mRNA splicing	-0.67304	0.0141057
1608			EHS25_009028	Nuclear mRNA splicing	-0.984056	7.49313e-06
1609			EHS25_002821	Nucleosome assembly protein I	-0.629427	0.000354353
1610			EHS25_001241	Nucleotidyltransferase domain	-0.929746	0.0141194
1611			EHS25_006263	OPT oligopeptide transporter protein	-4.4729	1.44244e-11
1612			EHS25_008947	pathway-specific nitrogen regulator	-2.74492	0.000330978
1613			EHS25_003880	Plays a complex role in regulating the basal catalytic activity of the alpha subunit	-0.670924	0.000413225
1614			EHS25_010150	Pol II transcription elongation factor	-0.86127	0.00252838
1615			EHS25_005309	Poly(A) polymerase predicted RNA binding domain	-1.05529	0.000714243
1616			EHS25_002464	Positively regulates the activity of the minus-end directed microtubule motor protein dynein. Plays a central role in positioning the mitotic spindle at the bud neck during cell division. Targets cytoplasmic dynein to microtubule plus ends, thereby promoting dynein-mediated microtubule sliding along the bud cortex and consequently the movement of the mitotic spindle to the bud neck	-0.766216	0.0132341
1617			EHS25_004151	PPIases accelerate the folding of proteins. It catalyzes the cis-trans isomerization of proline imidic peptide bonds in oligopeptides	-1.22026	2.47194e-06
1618			EHS25_004457	PPIases accelerate the folding of proteins. It catalyzes the cis-trans isomerization of proline imidic peptide bonds in oligopeptides	-0.757438	0.0060929
1619			EHS25_003049	Pre-mRNA splicing factor	-0.604788	0.00996199
1620			EHS25_010301	Pre-mRNA splicing Prp18-interacting factor	-0.877488	2.29716e-05
1621			EHS25_003132	Proteasome subunit	-0.689208	0.00358276
1622			EHS25_004078	Protein of unknown function (DUF775)	-0.931559	0.00364848
1623			EHS25_000469	Protein tyrosine kinase	-1.26119	0.000756096
1624			EHS25_004136	Protein tyrosine kinase	-0.924088	8.68616e-05
1625			EHS25_002517	PRP38 family	-0.866925	0.000624035
1626			EHS25_009554	Putative zinc finger motif, C2HC5-type	-1.10798	4.16138e-06
1627			EHS25_006617	Removes the N-terminal methionine from nascent proteins. The N-terminal methionine is often cleaved when the second residue in the primary sequence is small and uncharged (Met-Ala-, Cys, Gly, Pro, Ser, Thr, or Val)	-0.601684	0.00282198
1628			EHS25_003705	Replication factor RFC1 C terminal domain	-0.805568	0.00526618
1629			EHS25_002857	Required for endonucleolytic cleavage during polyadenylation-dependent pre-mRNA 3'-end formation	-0.920349	0.00554035
1630			EHS25_009126	Required for ribosome biogenesis. Part of a complex which catalyzes pseudouridylation of rRNA. This involves the isomerization of uridine such that the ribose is subsequently attached to C5, instead of the normal N1	-0.609174	0.0279526
1631			EHS25_008560	Ribosomal protein S4/S9 N-terminal domain	-0.811534	0.0159261
1632			EHS25_009427	Ribosomal protein S8e	-1.29381	1.77852e-05
1633			EHS25_003033	RNA 3'-terminal phosphate cyclase (RTC), insert domain	-1.18474	0.0025122
1634			EHS25_003060	RNA dependent RNA polymerase	-0.902968	0.00514916
1635			EHS25_006721	RNA polymerase III transcription factor (TF)IIIC subunit	-0.728708	0.0146463
1636			EHS25_004970	RNA polymerase Rpb5, N-terminal domain	-0.781127	0.00348934
1637			EHS25_004480	RNA recognition motif	-0.903682	0.00672385
1638			EHS25_003366	RNA recognition motif. (a.k.a. RRM, RBD, or RNP domain)	-0.703071	0.00885619
1639			EHS25_005476	Rrp44-like cold shock domain	-0.712595	0.0103339
1640			EHS25_002033	Rubisco LSMT substrate-binding	-0.938588	0.010028
1641			EHS25_000473	S-adenosyl-L-methionine-dependent methyltransferase that specifically methylates the N(1) position of an adenine present in helix 65 in 25S rRNA	-1.11009	0.000791984
1642			EHS25_005371	Sas10/Utp3/C1D family	-0.812815	0.012531
1643			EHS25_004512	Serine hydrolase (FSH1)	-1.00715	0.000922472
1644			EHS25_001889	Serine/Threonine protein kinases, catalytic domain	-1.77999	0.0128384
1645			EHS25_005109	Serine/Threonine protein kinases, catalytic domain	-0.763002	0.000248837
1646			EHS25_005137	Serine/Threonine protein kinases, catalytic domain	-0.982758	0.000204472
1647			EHS25_009250	Serine/Threonine protein kinases, catalytic domain	-0.609041	0.00427234
1648			EHS25_008764	Sir2 family	-0.7276	0.00520035
1649			EHS25_005271	Sister chromatid cohesion C-terminus	-0.683202	0.0195152
1650			EHS25_003358	Skp1 family, tetramerisation domain	-0.66518	0.0151216
1651			EHS25_008473	SNF2 family N-terminal domain	-1.03725	0.00653124
1652			EHS25_006067	SNF5 / SMARCB1 / INI1	-0.815243	8.65415e-05
1653			EHS25_002515	snRNP Sm proteins	-1.19031	1.62611e-05
1654			EHS25_006202	snRNP Sm proteins	-0.721779	0.00634594
1655			EHS25_005028	Sof1-like domain	-0.663513	0.0270604
1656			EHS25_007552	Specifically methylates the N1 position of guanosine-37 in various cytoplasmic and mitochondrial tRNAs. Methylation is not dependent on the nature of the nucleoside 5' of the target nucleoside. This is the first step in the biosynthesis of wybutosine (yW), a modified base adjacent to the anticodon of tRNAs and required for accurate decoding	-1.3309	0.000449084
1657			EHS25_002424	Ssu72-like protein	-0.650899	0.0138868
1658			EHS25_007753	Superoxide dismutase	-0.836746	0.0158151
1659			EHS25_005001	TAFII55 protein conserved region	-0.655672	0.0105263
1660			EHS25_006975	to TIGR gene model, INSD accession	-4.2741	7.42225e-05
1661			EHS25_007260	to TIGR gene model, INSD accession AAW42701.1	-1.08587	0.000823188
1662			EHS25_010039	Transcription factor Iwr1	-0.7991	5.64878e-05
1663			EHS25_002119	Transcription initiation factor IID, 18kD subunit	-2.19039	0.000791984
1664			EHS25_008180	transcription initiation factor IIF subunit alpha	-1.2965	5.92082e-06
1665			EHS25_008106	tRNA (Guanine-1)-methyltransferase	-0.863321	0.000133822
1666			EHS25_008475	tRNA synthetases class I (C) catalytic domain	-1.8111	9.98237e-05
1667			EHS25_002513	Tyrosyl-DNA phosphodiesterase	-0.979777	0.000394474
1668			EHS25_005946	U1 snRNP 70K protein (Short form)	-1.00541	0.000254681
1669			EHS25_008305	U3 snoRNA binding	-0.666946	0.0113068
1670			EHS25_001551	Ubiquitin carboxyl-terminal hydrolase	-1.12258	0.00150733
1671			EHS25_001003	Ubiquitin homologues	-0.739193	0.000823188
1672			EHS25_000318	Ubiquitin-activating enzyme active site	-0.593794	0.0355572
1673			EHS25_008641	Ubiquitin-conjugating enzyme E2, catalytic domain homologues	-0.702674	0.00521239
1674			EHS25_010172	Ubiquitin-conjugating enzyme E2, catalytic domain homologues	-0.753435	0.0209619
1675			EHS25_003131	Ubiquitin-like protein	-1.17233	9.98237e-05
1676			EHS25_003080	Utp25, U3 small nucleolar RNA-associated SSU processome protein 25	-0.859491	0.00397454
1677			EHS25_005738	Velvet factor	-0.959885	0.0202717
1678			EHS25_003023	VID27 cytoplasmic protein	-1.25843	0.00323206
1679			EHS25_001599	WD domain, G-beta repeat	-0.803338	0.00135519
1680			EHS25_005026	XPC-binding domain	-0.825895	0.00101923
1681			EHS25_002626	Xylanase inhibitor N-terminal	-1.26949	0.0108197
1682			EHS25_000181	zinc finger	-0.950662	0.0479672
1683			EHS25_000463	Zinc finger, C3HC4 type (RING finger)	-1.0979	0.0189718
1684			EHS25_001612	Zinc finger, C3HC4 type (RING finger)	-1.06372	0.00113315
1685			EHS25_007395	zinc ion binding	-0.649283	0.0155621
1686			EHS25_009049	zinc ion binding	-1.27064	0.00316157
1687			EHS25_002430	Zinc-finger of the MIZ type in Nse subunit	-0.806054	0.0241693
1688			EHS25_004366	Zn-finger in ubiquitin-hydrolases and other protein	-0.88244	0.000822962
1689	Xyl_46_70	GO:1990904	EHS25_008060	39S mitochondrial ribosomal protein L46	0.690164	0.046166
1690		ribonucleoprotein complex	EHS25_007601	AAA domain (dynein-related subfamily)	1.362	0.000496911
1691			EHS25_004508	ABC transporter	0.94559	0.000120504
1692			EHS25_008302	arm repeat-containing protein	1.00118	5.05751e-06
1693			EHS25_007623	Belongs to the class I-like SAM-binding methyltransferase superfamily. Protein arginine N- methyltransferase family	1.08683	0.000572138
1694			EHS25_008702	Belongs to the eukaryotic ribosomal protein eL20 family	0.664974	0.029863
1695			EHS25_000072	Belongs to the eukaryotic ribosomal protein P1 P2 family	1.5051	0.00251906
1696			EHS25_005042	Belongs to the eukaryotic ribosomal protein P1 P2 family	1.01769	0.0213187
1697			EHS25_010075	Belongs to the protein kinase superfamily. RIO-type Ser Thr kinase family	0.747631	0.0029505
1698			EHS25_002897	Belongs to the universal ribosomal protein uL1 family	1.2095	1.03406e-05
1699			EHS25_000995	Belongs to the universal ribosomal protein uL23 family	1.17115	8.90735e-05
1700			EHS25_001272	Belongs to the universal ribosomal protein uL3 family	0.61392	0.0467052
1701			EHS25_009776	Belongs to the universal ribosomal protein uS12 family	0.974571	0.0046616
1702			EHS25_001267	Belongs to the universal ribosomal protein uS19 family	0.846972	0.00929258
1703			EHS25_008172	Binds to the 23S rRNA	0.808087	0.0419689
1704			EHS25_004405	Brix	0.990749	1.45661e-08
1705			EHS25_010214	Bystin	1.17336	0.00022612
1706			EHS25_002451	component of the eukaryotic translation initiation factor 3 (eIF-3) complex, which is involved in protein synthesis of a specialized repertoire of mRNAs and, together with other initiation factors, stimulates binding of mRNA and methionyl-tRNAi to the 40S ribosome. The eIF-3 complex specifically targets and initiates translation of a subset of mRNAs involved in cell proliferation	0.914444	2.83114e-05
1707			EHS25_006647	Component of the NOP7 complex, which is required for maturation of the 25S and 5.8S ribosomal RNAs and formation of the 60S ribosome	1.32278	0.000101626
1708			EHS25_009955	Component of the NOP7 complex, which is required for maturation of the 25S and 5.8S ribosomal RNAs and formation of the 60S ribosome	1.32393	4.06794e-05
1709			EHS25_008217	C-terminal region of MMR_HSR1 domain	0.591811	0.0166843
1710			EHS25_010177	Cupin-like domain	0.846293	0.00053793
1711			EHS25_004974	DUF4217	0.71913	0.0190162
1712			EHS25_009452	DUF4217	1.60227	8.83565e-06
1713			EHS25_007274	GDP-fucose protein O-fucosyltransferase	2.38674	0.000165353
1714			EHS25_001543	GTPase that associates with pre-60S ribosomal subunits in the nucleolus and is required for their nuclear export and maturation	0.687081	0.0451247
1715			EHS25_005007	helicase superfamily c-terminal domain	0.676741	0.000577649
1716			EHS25_000689	metal ion binding	1.00389	0.000324769
1717			EHS25_003470	metallochaperone-like domain	1.12067	5.79038e-06
1718			EHS25_009251	Mitochondrial 39-S ribosomal protein L47 (MRP-L47)	1.03551	1.35917e-09
1719			EHS25_005139	Mitochondrial GTPase that catalyzes the GTP-dependent ribosomal translocation step during translation elongation. During this step, the ribosome changes from the pre-translocational (PRE) to the post-translocational (POST) state as the newly formed A- site-bound peptidyl-tRNA and P-site-bound deacylated tRNA move to the P and E sites, respectively. Catalyzes the coordinated movement of the two tR…	0.870721	5.67842e-05
1720			EHS25_000768	Mitochondrial ribosomal protein L27	0.844252	0.0110824
1721			EHS25_009199	Mitochondrial ribosomal protein L31	0.975503	0.0197603
1722			EHS25_002654	mitochondrial translation	0.898148	0.0108061
1723			EHS25_009714	Mitosis protein DIM1	0.984408	0.00663266
1724			EHS25_004100	Nascent polypeptide-associated complex subunit beta	0.667723	0.0164793
1725			EHS25_009036	Nrap protein nucleotidyltransferase domain 4	1.17345	0.00262058
1726			EHS25_009586	Nuclear transport factor 2 (NTF2) domain	0.762889	0.00231882
1727			EHS25_002313	P21-Rho-binding domain	1.36948	8.89848e-05
1728			EHS25_004457	PPIases accelerate the folding of proteins. It catalyzes the cis-trans isomerization of proline imidic peptide bonds in oligopeptides	0.68322	0.0212028
1729			EHS25_003020	Protein phosphatase 2A homologues, catalytic domain.	0.955517	0.000461435
1730			EHS25_008016	Pumilio-family RNA binding repeat	1.15423	0.0449932
1731			EHS25_006448	Required for proper 27S pre-rRNA processing and 60S ribosome subunit assembly	1.03228	0.0016465
1732			EHS25_009324	Required for proper assembly of pre-ribosomal particles during the biogenesis of the 60S ribosomal subunit	0.782202	0.0333858
1733			EHS25_009126	Required for ribosome biogenesis. Part of a complex which catalyzes pseudouridylation of rRNA. This involves the isomerization of uridine such that the ribose is subsequently attached to C5, instead of the normal N1	1.15555	8.3099e-06
1734			EHS25_009021	Required for the assembly and or stability of the 40S ribosomal subunit. Required for the processing of the 20S rRNA- precursor to mature 18S rRNA in a late step of the maturation of 40S ribosomal subunits	1.73188	5.84442e-06
1735			EHS25_005022	Ribosomal L27e protein family	1.18898	0.000673939
1736			EHS25_005025	Ribosomal L29 protein	0.748224	0.0156868
1737			EHS25_006591	Ribosomal L37ae protein family	1.49462	0.000118865
1738			EHS25_008144	Ribosomal large subunit proteins 60S L5, and 50S L18	1.01508	0.00175784
1739			EHS25_003335	ribosomal protein	0.913053	0.0151549
1740			EHS25_009913	ribosomal protein	1.09616	0.00473646
1741			EHS25_010253	Ribosomal protein 60S L18 and 50S L18e	0.81453	0.0187728
1742			EHS25_007790	Ribosomal protein L21e	0.765566	0.0179822
1743			EHS25_007632	Ribosomal protein L24e	1.57812	3.03124e-06
1744			EHS25_005223	Ribosomal protein L35	0.719556	0.00308998
1745			EHS25_007077	Ribosomal protein L6	0.929511	0.00535355
1746			EHS25_003833	Ribosomal protein L7Ae/L30e/S12e/Gadd45 family	0.748306	0.0415349
1747			EHS25_003894	Ribosomal protein P0 is the functional equivalent of E.coli protein L10	0.746214	0.0248796
1748			EHS25_008035	Ribosomal protein S17	0.733656	0.0278757
1749			EHS25_008560	Ribosomal protein S4/S9 N-terminal domain	1.27472	8.62833e-05
1750			EHS25_009092	Ribosomal proteins 50S-L15, 50S-L18e, 60S-L27A	0.90003	0.00010736
1751			EHS25_002009	Ribosomal Proteins L2, C-terminal domain	0.807205	0.0370674
1752			EHS25_002498	Ribosomal S17	0.972586	0.000766492
1753			EHS25_009392	Ribosomal_L32e	0.678304	0.0342599
1754			EHS25_001577	Ribosome biogenesis and assembly-related protein	1.37325	1.49803e-06
1755			EHS25_007447	Ribosome-associated complex head domain	0.685989	0.0248833
1756			EHS25_003033	RNA 3'-terminal phosphate cyclase (RTC), insert domain	1.06954	0.0105431
1757			EHS25_010057	RNA cytidine acetyltransferase with specificity toward both 18S rRNA and tRNAs. Catalyzes the formation of N(4)- acetylcytidine (ac4C) in 18S rRNA. Required for early nucleolar cleavages of precursor rRNA at sites A0, A1 and A2 during 18S rRNA synthesis. Catalyzes the formation of ac4C in serine and leucine tRNAs. Requires the tRNA-binding adapter protein TAN1 for full tRNA acetyltransferase acti…	1.21659	1.14059e-05
1758			EHS25_001548	RNA recognition motif. (a.k.a. RRM, RBD, or RNP domain)	0.819982	0.0317956
1759			EHS25_002515	snRNP Sm proteins	1.139	4.91441e-05
1760			EHS25_005946	U1 snRNP 70K protein (Short form)	0.760778	0.0108061
1761			EHS25_008134	Utp13 specific WD40 associated domain	1.3286	6.51932e-05
1762			EHS25_010302	Utp21 specific WD40 associated putative domain	0.979146	0.000994191
1763			EHS25_003080	Utp25, U3 small nucleolar RNA-associated SSU processome protein 25	1.1841	5.18933e-05
1764			EHS25_005010	WD domain, G-beta repeat	1.10732	0.000110836
1765		GO:0042254	EHS25_008302	arm repeat-containing protein	1.00118	5.05751e-06
1766		ribosome biogenesis	EHS25_009579	Belongs to the class I-like SAM-binding methyltransferase superfamily. RsmB NOP family	1.22838	3.9724e-05
1767			EHS25_010075	Belongs to the protein kinase superfamily. RIO-type Ser Thr kinase family	0.747631	0.0029505
1768			EHS25_002897	Belongs to the universal ribosomal protein uL1 family	1.2095	1.03406e-05
1769			EHS25_001272	Belongs to the universal ribosomal protein uL3 family	0.61392	0.0467052
1770			EHS25_001267	Belongs to the universal ribosomal protein uS19 family	0.846972	0.00929258
1771			EHS25_007562	BP28CT (NUC211) domain	1.22281	0.00036336
1772			EHS25_000150	Brix	1.37517	3.34148e-19
1773			EHS25_004405	Brix	0.990749	1.45661e-08
1774			EHS25_010214	Bystin	1.17336	0.00022612
1775			EHS25_007558	CBF/Mak21 family	1.04642	0.000994191
1776			EHS25_009272	CBF/Mak21 family	1.056	0.0125913
1777			EHS25_006647	Component of the NOP7 complex, which is required for maturation of the 25S and 5.8S ribosomal RNAs and formation of the 60S ribosome	1.32278	0.000101626
1778			EHS25_009955	Component of the NOP7 complex, which is required for maturation of the 25S and 5.8S ribosomal RNAs and formation of the 60S ribosome	1.32393	4.06794e-05
1779			EHS25_010177	Cupin-like domain	0.846293	0.00053793
1780			EHS25_010284	DNA-dependent RNA polymerase catalyzes the transcription of DNA into RNA using the four ribonucleoside triphosphates as substrates	1.22054	7.26937e-06
1781			EHS25_004974	DUF4217	0.71913	0.0190162
1782			EHS25_009452	DUF4217	1.60227	8.83565e-06
1783			EHS25_010007	Essential protein required for the accumulation of box C D snoRNA	0.914395	0.0352486
1784			EHS25_001543	GTPase that associates with pre-60S ribosomal subunits in the nucleolus and is required for their nuclear export and maturation	0.687081	0.0451247
1785			EHS25_001417	Involved in the biogenesis of the 60S ribosomal subunit	0.697206	0.000892979
1786			EHS25_003568	K homology RNA-binding domain	0.819958	0.0352541
1787			EHS25_000689	metal ion binding	1.00389	0.000324769
1788			EHS25_003470	metallochaperone-like domain	1.12067	5.79038e-06
1789			EHS25_003364	Methyltransferase involved in Williams-Beuren syndrome	0.823027	0.00668885
1790			EHS25_002039	monoubiquitination-related protein	1.48071	2.45655e-06
1791			EHS25_009036	Nrap protein nucleotidyltransferase domain 4	1.17345	0.00262058
1792			EHS25_006448	Required for proper 27S pre-rRNA processing and 60S ribosome subunit assembly	1.03228	0.0016465
1793			EHS25_009324	Required for proper assembly of pre-ribosomal particles during the biogenesis of the 60S ribosomal subunit	0.782202	0.0333858
1794			EHS25_009126	Required for ribosome biogenesis. Part of a complex which catalyzes pseudouridylation of rRNA. This involves the isomerization of uridine such that the ribose is subsequently attached to C5, instead of the normal N1	1.15555	8.3099e-06
1795			EHS25_009021	Required for the assembly and or stability of the 40S ribosomal subunit. Required for the processing of the 20S rRNA- precursor to mature 18S rRNA in a late step of the maturation of 40S ribosomal subunits	1.73188	5.84442e-06
1796			EHS25_005025	Ribosomal L29 protein	0.748224	0.0156868
1797			EHS25_006591	Ribosomal L37ae protein family	1.49462	0.000118865
1798			EHS25_008144	Ribosomal large subunit proteins 60S L5, and 50S L18	1.01508	0.00175784
1799			EHS25_003335	ribosomal protein	0.913053	0.0151549
1800			EHS25_009913	ribosomal protein	1.09616	0.00473646
1801			EHS25_003833	Ribosomal protein L7Ae/L30e/S12e/Gadd45 family	0.748306	0.0415349
1802			EHS25_003894	Ribosomal protein P0 is the functional equivalent of E.coli protein L10	0.746214	0.0248796
1803			EHS25_008560	Ribosomal protein S4/S9 N-terminal domain	1.27472	8.62833e-05
1804			EHS25_009427	Ribosomal protein S8e	1.48262	6.60442e-07
1805			EHS25_001577	Ribosome biogenesis and assembly-related protein	1.37325	1.49803e-06
1806			EHS25_006885	Ribosome biogenesis protein Nop16	1.09439	0.00482346
1807			EHS25_007447	Ribosome-associated complex head domain	0.685989	0.0248833
1808			EHS25_003033	RNA 3'-terminal phosphate cyclase (RTC), insert domain	1.06954	0.0105431
1809			EHS25_010057	RNA cytidine acetyltransferase with specificity toward both 18S rRNA and tRNAs. Catalyzes the formation of N(4)- acetylcytidine (ac4C) in 18S rRNA. Required for early nucleolar cleavages of precursor rRNA at sites A0, A1 and A2 during 18S rRNA synthesis. Catalyzes the formation of ac4C in serine and leucine tRNAs. Requires the tRNA-binding adapter protein TAN1 for full tRNA acetyltransferase acti…	1.21659	1.14059e-05
1810			EHS25_004416	RNA helicase	0.687446	0.0423511
1811			EHS25_004480	RNA recognition motif	1.36073	2.62083e-05
1812			EHS25_008156	RNA recognition motif	1.11446	0.0157603
1813			EHS25_007631	rRNA biogenesis protein RRP36	0.752723	0.00519394
1814			EHS25_000473	S-adenosyl-L-methionine-dependent methyltransferase that specifically methylates the N(1) position of an adenine present in helix 65 in 25S rRNA	0.861522	0.0170391
1815			EHS25_005371	Sas10/Utp3/C1D family	0.947991	0.00430635
1816			EHS25_002515	snRNP Sm proteins	1.139	4.91441e-05
1817			EHS25_007834	Suppressor of forked protein (Suf)	1.54188	2.64334e-05
1818			EHS25_006473	U3 small nucleolar RNA-associated protein 6	1.25998	0.000100449
1819			EHS25_008305	U3 snoRNA binding	0.943241	0.000255977
1820			EHS25_008134	Utp13 specific WD40 associated domain	1.3286	6.51932e-05
1821			EHS25_010302	Utp21 specific WD40 associated putative domain	0.979146	0.000994191
1822			EHS25_003080	Utp25, U3 small nucleolar RNA-associated SSU processome protein 25	1.1841	5.18933e-05
1823			EHS25_005010	WD domain, G-beta repeat	1.10732	0.000110836
1824			EHS25_008829	WD domain, G-beta repeat	0.805145	0.026419
1825		GO:0016072	EHS25_008302	arm repeat-containing protein	1.00118	5.05751e-06
1826		rRNA metabolic process	EHS25_009579	Belongs to the class I-like SAM-binding methyltransferase superfamily. RsmB NOP family	1.22838	3.9724e-05
1827			EHS25_010075	Belongs to the protein kinase superfamily. RIO-type Ser Thr kinase family	0.747631	0.0029505
1828			EHS25_002897	Belongs to the universal ribosomal protein uL1 family	1.2095	1.03406e-05
1829			EHS25_007562	BP28CT (NUC211) domain	1.22281	0.00036336
1830			EHS25_000150	Brix	1.37517	3.34148e-19
1831			EHS25_010214	Bystin	1.17336	0.00022612
1832			EHS25_006647	Component of the NOP7 complex, which is required for maturation of the 25S and 5.8S ribosomal RNAs and formation of the 60S ribosome	1.32278	0.000101626
1833			EHS25_009955	Component of the NOP7 complex, which is required for maturation of the 25S and 5.8S ribosomal RNAs and formation of the 60S ribosome	1.32393	4.06794e-05
1834			EHS25_004974	DUF4217	0.71913	0.0190162
1835			EHS25_009452	DUF4217	1.60227	8.83565e-06
1836			EHS25_010007	Essential protein required for the accumulation of box C D snoRNA	0.914395	0.0352486
1837			EHS25_000689	metal ion binding	1.00389	0.000324769
1838			EHS25_003364	Methyltransferase involved in Williams-Beuren syndrome	0.823027	0.00668885
1839			EHS25_002039	monoubiquitination-related protein	1.48071	2.45655e-06
1840			EHS25_009036	Nrap protein nucleotidyltransferase domain 4	1.17345	0.00262058
1841			EHS25_009324	Required for proper assembly of pre-ribosomal particles during the biogenesis of the 60S ribosomal subunit	0.782202	0.0333858
1842			EHS25_009126	Required for ribosome biogenesis. Part of a complex which catalyzes pseudouridylation of rRNA. This involves the isomerization of uridine such that the ribose is subsequently attached to C5, instead of the normal N1	1.15555	8.3099e-06
1843			EHS25_009021	Required for the assembly and or stability of the 40S ribosomal subunit. Required for the processing of the 20S rRNA- precursor to mature 18S rRNA in a late step of the maturation of 40S ribosomal subunits	1.73188	5.84442e-06
1844			EHS25_005025	Ribosomal L29 protein	0.748224	0.0156868
1845			EHS25_006591	Ribosomal L37ae protein family	1.49462	0.000118865
1846			EHS25_003335	ribosomal protein	0.913053	0.0151549
1847			EHS25_009913	ribosomal protein	1.09616	0.00473646
1848			EHS25_003833	Ribosomal protein L7Ae/L30e/S12e/Gadd45 family	0.748306	0.0415349
1849			EHS25_008560	Ribosomal protein S4/S9 N-terminal domain	1.27472	8.62833e-05
1850			EHS25_009427	Ribosomal protein S8e	1.48262	6.60442e-07
1851			EHS25_001577	Ribosome biogenesis and assembly-related protein	1.37325	1.49803e-06
1852			EHS25_006885	Ribosome biogenesis protein Nop16	1.09439	0.00482346
1853			EHS25_007447	Ribosome-associated complex head domain	0.685989	0.0248833
1854			EHS25_003033	RNA 3'-terminal phosphate cyclase (RTC), insert domain	1.06954	0.0105431
1855			EHS25_010057	RNA cytidine acetyltransferase with specificity toward both 18S rRNA and tRNAs. Catalyzes the formation of N(4)- acetylcytidine (ac4C) in 18S rRNA. Required for early nucleolar cleavages of precursor rRNA at sites A0, A1 and A2 during 18S rRNA synthesis. Catalyzes the formation of ac4C in serine and leucine tRNAs. Requires the tRNA-binding adapter protein TAN1 for full tRNA acetyltransferase acti…	1.21659	1.14059e-05
1856			EHS25_004416	RNA helicase	0.687446	0.0423511
1857			EHS25_008156	RNA recognition motif	1.11446	0.0157603
1858			EHS25_007631	rRNA biogenesis protein RRP36	0.752723	0.00519394
1859			EHS25_000473	S-adenosyl-L-methionine-dependent methyltransferase that specifically methylates the N(1) position of an adenine present in helix 65 in 25S rRNA	0.861522	0.0170391
1860			EHS25_005371	Sas10/Utp3/C1D family	0.947991	0.00430635
1861			EHS25_002515	snRNP Sm proteins	1.139	4.91441e-05
1862			EHS25_007834	Suppressor of forked protein (Suf)	1.54188	2.64334e-05
1863			EHS25_006473	U3 small nucleolar RNA-associated protein 6	1.25998	0.000100449
1864			EHS25_008134	Utp13 specific WD40 associated domain	1.3286	6.51932e-05
1865			EHS25_010302	Utp21 specific WD40 associated putative domain	0.979146	0.000994191
1866			EHS25_003080	Utp25, U3 small nucleolar RNA-associated SSU processome protein 25	1.1841	5.18933e-05
1867			EHS25_005010	WD domain, G-beta repeat	1.10732	0.000110836
1868			EHS25_008829	WD domain, G-beta repeat	0.805145	0.026419
1869		GO:0048038	EHS25_004711	amine oxidase	-7.17245	2.90085e-07
1870		quinone binding	EHS25_007667	Belongs to the complex I 20 kDa subunit family	-0.599937	0.0486361
1871			EHS25_004425	Belongs to the complex I 49 kDa subunit family	-0.840419	0.0138388
1872			EHS25_009009	Copper amine oxidase, N3 domain	-1.39429	0.000134962
1873			EHS25_009032	Copper amine oxidase, N3 domain	-7.58313	0.0111314
1874			EHS25_009865	Copper amine oxidase, N3 domain	-2.28782	0.000109064
1875			EHS25_009438	CybS, succinate dehydrogenase cytochrome B small subunit	-1.39051	0.000318014
1876		GO:1901565	EHS25_002593	AAA domain	-0.898607	0.00105861
1877		organonitrogen compound catabolic process	EHS25_003355	Alanine dehydrogenase/PNT, N-terminal domain	-1.20336	0.0139034
1878			EHS25_004263	Aldehyde dehydrogenase family	-1.94699	1.15028e-12
1879			EHS25_002131	Amidase	-1.2092	0.00172241
1880			EHS25_003771	Arginase family	-0.966061	0.000743331
1881			EHS25_002431	As part of the replication protein A (RPA RP-A), a single-stranded DNA-binding heterotrimeric complex, may play an essential role in DNA replication, recombination and repair. Binds and stabilizes single-stranded DNA intermediates, preventing complementary DNA reannealing and recruiting different proteins involved in DNA metabolism	-0.881085	0.0122307
1882			EHS25_010097	Belongs to the metallo-dependent hydrolases superfamily. Peptidase M19 family	-1.37647	0.000374642
1883			EHS25_004323	Belongs to the protein kinase superfamily	-0.671547	0.016909
1884			EHS25_007248	Beta-eliminating lyase	-1.32186	0.000353521
1885			EHS25_005979	Carboxypeptidase s	-1.90941	6.683e-07
1886			EHS25_002817	Converts proline to delta-1-pyrroline-5-carboxylate	-2.53608	8.28253e-10
1887			EHS25_009585	CSN8/PSMD8/EIF3K family	-1.09389	0.0222594
1888			EHS25_007228	Cytidine and deoxycytidylate deaminase zinc-binding region	-1.30491	0.0243745
1889			EHS25_008218	dUTP diphosphatase	-1.06724	0.0474584
1890			EHS25_004386	Endonuclease/Exonuclease/phosphatase family	-0.650943	0.000114125
1891			EHS25_004717	Enolase C-terminal domain-like protein	-8.97908	2.97086e-05
1892			EHS25_006588	ERAP1-like C-terminal domain	-0.652808	0.000528328
1893			EHS25_006600	FAD dependent oxidoreductase	-1.72426	0.0165903
1894			EHS25_009734	Gamma-glutamyltranspeptidase	-1.59192	0.000848938
1895			EHS25_007885	Glycosyl hydrolases family 18	-0.772222	0.00421744
1896			EHS25_001377	Guanine deaminase	-0.590972	0.0320415
1897			EHS25_003418	Methylcrotonoyl-Coenzyme A carboxylase 1	-1.3206	0.0255058
1898			EHS25_009310	Methylmalonate-semialdehyde dehydrogenase	-1.57165	4.52985e-05
1899			EHS25_006544	Peptidase dimerisation domain	-1.0806	0.000715455
1900			EHS25_009679	Peptidase dimerisation domain	-1.90606	0.000586928
1901			EHS25_003009	Peptidase family M20/M25/M40	-4.6233	7.20804e-05
1902			EHS25_003246	Peptidase family M20/M25/M40	-0.765704	0.0179822
1903			EHS25_008387	Proteasome beta subunits C terminal	-0.665005	0.0170663
1904			EHS25_000075	Proteasome subunit	-0.723208	0.000623867
1905			EHS25_002357	Proteasome subunit	-0.612498	0.0413981
1906			EHS25_002118	Proteasome subunit A N-terminal signature Add an annotation	-0.741586	0.0437306
1907			EHS25_006566	Proteasome subunit A N-terminal signature Add an annotation	-1.0613	0.00194865
1908			EHS25_003600	Proteasome/cyclosome repeat	-0.660609	0.00419339
1909			EHS25_007216	Proteasome/cyclosome repeat	-3.8928	0.0476665
1910			EHS25_004453	Snf7	-0.678088	0.00352673
1911			EHS25_006252	Taurine catabolism dioxygenase TauD, TfdA family	-2.04162	8.98862e-15
1912			EHS25_003585	This protein is an auxiliary protein of DNA polymerase delta and is involved in the control of eukaryotic DNA replication by increasing the polymerase's processibility during elongation of the leading strand	-1.00716	0.00349712
1913			EHS25_004186	Ubiquitin homologues	-0.770274	0.0110824
1914			EHS25_004251	Urease alpha-subunit, N-terminal domain	-0.732231	0.00421222
1915			EHS25_006040	Ureidoglycolate hydrolase	-1.67766	0.000210994
1916			EHS25_000368	Zn-finger in ubiquitin-hydrolases and other protein	-0.628145	0.00228067
1917		GO:0006637	EHS25_002397	diphosphomevalonate decarboxylase	-0.827801	0.00127183
1918		acyl-CoA metabolic process	EHS25_003355	Alanine dehydrogenase/PNT, N-terminal domain	-1.20336	0.0139034
1919			EHS25_003418	Methylcrotonoyl-Coenzyme A carboxylase 1	-1.3206	0.0255058
1920			EHS25_005889	Pfam:AHS1	-9.64506	0.000119094
1921			EHS25_006046	Succinyl-CoA synthetase functions in the citric acid cycle (TCA), coupling the hydrolysis of succinyl-CoA to the synthesis of ATP and thus represents the only step of substrate- level phosphorylation in the TCA. The beta subunit provides nucleotide specificity of the enzyme and binds the substrate succinate, while the binding sites for coenzyme A and phosphate are found in the alpha subunit	-0.781777	0.0398753
1922			EHS25_006372	This enzyme condenses acetyl-CoA with acetoacetyl-CoA to form HMG-CoA, which is the substrate for HMG-CoA reductase	-0.852213	0.0241539
1923			EHS25_007487	Transketolase, pyrimidine binding domain	-0.966766	0.00445736
1924			EHS25_008599	ATP citrate lyase citrate-binding	-0.918081	0.0211273
1925			EHS25_010103	Acetokinase family	-1.17264	0.00740266
1926	Xyl_70_120	GO:0009150	EHS25_009499	2-oxoacid dehydrogenases acyltransferase (catalytic domain)	1.02759	0.000273684
1927		purine ribonucleotide metabolic process	EHS25_003141	Accessory subunit of the mitochondrial membrane respiratory chain NADH dehydrogenase (Complex I), that is believed not to be involved in catalysis. Complex I functions in the transfer of electrons from NADH to the respiratory chain. The immediate electron acceptor for the enzyme is believed to be ubiquinone	1.04698	0.00157723
1928			EHS25_010103	Acetokinase family	1.15758	0.00550417
1929			EHS25_007658	Acyl-CoA dehydrogenase, N-terminal domain	0.662707	0.0208968
1930			EHS25_005392	Adenylate kinase, active site lid	0.859119	0.00363884
1931			EHS25_008599	ATP citrate lyase citrate-binding	0.973334	0.00872492
1932			EHS25_006279	ATP synthase	1.80595	2.42747e-05
1933			EHS25_001682	ATP synthase complex subunit h	2.45677	3.35962e-05
1934			EHS25_000717	ATP synthase, Delta/Epsilon chain, beta-sandwich domain	1.98349	0.000356105
1935			EHS25_006532	Belongs to the eukaryotic ribosomal protein eS1 family	0.747783	0.0114392
1936			EHS25_006628	Belongs to the GPI family	1.37158	0.00311389
1937			EHS25_004350	cAMP-dependent protein kinase	0.852209	0.0107801
1938			EHS25_006872	Catalyzes the oxidative decarboxylation of 6- phosphogluconate to ribulose 5-phosphate and CO(2), with concomitant reduction of NADP to NADPH	1.45864	2.06653e-05
1939			EHS25_001157	Catalyzes the reversible transfer of the terminal phosphate group between ATP and AMP. Plays an important role in cellular energy homeostasis and in adenine nucleotide metabolism. Adenylate kinase activity is critical for regulation of the phosphate utilization and the AMP de novo biosynthesis pathways	2.26177	1.36256e-06
1940			EHS25_009438	CybS, succinate dehydrogenase cytochrome B small subunit	1.24083	0.00107987
1941			EHS25_002568	Cytochrome c oxidase polypeptide iv, mitochondrial	2.50626	6.20772e-07
1942			EHS25_000241	Cytochrome C1 family	0.928714	0.00522283
1943			EHS25_000712	Fructose-bisphosphate aldolase class-II	0.938782	0.0161321
1944			EHS25_005127	Fructose-bisphosphate aldolase class-II	0.66584	0.0498197
1945			EHS25_006841	Metalloenzyme superfamily	1.00056	0.00900483
1946			EHS25_008150	Mitochondrial ATP synthase g subunit	1.50351	4.00734e-08
1947			EHS25_006571	Mitochondrial membrane ATP synthase (F(1)F(0) ATP synthase or Complex V) produces ATP from ADP in the presence of a proton gradient across the membrane which is generated by electron transport complexes of the respiratory chain. F-type ATPases consist of two structural domains, F(1) - containing the extramembraneous catalytic core, and F(0) - containing the membrane proton channel, linked togethe…	1.70138	0.000160572
1948			EHS25_008524	NDK	2.63368	2.44036e-05
1949			EHS25_006229	Phosphoglycerate kinase	0.88645	0.0021271
1950			EHS25_005967	Plays an important role in the de novo pathway and in the salvage pathway of purine nucleotide biosynthesis. Catalyzes the first	0.74197	0.0258506
1951			EHS25_000326	Produces ATP from ADP in the presence of a proton gradient across the membrane	2.61449	2.36505e-13
1952			EHS25_000339	Produces ATP from ADP in the presence of a proton gradient across the membrane	0.805157	0.00695239
1953			EHS25_005993	pyruvate dehydrogenase protein x component, mitochondrial	1.54495	0.000428606
1954			EHS25_003410	Ribose/Galactose Isomerase	2.24575	0.0125871
1955			EHS25_003814	RING-like zinc finger	2.09506	6.46292e-05
1956			EHS25_006046	Succinyl-CoA synthetase functions in the citric acid cycle (TCA), coupling the hydrolysis of succinyl-CoA to the synthesis of ATP and thus represents the only step of substrate- level phosphorylation in the TCA. The beta subunit provides nucleotide specificity of the enzyme and binds the substrate succinate, while the binding sites for coenzyme A and phosphate are found in the alpha subunit	0.841173	0.0165022
1957			EHS25_010206	The coatomer is a cytosolic protein complex that binds to dilysine motifs and reversibly associates with Golgi non- clathrin-coated vesicles, which further mediate biosynthetic protein transport from the ER, via the Golgi up to the trans Golgi network. Coatomer complex is required for budding from Golgi membranes, and is essential for the retrograde Golgi-to-ER transport of dilysine-tagged protei…	0.758811	7.50843e-06
1958			EHS25_001376	The pyruvate dehydrogenase complex catalyzes the overall conversion of pyruvate to acetyl-CoA and CO(2)	0.682405	0.0329293
1959			EHS25_002294	The pyruvate dehydrogenase complex catalyzes the overall conversion of pyruvate to acetyl-CoA and CO(2)	1.51891	0.00201049
1960			EHS25_007554	Thiamine pyrophosphate enzyme, N-terminal TPP binding domain	0.84873	0.0256323
1961			EHS25_006372	This enzyme condenses acetyl-CoA with acetoacetyl-CoA to form HMG-CoA, which is the substrate for HMG-CoA reductase	0.940016	0.00728008
1962			EHS25_007487	Transketolase, pyrimidine binding domain	2.05897	3.54527e-12
1963			EHS25_000456	Ubiquinol-cytochrome C reductase hinge protein	1.60526	0.000642016
1964			EHS25_008415	Zinc-finger domain	0.997966	0.000497758
1965		GO:0005737	EHS25_006384	2OG-Fe(II) oxygenase superfamily	1.4259	3.06953e-05
1966		cytoplasm	EHS25_009499	2-oxoacid dehydrogenases acyltransferase (catalytic domain)	1.02759	0.000273684
1967			EHS25_006078	3' exoribonuclease family, domain 1	1.04338	0.0022632
1968			EHS25_008650	60s ribosomal protein l37, mitochondrial	1.3718	0.0217718
1969			EHS25_008731	60S ribosomal protein L4 C-terminal domain	1.94403	5.48983e-05
1970			EHS25_002698	ABC transporter transmembrane region	0.615301	0.0122017
1971			EHS25_003141	Accessory subunit of the mitochondrial membrane respiratory chain NADH dehydrogenase (Complex I), that is believed not to be involved in catalysis. Complex I functions in the transfer of electrons from NADH to the respiratory chain. The immediate electron acceptor for the enzyme is believed to be ubiquinone	1.04698	0.00157723
1972			EHS25_010103	Acetokinase family	1.15758	0.00550417
1973			EHS25_000464	Acetyltransferase (GNAT) domain	1.16401	9.00636e-07
1974			EHS25_010108	ACT domain	1.05189	0.000728251
1975			EHS25_005226	Actin	0.673473	2.25295e-05
1976			EHS25_009141	Actin	1.02682	7.17469e-06
1977			EHS25_008200	Actin depolymerisation factor/cofilin -like domains	0.673375	0.00360845
1978			EHS25_010102	Acyl-CoA dehydrogenase, C-terminal domain	1.56338	0.00063753
1979			EHS25_005392	Adenylate kinase, active site lid	0.859119	0.00363884
1980			EHS25_002733	AhpC/TSA family	0.688189	0.0160907
1981			EHS25_002382	Alanine dehydrogenase/PNT, C-terminal domain	1.05591	0.00063483
1982			EHS25_006131	Alcohol dehydrogenase GroES-like domain	1.46511	0.00987026
1983			EHS25_004939	Alpha mannosidase, middle domain	0.740958	0.00118977
1984			EHS25_008980	Alpha/beta hydrolase family	0.685279	0.0078151
1985			EHS25_002038	Aminomethyltransferase folate-binding domain-containing protein	0.70699	0.00508193
1986			EHS25_002662	Aminotransferase class-V	1.1815	0.00137067
1987			EHS25_001581	and, together with other initiation factors, stimulates binding of mRNA and methionyl-tRNAi to the 40S ribosome	1.82128	6.89629e-08
1988			EHS25_003771	Arginase family	1.06858	8.83992e-05
1989			EHS25_001268	assists the folding of proteins upon ATP hydrolysis	1.46688	0.00252094
1990			EHS25_003182	assists the folding of proteins upon ATP hydrolysis	0.685904	0.0197493
1991			EHS25_004463	assists the folding of proteins upon ATP hydrolysis	0.833991	3.06953e-05
1992			EHS25_008599	ATP citrate lyase citrate-binding	0.973334	0.00872492
1993			EHS25_006279	ATP synthase	1.80595	2.42747e-05
1994			EHS25_001682	ATP synthase complex subunit h	2.45677	3.35962e-05
1995			EHS25_000717	ATP synthase, Delta/Epsilon chain, beta-sandwich domain	1.98349	0.000356105
1996			EHS25_006534	BAR	0.960455	0.00831222
1997			EHS25_003165	BAR domain	0.595843	1.40234e-05
1998			EHS25_010157	B-cell receptor-associated protein 31-like	0.779372	0.00170608
[truncated: 486 more rows]
