# Supplementary material for: Global Transcriptome Profile of the Oleaginous Yeast Saitozyma podzolica DSM 27192 Cultivated in Glucose and Xylose
Source: J Fungi (Basel). 2021 Sep 15;7(9):758. doi: 10.3390/jof7090758 (PMC8466774; doi:10.3390/jof7090758)
Supplement: Supplementary file 1 [file jof-07-00758-s001.zip › Table S3.xlsx]

## Sheet: Sheet1
Table S3. GO functional enrichment of expressed gene clusters in Saitozyma podzolica DSM 27192 grown on glucose and xylose
	Cluster 1			Cluster 2				Cluster 3		Cluster 4				Cluster 5			Cluster 6
	nuclear lumen	ribosome biogenesis	RNA metabolic process	cytoplasm	peptide biosynthetic process	endoplasmic reticulum	structural constituent of ribosome	regulation of nucleic acid-templated transcription	DNA binding	cytoplasmic part	transport	organelle subcompartment	mannosyltransferase activity	cytoplasm	proteasome complex	ribose phosphate metabolic process	hydrolase activity, hydrolyzing O-glycosyl compounds	polysaccharide catabolic process
GeneID	GO:0031981	GO:0042254	GO:0016070	GO:0005737	GO:0043043	GO:0005783	GO:0003735	GO:1903506	GO:0003677	GO:0044444	GO:0006810	GO:0031984	GO:0000030	GO:0005737	GO:0000502	GO:0019693	GO:0004553	GO:0000272	Description_EGGNOG	GO	Description
EHS25_000002	0	0	0	0	0	0	0	0	0	0	1	0	0	0	0	0	0	0	Sugar (and other) transporter	GO:0022857	transmembrane transporter activity
EHS25_000005	0	0	0	0	0	0	0	0	0	0	1	0	0	0	0	0	0	0	Belongs to the major facilitator superfamily. Sugar transporter (TC 2.A.1.1) family	GO:0022857	transmembrane transporter activity
EHS25_000018	0	0	0	0	0	0	0	0	0	0	0	0	0	0	0	0	1	1	O-Glycosyl hydrolase family 30	GO:0030248	cellulose binding
EHS25_000025	0	0	0	0	0	0	0	0	0	1	1	0	0	0	0	0	0	0	Vacuolar effluxer which mediate the efflux of amino acids resulting from autophagic degradation. The release of autophagic amino acids allows the maintenance of protein synthesis and viability during nitrogen starvation	GO:0016021	integral component of membrane
EHS25_000041	0	0	0	0	0	0	0	0	0	0	0	0	0	1	0	0	0	0	Catalytic subunit of the peripheral V1 complex of vacuolar ATPase (V-ATPase). V-ATPase is responsible for acidifying a variety of intracellular compartments in eukaryotic cells	GO:0009678	pyrophosphate hydrolysis-driven proton transmembrane transporter activity
EHS25_000051	0	0	0	0	0	0	0	1	1	0	0	0	0	0	0	0	0	0	to TIGR gene model, INSD accession	GO:0003677	DNA binding
EHS25_000058	0	0	0	0	0	0	0	0	0	0	0	0	0	0	0	0	1	1	glucose import	GO:0008422	beta-glucosidase activity
EHS25_000072	0	0	0	0	0	0	0	0	0	1	0	0	0	0	0	0	0	0	Belongs to the eukaryotic ribosomal protein P1 P2 family	GO:0043021	ribonucleoprotein complex binding
EHS25_000075	0	0	0	0	0	0	0	0	0	0	0	0	0	1	1	0	0	0	Proteasome subunit	GO:0030170	pyridoxal phosphate binding
EHS25_000084	0	0	0	0	0	0	0	0	0	0	1	0	0	0	0	0	0	0	OPT oligopeptide transporter protein	GO:0016021	integral component of membrane
EHS25_000085	0	0	0	0	0	0	0	0	0	1	0	1	0	0	0	0	0	0	Phosphatidylinositol-glycan biosynthesis class S protein	GO:0042765	GPI-anchor transamidase complex
EHS25_000090	0	0	0	2	0	0	1	0	0	0	0	0	0	0	0	0	0	0	Ribosomal protein L35Ae	GO:0003735	structural constituent of ribosome
EHS25_000093	0	0	0	0	0	0	0	0	0	0	0	0	0	0	0	0	1	0	Galactose mutarotase-like	GO:0004553	hydrolase activity, hydrolyzing O-glycosyl compounds
EHS25_000103	0	0	0	1	0	0	0	0	0	0	0	0	0	0	0	0	0	0	SNARE associated Golgi protein	GO:0031228	intrinsic component of Golgi membrane
EHS25_000113	1	0	1	0	0	0	0	0	0	0	0	0	0	0	0	0	0	0	Vitamin-D-receptor interacting Mediator subunit 4	GO:0003712	transcription coregulator activity
EHS25_000123	0	0	0	0	0	0	0	0	0	0	0	0	0	1	0	0	0	0	Transporter	GO:0015297	antiporter activity
EHS25_000133	0	0	0	0	0	0	0	0	0	0	0	0	0	1	0	0	0	0	RAI1 like PD-(D/E)XK nuclease	GO:0000166	nucleotide binding
EHS25_000135	0	0	0	0	0	0	0	0	0	0	0	0	0	1	0	0	0	0	Functions as component of the Arp2 3 complex which is involved in regulation of actin polymerization and together with an activating nucleation-promoting factor (NPF) mediates the formation of branched actin networks	GO:0044877	protein-containing complex binding
EHS25_000136	0	0	0	0	0	0	0	0	0	1	0	1	1	0	0	0	0	0	Alg9-like mannosyltransferase family	GO:0016491	oxidoreductase activity
EHS25_000138	0	0	0	1	0	0	0	0	0	0	0	0	0	0	0	0	0	0	Domain present in VPS-27, Hrs and STAM	GO:0016740	transferase activity
EHS25_000150	1	1	1	0	0	0	0	0	0	0	0	0	0	0	0	0	0	0	Brix	GO:0008312	7S RNA binding
EHS25_000157	1	0	1	0	0	0	0	0	0	0	0	0	0	0	0	0	0	0	CDK-activating kinase assembly factor MAT1	GO:0005524	ATP binding
EHS25_000159	0	0	0	0	0	0	0	0	0	1	0	1	0	0	0	0	0	0	Membrane bound O-acyl transferase family	GO:0008374	O-acyltransferase activity
EHS25_000166	0	0	0	0	0	0	0	0	0	0	0	0	0	1	1	0	0	0	Proteasome subunit beta type	GO:0004298	threonine-type endopeptidase activity
EHS25_000172	0	0	1	0	0	0	0	0	0	0	0	0	0	0	0	0	0	0	Fungal specific transcription factor domain	GO:0003677	DNA binding
EHS25_000181	0	0	0	0	0	0	0	1	1	0	0	0	0	0	0	0	0	0	zinc finger	GO:0000978	RNA polymerase II cis-regulatory region sequence-specific DNA binding
EHS25_000184	0	0	0	0	0	0	0	0	0	0	1	0	0	0	0	0	0	0	Dynein light chain type 1	GO:0016887	ATPase activity
EHS25_000208	0	0	0	0	1	0	0	0	0	0	0	0	0	0	0	0	0	0	Belongs to the small Tim family	GO:0046872	metal ion binding
EHS25_000218	0	0	0	0	0	0	0	0	0	1	0	1	1	0	0	0	0	0	Glycosyltransferase sugar-binding region containing DXD motif	GO:0000009	alpha-1,6-mannosyltransferase activity
EHS25_000231	0	0	0	0	0	0	0	0	0	0	0	0	0	1	0	0	0	0	Cyclin, N-terminal domain	GO:0003682	chromatin binding
EHS25_000241	0	0	0	0	0	0	0	0	0	0	0	0	0	1	0	1	0	0	Cytochrome C1 family	GO:0046872	metal ion binding
EHS25_000245	0	0	0	1	0	0	0	0	0	0	0	0	0	0	0	0	0	0	Links covalently the heme group to the apoprotein of cytochrome c	GO:0005524	ATP binding
EHS25_000248	0	0	0	0	0	0	0	0	0	0	0	0	0	1	0	0	0	0	GGL domain	GO:0031681	G-protein beta-subunit binding
EHS25_000257	0	0	0	0	0	0	0	0	0	0	0	0	1	0	0	0	0	0	Belongs to the pyrroline-5-carboxylate reductase family	GO:0000030	mannosyltransferase activity
EHS25_000261	0	0	0	0	0	0	0	0	0	0	0	0	0	1	0	0	0	0	Belongs to the STXBP unc-18 SEC1 family	GO:0019905	syntaxin binding
EHS25_000276	0	0	0	0	0	0	0	0	0	0	0	0	0	1	0	0	0	0	Belongs to the class-I aminoacyl-tRNA synthetase family	GO:0009881	photoreceptor activity
EHS25_000280	0	0	0	0	1	0	0	0	0	0	0	0	0	0	0	0	0	0	Vacuolar effluxer which mediate the efflux of amino acids resulting from autophagic degradation. The release of autophagic amino acids allows the maintenance of protein synthesis and viability during nitrogen starvation	GO:0031301	integral component of organelle membrane
EHS25_000283	0	0	0	0	0	0	0	0	0	0	0	0	0	1	0	0	0	0	Roadblock/LC7 domain	GO:0003774	motor activity
EHS25_000285	0	0	1	0	0	0	0	0	0	0	0	0	0	0	0	0	0	0	D-isomer specific 2-hydroxyacid dehydrogenase, catalytic domain	GO:0004648	O-phospho-L-serine:2-oxoglutarate aminotransferase activity
EHS25_000292	0	0	0	0	0	0	0	0	1	0	0	0	0	0	0	0	0	0	Timeless protein	GO:0003677	DNA binding
EHS25_000320	0	0	0	2	0	0	1	0	0	0	0	0	0	0	0	0	0	0	Belongs to the universal ribosomal protein uS11 family	GO:0070181	small ribosomal subunit rRNA binding
EHS25_000325	0	0	0	0	0	0	0	0	0	0	1	0	0	0	0	0	0	0	to TIGR gene model, INSD accession AAW41474.1	GO:0022857	transmembrane transporter activity
EHS25_000326	0	0	0	0	0	0	0	0	0	0	0	0	0	1	0	1	0	0	Produces ATP from ADP in the presence of a proton gradient across the membrane	GO:0016757	transferase activity, transferring glycosyl groups
EHS25_000332	0	0	0	0	1	0	0	0	0	0	0	0	0	0	0	0	0	0	Belongs to the adaptor complexes small subunit family	GO:0016491	oxidoreductase activity
EHS25_000337	0	0	0	0	0	0	0	0	0	0	0	0	0	0	0	0	1	0	Belongs to the glycosyl hydrolase 5 (cellulase A) family	GO:0004553	hydrolase activity, hydrolyzing O-glycosyl compounds
EHS25_000338	0	0	1	0	0	0	0	0	0	0	0	0	0	0	0	0	0	0	alpha-L-rhamnosidase activity	GO:0030596	alpha-L-rhamnosidase activity
EHS25_000345	0	0	0	0	0	0	0	0	0	0	0	0	0	1	0	0	0	0	late endosome to vacuole transport-related protein	GO:0010008	endosome membrane
EHS25_000361	0	0	0	1	0	0	0	0	0	0	0	0	0	0	0	0	0	0	Ketol-acid reductoisomerase	GO:0003700	DNA-binding transcription factor activity
EHS25_000362	0	0	0	1	0	0	0	0	0	0	0	0	0	0	0	0	0	0	Catalyzes the formation of 6,7-dimethyl-8- ribityllumazine by condensation of 5-amino-6-(D- ribitylamino)uracil with 3,4-dihydroxy-2-butanone 4-phosphate. This is the penultimate step in the biosynthesis of riboflavin	GO:0005525	GTP binding
EHS25_000367	0	0	0	0	0	0	0	0	0	1	1	1	0	0	0	0	0	0	PhoX homologous domain, present in p47phox and p40phox.	GO:0016810	hydrolase activity, acting on carbon-nitrogen (but not peptide) bonds
EHS25_000371	0	0	0	0	0	0	0	0	0	0	0	0	0	1	0	0	0	0	Cell wall organization and biogenesis-related protein	GO:0008092	cytoskeletal protein binding
EHS25_000400	0	0	0	0	0	0	0	0	0	0	0	0	0	1	0	0	0	0	Rho GTPase activator	GO:0046872	metal ion binding
EHS25_000405	0	0	0	0	0	0	0	1	0	0	0	0	0	0	0	0	0	0	Mediator complex subunit Med5	GO:0003712	transcription coregulator activity
EHS25_000406	0	0	0	0	0	0	0	0	0	0	0	0	0	1	0	0	0	0	Oligosaccharyltransferase subunit 5	GO:0016021	integral component of membrane
EHS25_000408	0	0	0	0	0	0	0	1	1	0	0	0	0	0	0	0	0	0	Belongs to the histone deacetylase family. HD Type 1 subfamily	GO:0008137	NADH dehydrogenase (ubiquinone) activity
EHS25_000411	0	0	0	2	0	1	0	0	0	0	0	0	0	0	0	0	0	0	PAP2 superfamily	GO:0003743	translation initiation factor activity
EHS25_000419	0	0	0	0	0	0	0	0	1	0	0	0	0	0	0	0	0	0	Acetyltransferase (GNAT) domain	GO:0003677	DNA binding
EHS25_000451	0	0	1	0	0	0	0	0	0	0	0	0	0	0	0	0	0	0	RNA recognition motif	GO:0003723	RNA binding
EHS25_000456	0	0	0	0	0	0	0	0	0	0	0	0	0	1	0	1	0	0	Ubiquinol-cytochrome C reductase hinge protein	GO:0008121	ubiquinol-cytochrome-c reductase activity
EHS25_000462	1	0	1	0	0	0	0	0	0	0	0	0	0	0	0	0	0	0	Belongs to the transthyretin family. 5-hydroxyisourate hydrolase subfamily	GO:0005524	ATP binding
EHS25_000464	0	0	0	0	0	0	0	0	0	1	0	0	0	0	0	0	0	0	Acetyltransferase (GNAT) domain	GO:0048029	monosaccharide binding
EHS25_000468	0	0	1	0	0	0	0	0	0	0	0	0	0	0	0	0	0	0	Belongs to the phosphatase 2A regulatory subunit B family	GO:0004722	protein serine/threonine phosphatase activity
EHS25_000469	0	0	1	0	0	0	0	0	0	0	0	0	0	0	0	0	0	0	Protein tyrosine kinase	GO:0000287	magnesium ion binding
EHS25_000473	1	1	1	0	0	0	0	0	0	0	0	0	0	0	0	0	0	0	S-adenosyl-L-methionine-dependent methyltransferase that specifically methylates the N(1) position of an adenine present in helix 65 in 25S rRNA	GO:0016788	hydrolase activity, acting on ester bonds
EHS25_000484	0	0	0	0	0	0	0	0	0	0	0	0	0	1	0	0	0	0	DASH complex subunit Ask1	GO:0044732	mitotic spindle pole body
EHS25_000499	0	0	0	2	0	0	1	0	0	0	0	0	0	0	0	0	0	0	DNA polymerase alpha/epsilon subunit B	GO:0003735	structural constituent of ribosome
EHS25_000506	0	0	0	0	0	0	0	0	0	1	0	0	0	0	0	0	0	0	Malic enzyme, NAD binding domain	GO:0008948	oxaloacetate decarboxylase activity
EHS25_000507	0	0	1	0	0	0	0	0	0	0	0	0	0	0	0	0	0	0	DNA-dependent RNA polymerase catalyzes the transcription of DNA into RNA using the four ribonucleoside triphosphates as substrates	GO:0004503	monophenol monooxygenase activity
EHS25_000514	0	0	0	1	1	0	0	0	0	0	0	0	0	0	0	0	0	0	Belongs to the peptidase S10 family	GO:0003723	RNA binding
EHS25_000515	0	0	1	0	0	0	0	0	0	0	0	0	0	0	0	0	0	0	RNA polymerase Rpc34 subunit	GO:0005524	ATP binding
EHS25_000532	0	0	0	0	0	0	0	0	0	0	0	0	0	1	0	0	0	0	Biotin and Thiamin Synthesis associated domain	GO:0008168	methyltransferase activity
EHS25_000556	0	0	0	0	0	0	0	0	0	1	0	1	0	0	0	0	0	0	1,3-beta-glucan synthase subunit FKS1	GO:0005524	ATP binding
EHS25_000594	0	0	0	0	0	0	0	1	1	0	0	0	0	0	0	0	0	0	GAL4-like Zn(II)2Cys6 (or C6 zinc) binuclear cluster DNA-binding domain	GO:0003677	DNA binding
EHS25_000597	0	0	0	0	0	0	0	0	0	0	0	0	0	1	0	0	0	0	Removes 5-oxoproline from various penultimate amino acid residues except L-proline	GO:0016920	pyroglutamyl-peptidase activity
EHS25_000622	0	0	0	0	0	0	0	1	1	0	0	0	0	0	0	0	0	0	Fungal specific transcription factor domain	GO:0003677	DNA binding
EHS25_000627	0	0	0	0	0	0	0	0	0	0	0	0	0	0	0	0	1	1	Alpha-L-arabinofuranosidase C-terminus	GO:0046556	alpha-L-arabinofuranosidase activity
EHS25_000631	0	0	0	0	0	0	0	0	1	0	0	0	0	0	0	0	0	0	Fungal specific transcription factor domain	GO:0003677	DNA binding
EHS25_000686	0	0	0	0	0	0	0	1	1	0	0	0	0	0	0	0	0	0	Transcriptional regulator, MarR family with acetyltransferase activity	GO:0003677	DNA binding
EHS25_000689	0	1	1	0	0	0	0	0	0	0	0	0	0	0	0	0	0	0	metal ion binding	GO:0046872	metal ion binding
EHS25_000699	0	0	0	0	0	0	0	0	0	0	0	0	0	1	0	0	0	0	Autophagy-related protein 2 CAD motif	GO:0008081	phosphoric diester hydrolase activity
EHS25_000700	0	0	0	0	0	0	0	1	0	0	0	0	0	0	0	0	0	0	Serine/Threonine protein kinases, catalytic domain	GO:0004713	protein tyrosine kinase activity
EHS25_000701	0	0	0	0	0	0	0	0	0	1	0	0	0	0	0	0	0	0	PET assembly of cytochrome c oxidase, mitochondrial	GO:0005739	mitochondrion
EHS25_000717	0	0	0	0	0	0	0	0	0	0	0	0	0	1	0	1	0	0	ATP synthase, Delta/Epsilon chain, beta-sandwich domain	GO:0004357	glutamate-cysteine ligase activity
EHS25_000731	0	0	0	0	0	0	0	1	1	0	0	0	0	0	0	0	0	0	complex subunit rsc9	GO:0003677	DNA binding
EHS25_000732	1	0	0	0	0	0	0	0	0	0	0	0	0	0	0	0	0	0	BING4CT (NUC141) domain	GO:0005730	nucleolus
EHS25_000748	0	0	0	0	0	0	0	0	1	0	0	0	0	0	0	0	0	0	gamma DNA-directed DNA polymerase	GO:0016491	oxidoreductase activity
EHS25_000751	0	0	1	0	0	0	0	0	0	0	0	0	0	0	0	0	0	0	Catalyzes the formation of N(7)-methylguanine at position 46 (m7G46) in tRNA	GO:0035091	phosphatidylinositol binding
EHS25_000758	0	0	0	1	0	0	0	0	0	0	0	0	0	0	0	0	0	0	Belongs to the uroporphyrinogen decarboxylase family	GO:0004853	uroporphyrinogen decarboxylase activity
EHS25_000766	0	0	0	0	0	0	0	0	0	0	0	0	0	1	0	0	0	0	Hydrolyzes a variety of simple alpha-D-galactoside as well as more complex molecules such as oligosaccharides and polysaccharides	GO:0003677	DNA binding
EHS25_000768	0	0	0	0	0	0	0	0	0	1	0	0	0	0	0	0	0	0	Mitochondrial ribosomal protein L27	GO:0003735	structural constituent of ribosome
EHS25_000769	0	0	0	0	0	0	0	0	0	0	0	0	0	1	0	0	0	0	Gelsolin repeat	GO:0005096	GTPase activator activity
EHS25_000776	0	0	0	0	0	0	0	0	0	0	0	0	0	1	0	0	0	0	Caspase domain	GO:0004175	endopeptidase activity
EHS25_000800	0	0	0	0	1	1	0	0	0	0	0	0	0	0	0	0	0	0	Oligosaccharyltransferase subunit Ribophorin II	GO:0016740	transferase activity
EHS25_000811	0	0	0	0	0	0	0	0	0	0	1	0	0	0	0	0	0	0	Sugar (and other) transporter	GO:0022857	transmembrane transporter activity
EHS25_000817	0	0	0	0	0	0	0	0	0	0	1	0	0	0	0	0	0	0	Glyceraldehyde 3-phosphate dehydrogenase, NAD binding domain	GO:0051287	NAD binding
EHS25_000856	0	0	0	0	0	0	0	1	1	0	0	0	0	0	0	0	0	0	GAL4-like Zn(II)2Cys6 (or C6 zinc) binuclear cluster DNA-binding domain	GO:0003677	DNA binding
EHS25_000861	0	0	1	0	0	0	0	0	0	0	0	0	0	0	0	0	0	0	Fungal specific transcription factor domain	GO:0003677	DNA binding
EHS25_000877	0	0	0	0	0	0	0	1	1	0	0	0	0	0	0	0	0	0	His Kinase A (phosphoacceptor) domain	GO:0003700	DNA-binding transcription factor activity
EHS25_000909	0	0	0	0	0	0	0	1	1	0	0	0	0	0	0	0	0	0	GAL4-like Zn(II)2Cys6 (or C6 zinc) binuclear cluster DNA-binding domain	GO:0003677	DNA binding
EHS25_000976	0	0	1	0	0	0	0	0	0	0	0	0	0	0	0	0	0	0	Taurine catabolism dioxygenase TauD, TfdA family	GO:0016491	oxidoreductase activity
EHS25_000981	0	0	0	0	0	0	0	0	0	0	1	0	0	0	0	0	0	0	Major Facilitator Superfamily	GO:0022857	transmembrane transporter activity
EHS25_000985	0	0	0	0	1	0	0	0	0	0	0	0	0	0	0	0	0	0	DnaJ molecular chaperone homology domain	GO:0051082	unfolded protein binding
EHS25_000987	0	0	0	0	0	0	0	0	0	0	0	0	0	1	0	0	0	0	ALG6, ALG8 glycosyltransferase family	GO:0003735	structural constituent of ribosome
EHS25_000995	0	0	0	2	0	0	1	0	0	0	0	0	0	0	0	0	0	0	Belongs to the universal ribosomal protein uL23 family	GO:0003735	structural constituent of ribosome
EHS25_001004	0	0	0	0	0	0	0	0	0	0	0	0	0	1	0	1	0	0	Catalyzes the ATP-dependent amination of UTP to CTP with either L-glutamine or ammonia as the source of nitrogen	GO:0016787	hydrolase activity
EHS25_001006	0	0	0	0	0	0	0	0	0	0	0	0	0	0	0	1	0	0	Shikimate kinase	GO:0016787	hydrolase activity
EHS25_001016	0	0	0	0	0	0	0	0	0	1	0	1	0	0	0	0	0	0	chitin synthase	GO:0004553	hydrolase activity, hydrolyzing O-glycosyl compounds
EHS25_001027	0	0	0	0	0	0	0	0	0	1	1	1	0	0	0	0	0	0	GNS1/SUR4 family	GO:0005509	calcium ion binding
EHS25_001035	0	0	0	0	0	0	0	0	0	0	0	0	0	0	0	0	1	0	Alpha-L-rhamnosidase	GO:0003677	DNA binding
EHS25_001043	0	0	0	0	0	0	0	0	0	0	1	0	0	0	0	0	0	0	Sugar (and other) transporter	GO:0022857	transmembrane transporter activity
EHS25_001058	0	0	0	0	0	0	0	0	0	1	0	1	1	0	0	0	0	0	Mannosyltransferase involved in glycosylphosphatidylinositol-anchor biosynthesis	GO:0004376	glycolipid mannosyltransferase activity
EHS25_001071	0	0	1	0	0	0	0	0	0	0	0	0	0	0	0	0	0	0	Extension to Ser/Thr-type protein kinases	GO:0003677	DNA binding
EHS25_001088	0	0	0	0	0	0	0	1	1	0	0	0	0	0	0	0	0	0	Kinase-like	GO:0046872	metal ion binding
EHS25_001120	0	0	0	2	0	0	1	0	0	0	0	0	0	0	0	0	0	0	Belongs to the universal ribosomal protein uL14 family	GO:0070180	large ribosomal subunit rRNA binding
EHS25_001137	0	0	0	0	0	0	0	0	1	0	0	0	0	0	0	0	0	0	Gti1/Pac2 family	GO:0003677	DNA binding
EHS25_001144	0	0	1	0	0	0	0	0	0	0	0	0	0	0	0	0	0	0	Phytochrome region	GO:0005524	ATP binding
EHS25_001154	0	0	0	0	0	0	0	0	0	1	1	0	0	0	0	0	0	0	Cytochrome c oxidase subunit IV	GO:0009055	electron transfer activity
EHS25_001157	0	0	0	1	0	0	0	0	0	0	0	0	0	0	0	0	0	0	Catalyzes the reversible transfer of the terminal phosphate group between ATP and AMP. Plays an important role in cellular energy homeostasis and in adenine nucleotide metabolism. Adenylate kinase activity is critical for regulation of the phosphate utilization and the AMP de novo biosynthesis pathways	GO:0005524	ATP binding
EHS25_001160	0	0	0	0	0	0	0	1	1	0	0	0	0	0	0	0	0	0	Fungal specific transcription factor domain	GO:0000981	DNA-binding transcription factor activity, RNA polymerase II-specific
EHS25_001175	0	0	0	0	0	0	0	0	0	0	0	0	0	1	1	0	0	0	Proteasome subunit	GO:0003676	nucleic acid binding
EHS25_001176	0	0	0	0	0	0	0	0	0	0	0	0	0	1	0	0	0	0	Glycolipid transfer protein (GLTP)	GO:0120013	lipid transfer activity
EHS25_001205	0	0	0	1	0	0	0	0	0	0	0	0	0	0	0	0	0	0	AP endonuclease family 2	GO:0003906	DNA-(apurinic or apyrimidinic site) endonuclease activity
EHS25_001228	0	0	0	0	0	0	0	0	1	0	0	0	0	0	0	0	0	0	general transcriptional repressor	GO:0000978	RNA polymerase II cis-regulatory region sequence-specific DNA binding
EHS25_001230	0	0	0	0	0	0	0	0	0	0	0	0	0	1	0	0	0	0	Cytoplasm protein	GO:0019901	protein kinase binding
EHS25_001241	1	0	1	0	0	0	0	0	0	0	0	0	0	0	0	0	0	0	Nucleotidyltransferase domain	GO:0046872	metal ion binding
EHS25_001248	0	0	0	0	0	0	0	0	1	0	0	0	0	0	0	0	0	0	DNA binding	GO:0003677	DNA binding
EHS25_001263	0	0	0	0	1	0	0	0	0	0	0	0	0	0	0	0	0	0	Component of the MICOS complex, a large protein complex of the mitochondrial inner membrane that plays crucial roles in the maintenance of crista junctions, inner membrane architecture, and formation of contact sites to the outer membrane	GO:0061617	MICOS complex
EHS25_001267	0	0	0	0	0	0	0	0	0	1	0	0	0	0	0	0	0	0	Belongs to the universal ribosomal protein uS19 family	GO:0003723	RNA binding
EHS25_001268	0	0	0	0	0	0	0	0	0	0	0	0	0	1	0	0	0	0	assists the folding of proteins upon ATP hydrolysis	GO:0016740	transferase activity
EHS25_001269	0	0	0	0	0	0	0	0	0	1	0	0	0	0	0	0	0	0	RAVE protein 1 C terminal	GO:0043291	RAVE complex
EHS25_001272	0	0	0	2	0	0	1	0	0	0	0	0	0	0	0	0	0	0	Belongs to the universal ribosomal protein uL3 family	GO:0046872	metal ion binding
EHS25_001273	0	0	0	0	0	0	0	1	0	0	0	0	0	0	0	0	0	0	Snf2-ATP coupling, chromatin remodelling complex	GO:0005524	ATP binding
EHS25_001280	0	0	0	0	0	0	0	0	0	0	0	0	0	1	0	0	0	0	Electron transfer flavoprotein domain	GO:0005524	ATP binding
EHS25_001284	0	0	0	1	1	0	0	0	0	0	0	0	0	0	0	0	0	0	DRG Family Regulatory Proteins, Tma46	GO:0046872	metal ion binding
EHS25_001309	0	0	0	0	0	0	0	0	0	0	0	0	0	0	1	0	0	0	Ankyrin repeat	GO:0000502	proteasome complex
EHS25_001319	0	0	0	0	0	0	0	0	0	0	1	0	0	0	0	0	0	0	Major Facilitator Superfamily	GO:0022857	transmembrane transporter activity
EHS25_001336	0	0	0	0	0	0	0	1	1	0	0	0	0	0	0	0	0	0	Fungal specific transcription factor domain	GO:0016787	hydrolase activity
EHS25_001377	0	0	0	0	0	0	0	1	1	0	0	0	0	0	0	0	0	0	Guanine deaminase	GO:0003677	DNA binding
EHS25_001383	0	1	0	0	0	0	0	0	0	0	0	0	0	0	0	0	0	0	CBF/Mak21 family	GO:0016020	membrane
EHS25_001393	0	0	0	0	0	0	0	1	1	0	0	0	0	0	0	0	0	0	HMG-box domain	GO:0003677	DNA binding
EHS25_001411	0	0	0	0	0	0	0	0	0	0	0	0	0	1	0	0	0	0	Clathrin-coated vesicle protein	GO:0016021	integral component of membrane
EHS25_001417	1	1	0	0	0	0	0	0	0	0	0	0	0	0	0	0	0	0	Involved in the biogenesis of the 60S ribosomal subunit	GO:0016787	hydrolase activity
EHS25_001421	0	0	0	1	0	1	0	0	0	0	0	0	0	0	0	0	0	0	Endoplasmic reticulum protein	GO:0072546	ER membrane protein complex
EHS25_001431	0	0	0	0	0	0	0	0	0	1	0	0	0	0	0	0	0	0	SHS2 domain found in N terminus of Rpb7p/Rpc25p/MJ0397	GO:0003968	RNA-directed 5'-3' RNA polymerase activity
EHS25_001443	0	0	0	0	0	0	0	0	0	0	0	0	0	1	0	0	0	0	Adenylate sensor of SNF1-like protein kinase	GO:0003677	DNA binding
EHS25_001445	0	0	0	0	0	0	0	0	0	0	1	0	0	0	0	0	0	0	Major Facilitator Superfamily	GO:0003677	DNA binding
EHS25_001450	0	0	0	0	0	0	0	0	0	0	0	0	0	1	0	0	0	0	Ring finger	GO:0008270	zinc ion binding
EHS25_001458	0	0	0	2	0	0	1	0	0	0	0	0	0	0	0	0	0	0	Ribosomal protein S12	GO:0019843	rRNA binding
EHS25_001469	0	0	0	1	1	0	0	0	0	0	0	0	0	0	0	0	0	0	Eukaryotic elongation factor 5A hypusine, DNA-binding OB fold	GO:0003677	DNA binding
EHS25_001473	0	0	0	0	0	0	0	0	0	0	0	0	0	1	0	0	0	0	The coatomer is a cytosolic protein complex that binds to dilysine motifs and reversibly associates with Golgi non- clathrin-coated vesicles, which further mediate biosynthetic protein transport from the ER, via the Golgi up to the trans Golgi network. Coatomer complex is required for budding from Golgi membranes, and is essential for the retrograde Golgi-to-ER transport of dilysine-tagged protei…	GO:0020037	heme binding
EHS25_001480	0	0	0	0	0	0	0	0	0	0	0	0	0	1	0	0	0	0	May act as a negative regulator of salt tolerance	GO:0008877	glucose-1-phosphatase activity
EHS25_001483	0	0	0	0	0	0	0	0	0	0	0	0	0	1	0	0	0	0	Phosphatidylserine decarboxylase	GO:0005509	calcium ion binding
EHS25_001489	0	0	0	0	0	0	0	0	0	0	0	0	0	1	0	1	0	0	Ribose 5-phosphate isomerase A (phosphoriboisomerase A)	GO:0003852	2-isopropylmalate synthase activity
EHS25_001492	0	0	0	1	0	0	0	0	0	0	0	0	0	0	0	0	0	0	Stereospecific condensation of phosphoenolpyruvate (PEP) and D-erythrose-4-phosphate (E4P) giving rise to 3-deoxy-D- arabino-heptulosonate-7-phosphate (DAHP)	GO:0003849	3-deoxy-7-phosphoheptulonate synthase activity
EHS25_001506	0	0	0	0	0	0	0	1	1	0	0	0	0	0	0	0	0	0	Fungal specific transcription factor domain	GO:0003677	DNA binding
EHS25_001511	0	0	0	0	0	0	0	0	0	0	0	0	0	1	0	0	0	0	Belongs to the TRAFAC class TrmE-Era-EngA-EngB-Septin- like GTPase superfamily. Septin GTPase family	GO:0016746	transferase activity, transferring acyl groups
EHS25_001515	0	0	0	0	0	0	0	0	0	0	0	0	0	1	0	0	0	0	Heat shock protein HSP60	GO:0016887	ATPase activity
EHS25_001534	0	0	0	0	0	0	0	0	0	0	0	0	0	1	0	0	0	0	Autophagy-related protein 11	GO:0060090	molecular adaptor activity
EHS25_001537	0	0	0	0	0	0	0	0	1	0	0	0	0	0	0	0	0	0	KilA-N	GO:0003677	DNA binding
EHS25_001539	0	0	0	0	0	0	0	0	0	0	0	0	0	1	0	0	0	0	Pantoate-beta-alanine ligase	GO:0016787	hydrolase activity
EHS25_001547	0	0	0	1	1	0	0	0	0	0	0	0	0	0	0	0	0	0	Belongs to the TRAFAC class myosin-kinesin ATPase superfamily. Myosin family	GO:0003743	translation initiation factor activity
EHS25_001555	0	0	0	0	0	0	0	1	1	0	0	0	0	0	0	0	0	0	STE like transcription factor	GO:0003677	DNA binding
EHS25_001564	0	0	0	0	0	0	0	0	0	1	0	0	0	0	0	0	0	0	motif in proteasome subunits, Int-6, Nip-1 and TRIP-15	GO:0005198	structural molecule activity
EHS25_001577	1	1	1	0	0	0	0	0	0	0	0	0	0	0	0	0	0	0	Ribosome biogenesis and assembly-related protein	GO:0005525	GTP binding
EHS25_001581	0	0	0	0	0	0	0	0	0	0	0	0	0	1	0	0	0	0	and, together with other initiation factors, stimulates binding of mRNA and methionyl-tRNAi to the 40S ribosome	GO:0003700	DNA-binding transcription factor activity
EHS25_001583	0	0	0	0	0	0	0	0	0	0	0	0	0	1	0	0	0	0	Electron transfer flavoprotein FAD-binding domain	GO:0009055	electron transfer activity
EHS25_001584	0	0	0	0	0	0	0	0	1	0	0	0	0	0	0	0	0	0	Serine/Threonine protein kinases, catalytic domain	GO:0003677	DNA binding
EHS25_001585	0	0	1	0	0	0	0	0	0	0	0	0	0	0	0	0	0	0	DNA-dependent RNA polymerase catalyzes the transcription of DNA into RNA using the four ribonucleoside triphosphates as substrates	GO:0016491	oxidoreductase activity
EHS25_001589	0	0	1	0	0	0	0	0	0	0	0	0	0	0	0	0	0	0	Fungal specific transcription factor domain	GO:0000981	DNA-binding transcription factor activity, RNA polymerase II-specific
EHS25_001590	0	0	0	0	0	0	0	0	0	0	0	0	0	0	0	0	1	0	Belongs to the glycosyl hydrolase 43 family	GO:0004553	hydrolase activity, hydrolyzing O-glycosyl compounds
EHS25_001596	0	0	0	0	0	0	0	1	1	0	0	0	0	0	0	0	0	0	Fungal specific transcription factor domain	GO:0003677	DNA binding
EHS25_001599	0	0	0	0	0	0	0	1	0	0	0	0	0	0	0	0	0	0	WD domain, G-beta repeat	GO:0000790	nuclear chromatin
EHS25_001609	0	0	0	2	0	1	1	0	0	0	0	0	0	0	0	0	0	0	MIR domain	GO:0005524	ATP binding
EHS25_001621	0	0	0	1	1	0	0	0	0	0	0	0	0	0	0	0	0	0	Initiation factor eIF2 gamma, C terminal	GO:0046872	metal ion binding
EHS25_001644	0	0	0	0	0	0	0	0	0	0	1	0	0	0	0	0	0	0	Major Facilitator Superfamily	GO:0022857	transmembrane transporter activity
EHS25_001649	0	0	0	1	0	1	0	0	0	0	0	0	0	0	0	0	0	0	ATP phosphoribosyltransferase	GO:0008324	cation transmembrane transporter activity
EHS25_001659	0	0	0	0	0	0	0	0	0	0	0	0	0	1	0	0	0	0	ribosomal protein import into nucleus	GO:0061608	nuclear import signal receptor activity
EHS25_001667	0	0	1	0	0	0	0	0	0	0	0	0	0	0	0	0	0	0	Catalyzes the hydroxylation of 2-polyprenyl-3-methyl-6- methoxy-1,4-benzoquinol (DMQH2) during ubiquinone biosynthesis. Has also a structural role in the COQ enzyme complex, stabilizing other COQ polypeptides	GO:0071949	FAD binding
EHS25_001676	0	0	0	1	0	1	0	0	0	0	0	0	0	0	0	0	0	0	This enzyme is required for electron transfer from NADP to cytochrome P450 in microsomes. It can also provide electron transfer to heme oxygenase and cytochrome B5. Involved in ergosterol biosynthesis	GO:0046872	metal ion binding
EHS25_001682	0	0	0	0	0	0	0	0	0	0	0	0	0	1	0	1	0	0	ATP synthase complex subunit h	GO:0000276	mitochondrial proton-transporting ATP synthase complex, coupling factor F(o)
EHS25_001795	0	0	0	0	0	0	0	1	0	0	0	0	0	0	0	0	0	0	basic region leucin zipper	GO:0003700	DNA-binding transcription factor activity
EHS25_001819	0	0	0	0	0	0	0	1	0	0	0	0	0	0	0	0	0	0	DNA-binding transcription factor activity	GO:0003700	DNA-binding transcription factor activity
EHS25_001853	0	0	0	0	0	0	0	0	1	0	0	0	0	0	0	0	0	0	Gti1/Pac2 family	GO:0003677	DNA binding
EHS25_001881	0	0	1	0	0	0	0	0	0	0	0	0	0	0	0	0	0	0	GAL4-like Zn(II)2Cys6 (or C6 zinc) binuclear cluster DNA-binding domain	GO:0003677	DNA binding
EHS25_001889	0	0	1	0	0	0	0	0	0	0	0	0	0	0	0	0	0	0	Serine/Threonine protein kinases, catalytic domain	GO:0015103	inorganic anion transmembrane transporter activity
EHS25_001982	0	0	0	0	0	0	0	0	0	0	0	0	0	1	0	0	0	0	Belongs to the 1-acyl-sn-glycerol-3-phosphate acyltransferase family	GO:0017176	phosphatidylinositol N-acetylglucosaminyltransferase activity
EHS25_001983	0	0	0	0	0	0	0	0	0	0	0	0	0	1	0	0	0	0	Adaptins are components of the adaptor complexes which link clathrin to receptors in coated vesicles. Clathrin-associated protein complexes are believed to interact with the cytoplasmic tails of membrane proteins, leading to their selection and concentration	GO:0030117	membrane coat
EHS25_001995	0	0	0	0	0	0	0	0	0	0	0	0	0	1	0	0	0	0	Signal-recognition-particle assembly has a crucial role in targeting secretory proteins to the rough endoplasmic reticulum membrane	GO:0008312	7S RNA binding
EHS25_001996	0	0	0	0	1	0	0	0	0	0	0	0	0	0	0	0	0	0	snRNP Sm proteins	GO:0003723	RNA binding
EHS25_002009	0	0	0	0	0	0	0	0	0	1	0	0	0	0	0	0	0	0	Ribosomal Proteins L2, C-terminal domain	GO:0004497	monooxygenase activity
EHS25_002012	0	0	0	2	0	0	1	0	0	0	0	0	0	0	0	0	0	0	Belongs to the eukaryotic ribosomal protein eS12 family	GO:0003677	DNA binding
EHS25_002020	0	0	0	0	0	0	0	0	0	0	0	0	0	1	0	0	0	0	Adenylate cyclase associated (CAP) C terminal	GO:0003747	translation release factor activity
EHS25_002038	0	0	0	0	0	0	0	0	0	0	0	0	0	1	0	0	0	0	Aminomethyltransferase folate-binding domain-containing protein	GO:0016740	transferase activity
EHS25_002039	0	1	1	0	0	0	0	0	0	0	0	0	0	0	0	0	0	0	monoubiquitination-related protein	GO:0043232	intracellular non-membrane-bounded organelle
EHS25_002056	0	0	0	0	0	0	0	0	0	1	1	1	0	0	0	0	0	0	Belongs to the DHHC palmitoyltransferase family	GO:0015095	magnesium ion transmembrane transporter activity
EHS25_002074	0	0	0	0	0	0	0	0	0	0	0	0	0	1	0	0	0	0	Protein tyrosine kinase	GO:0046872	metal ion binding
EHS25_002076	0	0	0	0	1	1	0	0	0	0	0	0	0	0	0	0	0	0	ICE2	GO:0031227	intrinsic component of endoplasmic reticulum membrane
EHS25_002092	0	0	0	0	0	0	0	0	1	0	0	0	0	0	0	0	0	0	helix loop helix domain	GO:0005524	ATP binding
EHS25_002117	0	0	0	0	0	0	0	0	0	0	0	0	0	1	1	0	0	0	PIN domain of ribonuclease	GO:0070181	small ribosomal subunit rRNA binding
EHS25_002118	0	0	0	0	0	0	0	0	0	0	0	0	0	1	1	0	0	0	Proteasome subunit A N-terminal signature Add an annotation	GO:0005515	protein binding
EHS25_002127	0	0	0	1	0	0	0	0	0	0	0	0	0	0	0	0	0	0	NADH dehydrogenase (ubiquinone) Fe-S protein 5	GO:0016491	oxidoreductase activity
EHS25_002142	0	0	0	1	0	0	0	0	0	0	0	0	0	0	0	0	0	0	Synaptobrevin	GO:0005484	SNAP receptor activity
EHS25_002274	0	0	0	0	0	0	0	1	1	0	0	0	0	0	0	0	0	0	Fungal specific transcription factor domain	GO:0003677	DNA binding
EHS25_002283	0	0	0	0	0	0	0	0	0	0	0	0	0	0	0	0	1	0	Belongs to the glycosyl hydrolase 43 family	GO:0046983	protein dimerization activity
EHS25_002286	0	0	0	0	0	0	0	0	0	0	0	0	0	1	0	0	0	0	to TIGR gene model	GO:0003735	structural constituent of ribosome
EHS25_002288	0	0	0	0	1	0	0	0	0	0	0	0	0	0	0	0	0	0	von Willebrand factor (vWF) type A domain	GO:0042030	ATPase inhibitor activity
EHS25_002294	0	0	0	0	0	0	0	0	0	0	0	0	0	1	0	1	0	0	The pyruvate dehydrogenase complex catalyzes the overall conversion of pyruvate to acetyl-CoA and CO(2)	GO:0003735	structural constituent of ribosome
EHS25_002309	0	0	0	0	0	0	0	0	0	0	0	0	0	0	0	0	0	1	Rhamnosidase B	GO:0003824	catalytic activity
EHS25_002313	0	0	0	1	1	0	1	0	0	0	0	0	0	0	0	0	0	0	P21-Rho-binding domain	GO:0003723	RNA binding
EHS25_002317	0	0	0	0	1	1	0	0	0	0	0	0	0	0	0	0	0	0	MIR domain	GO:0005524	ATP binding
EHS25_002322	0	0	0	0	0	0	0	1	1	0	0	0	0	0	0	0	0	0	DNA-binding domain	GO:0004333	fumarate hydratase activity
EHS25_002323	0	0	0	0	0	0	0	0	0	0	1	0	0	0	0	0	0	0	DUF1751-domain-containing protein	GO:0016021	integral component of membrane
EHS25_002326	0	0	0	0	0	0	0	0	0	0	1	0	0	0	0	0	0	0	FAD-binding domain	GO:0016491	oxidoreductase activity
EHS25_002351	0	0	0	0	0	0	0	0	0	0	0	0	0	1	0	0	0	0	Elongation factor G, domain IV	GO:0071949	FAD binding
EHS25_002355	0	0	0	0	0	0	0	0	0	0	0	0	0	1	0	0	0	0	ATPase family associated with various cellular activities (AAA)	GO:0008168	methyltransferase activity
EHS25_002357	0	0	0	0	0	0	0	0	0	0	0	0	0	1	1	0	0	0	Proteasome subunit	GO:0106073	dolichyl pyrophosphate Glc2Man9GlcNAc2 alpha-1,2-glucosyltransferase activity
EHS25_002369	0	0	0	0	1	1	0	0	0	0	0	0	0	0	0	0	0	0	PIGA (GPI anchor biosynthesis)	GO:0016746	transferase activity, transferring acyl groups
EHS25_002379	0	0	0	0	0	0	0	0	0	0	0	0	0	1	0	0	0	0	Transport protein Trs120 or TRAPPC9, TRAPP II complex subunit	GO:0005794	Golgi apparatus
EHS25_002382	0	0	0	0	0	0	0	0	0	0	0	0	0	1	0	0	0	0	Alanine dehydrogenase/PNT, C-terminal domain	GO:0003729	mRNA binding
EHS25_002384	0	0	0	0	0	0	0	0	0	1	0	1	0	0	0	0	0	0	galactosyltransferase activity	GO:0016757	transferase activity, transferring glycosyl groups
EHS25_002385	0	0	0	1	0	0	0	0	0	0	0	0	0	0	0	0	0	0	Tubulin binding cofactor A	GO:0003723	RNA binding
EHS25_002387	0	0	1	0	0	0	0	0	0	0	0	0	0	0	0	0	0	0	RNA pseudouridylate synthase	GO:0003723	RNA binding
EHS25_002397	0	0	0	0	0	0	0	0	0	0	0	0	0	1	0	1	0	0	diphosphomevalonate decarboxylase	GO:0003735	structural constituent of ribosome
EHS25_002401	0	0	0	0	0	0	0	1	0	0	0	0	0	0	0	0	0	0	motif in proteasome subunits, Int-6, Nip-1 and TRIP-15	GO:0003714	transcription corepressor activity
EHS25_002419	0	0	0	0	0	0	0	0	0	0	0	0	0	1	0	0	0	0	Protein tyrosine kinase	GO:0005524	ATP binding
EHS25_002424	0	0	0	0	0	0	0	0	0	0	1	0	0	0	0	0	0	0	Ssu72-like protein	GO:0005524	ATP binding
EHS25_002431	0	0	0	0	0	0	0	1	1	0	0	0	0	0	0	0	0	0	As part of the replication protein A (RPA RP-A), a single-stranded DNA-binding heterotrimeric complex, may play an essential role in DNA replication, recombination and repair. Binds and stabilizes single-stranded DNA intermediates, preventing complementary DNA reannealing and recruiting different proteins involved in DNA metabolism	GO:0003735	structural constituent of ribosome
EHS25_002440	0	0	0	0	0	0	0	0	0	0	0	0	0	1	0	0	0	0	KH domain	GO:0004190	aspartic-type endopeptidase activity
EHS25_002451	0	0	0	0	0	0	0	0	0	1	1	0	0	0	0	0	0	0	component of the eukaryotic translation initiation factor 3 (eIF-3) complex, which is involved in protein synthesis of a specialized repertoire of mRNAs and, together with other initiation factors, stimulates binding of mRNA and methionyl-tRNAi to the 40S ribosome. The eIF-3 complex specifically targets and initiates translation of a subset of mRNAs involved in cell proliferation	GO:0003743	translation initiation factor activity
EHS25_002466	0	0	0	0	1	0	1	0	0	0	0	0	0	0	0	0	0	0	Mitochondrial ribosomal protein S25	GO:0003735	structural constituent of ribosome
EHS25_002467	0	0	0	0	0	0	0	0	0	0	0	0	0	0	1	0	0	0	motif in proteasome subunits, Int-6, Nip-1 and TRIP-15	GO:0000502	proteasome complex
EHS25_002469	0	0	0	2	0	0	0	0	0	0	0	0	0	0	0	0	0	0	identical protein binding	GO:0042802	identical protein binding
EHS25_002479	0	0	0	0	0	0	0	0	1	0	0	0	0	0	0	0	0	0	Belongs to the aconitase IPM isomerase family	GO:0047780	citrate dehydratase activity
EHS25_002495	0	0	0	1	0	0	0	0	0	0	0	0	0	0	0	0	0	0	FGGY family of carbohydrate kinases, C-terminal domain	GO:0005509	calcium ion binding
EHS25_002497	0	0	0	0	0	0	0	0	0	0	0	0	0	1	0	0	0	0	Belongs to the peptidase M18 family	GO:0003677	DNA binding
EHS25_002498	0	0	0	1	1	0	1	0	0	0	0	0	0	0	0	0	0	0	Ribosomal S17	GO:0003676	nucleic acid binding
EHS25_002500	0	0	0	0	0	0	0	1	0	0	0	0	0	0	0	0	0	0	metal ion binding	GO:0046872	metal ion binding
EHS25_002506	0	0	0	2	0	0	1	0	0	0	0	0	0	0	0	0	0	0	Belongs to the universal ribosomal protein uS15 family	GO:0008270	zinc ion binding
EHS25_002507	0	0	0	2	0	0	1	0	0	0	0	0	0	0	0	0	0	0	Belongs to the eukaryotic ribosomal protein eS6 family	GO:0003676	nucleic acid binding
EHS25_002514	0	0	0	0	0	0	0	0	0	0	0	0	0	1	0	0	0	0	Leucine Rich repeat	GO:0005096	GTPase activator activity
EHS25_002517	0	0	1	0	0	0	0	0	0	0	0	0	0	0	0	0	0	0	PRP38 family	GO:0008446	GDP-mannose 4,6-dehydratase activity
EHS25_002518	1	0	1	0	0	0	0	0	0	0	0	0	0	0	0	0	0	0	Histone-like transcription factor (CBF/NF-Y) and archaeal histone	GO:0046982	protein heterodimerization activity
EHS25_002525	0	0	1	0	0	0	0	0	0	0	0	0	0	0	0	0	0	0	RNA polymerases D	GO:0046872	metal ion binding
EHS25_002530	0	0	0	0	0	0	0	0	0	0	0	0	0	1	0	0	0	0	Catalyzes the NAD( )-dependent oxidation of formate to carbon dioxide. Formate oxidation is the final step in the methanol oxidation pathway in methylotrophic microorganisms. Has a role in the detoxification of exogenous formate in non- methylotrophic organisms	GO:0046983	protein dimerization activity
EHS25_002548	0	0	0	0	0	0	0	0	0	1	0	1	1	0	0	0	0	0	Adds the first Dol-P-Man derived mannose in an alpha-1,3 linkage to Man(5)GlcNAc(2)-PP-Dol	GO:0005524	ATP binding
EHS25_002558	0	0	0	1	1	0	0	0	0	0	0	0	0	0	0	0	0	0	component of the eukaryotic translation initiation factor 3 (eIF-3) complex, which is involved in protein synthesis of a specialized repertoire of mRNAs and, together with other initiation factors, stimulates binding of mRNA and methionyl-tRNAi to the 40S ribosome. The eIF-3 complex specifically targets and initiates translation of a subset of mRNAs involved in cell proliferation	GO:0005524	ATP binding
EHS25_002562	0	0	0	0	0	0	0	0	0	1	0	0	0	0	0	0	0	0	Methylenetetrahydrofolate reductase	GO:0017124	SH3 domain binding
EHS25_002568	0	0	0	0	0	0	0	0	0	0	0	0	0	1	0	1	0	0	Cytochrome c oxidase polypeptide iv, mitochondrial	GO:0008270	zinc ion binding
EHS25_002576	0	0	0	0	0	0	0	1	1	0	0	0	0	0	0	0	0	0	Transcription factor	GO:0016491	oxidoreductase activity
EHS25_002577	0	0	0	0	0	0	0	0	0	0	0	0	0	1	0	0	0	0	HpcH/HpaI aldolase/citrate lyase family	GO:0003676	nucleic acid binding
EHS25_002585	0	0	0	2	0	1	0	0	0	0	0	0	0	0	0	0	0	0	This magnesium-dependent enzyme catalyzes the hydrolysis of ATP coupled with the transport of calcium	GO:0016491	oxidoreductase activity
EHS25_002589	0	0	0	0	1	1	0	0	0	0	0	0	0	0	0	0	0	0	ER lumen protein retaining receptor	GO:0046923	ER retention sequence binding
EHS25_002596	0	0	0	0	0	0	0	0	0	1	1	0	0	0	0	0	0	0	VIT family	GO:0005381	iron ion transmembrane transporter activity
EHS25_002605	0	0	0	0	0	0	0	0	0	0	1	0	0	0	0	0	0	0	ABC transporter transmembrane region	GO:0005524	ATP binding
EHS25_002620	0	0	0	0	0	0	0	1	1	0	0	0	0	0	0	0	0	0	PA14 domain	GO:0003677	DNA binding
EHS25_002646	0	0	1	0	0	0	0	0	0	0	0	0	0	0	0	0	0	0	F-Box protein	GO:0030374	nuclear receptor transcription coactivator activity
EHS25_002651	0	0	1	0	0	0	0	0	0	0	0	0	0	0	0	0	0	0	CAF1 family ribonuclease	GO:0046872	metal ion binding
EHS25_002662	0	0	0	0	0	0	0	0	0	0	0	0	0	1	0	0	0	0	Aminotransferase class-V	GO:0008453	alanine-glyoxylate transaminase activity
EHS25_002664	0	0	0	0	0	0	0	0	1	0	0	0	0	0	0	0	0	0	DNA helicase	GO:0003677	DNA binding
EHS25_002667	0	0	0	1	0	0	0	0	0	0	0	0	0	0	0	0	0	0	Tim17/Tim22/Tim23/Pmp24 family	GO:0005778	peroxisomal membrane
EHS25_002678	0	0	0	0	0	0	0	0	0	0	0	0	0	1	0	0	0	0	Outer mitochondrial membrane transport complex protein	GO:0016021	integral component of membrane
EHS25_002690	0	0	0	0	0	0	0	0	0	0	0	0	0	1	0	0	0	0	Uncharacterized ACR, YdiU/UPF0061 family	GO:0016875	ligase activity, forming carbon-oxygen bonds
EHS25_002692	0	0	0	0	0	0	0	0	0	0	0	0	0	1	0	0	0	0	Phospholipase A-2-activating protein	GO:0043130	ubiquitin binding
EHS25_002698	0	0	0	0	1	0	0	0	0	0	0	0	0	0	0	0	0	0	ABC transporter transmembrane region	GO:1904680	peptide transmembrane transporter activity
EHS25_002726	0	0	0	0	0	0	0	0	0	0	0	0	0	1	0	0	0	0	Component of the microsomal membrane bound fatty acid elongation system, which produces the 26-carbon very long-chain fatty acids (VLCFA) from palmitate. Catalyzes the reduction of the 3-ketoacyl-CoA intermediate that is formed in each cycle of fatty acid elongation. VLCFAs serve as precursors for ceramide and sphingolipids	GO:0045703	ketoreductase activity
EHS25_002729	0	0	0	1	0	0	0	0	0	0	0	0	0	0	0	0	0	0	pseudouridylate synthase	GO:0140101	catalytic activity, acting on a tRNA
EHS25_002733	0	0	0	0	0	0	0	0	0	0	0	0	0	1	0	0	0	0	AhpC/TSA family	GO:0005524	ATP binding
EHS25_002734	0	0	0	0	0	0	0	0	0	0	0	0	0	1	0	0	0	0	Exonuclease	GO:0016740	transferase activity
EHS25_002770	0	0	0	0	0	0	0	0	0	0	0	0	0	1	0	0	0	0	Key enzyme for ketone body catabolism. Transfers the CoA moiety from succinate to acetoacetate. Formation of the enzyme-CoA intermediate proceeds via an unstable anhydride species formed between the carboxylate groups of the enzyme and substrate	GO:0016787	hydrolase activity
EHS25_002787	0	0	0	0	0	0	0	1	1	0	0	0	0	0	0	0	0	0	Fungal specific transcription factor domain	GO:0003677	DNA binding
EHS25_002819	0	0	0	0	0	0	0	0	0	1	0	0	0	0	0	0	0	0	Mitochondrial ribosomal protein L51 / S25 / CI-B8 domain	GO:0005739	mitochondrion
EHS25_002821	0	1	1	0	0	0	0	0	0	0	0	0	0	0	0	0	0	0	Nucleosome assembly protein I	GO:0003682	chromatin binding
EHS25_002826	0	0	0	1	0	0	0	0	0	0	0	0	0	0	0	0	0	0	Functions as actin-binding component of the Arp2 3 complex which is involved in regulation of actin polymerization and together with an activating nucleation-promoting factor (NPF) mediates the formation of branched actin networks	GO:0005200	structural constituent of cytoskeleton
EHS25_002827	0	0	0	0	0	0	0	0	0	0	0	0	0	1	0	0	0	0	Belongs to the FPP GGPP synthase family	GO:0004311	farnesyltranstransferase activity
EHS25_002837	0	0	0	0	0	0	0	0	0	0	0	0	0	1	0	0	0	0	Acyl transferase domain	GO:0008270	zinc ion binding
EHS25_002838	0	0	0	0	0	0	0	0	0	0	0	0	0	1	0	0	0	0	Beta-ketoacyl synthase, C-terminal domain	GO:0016787	hydrolase activity
EHS25_002846	0	0	0	0	0	0	0	0	0	0	0	0	0	1	0	0	0	0	Peroxisomal membrane protein (Pex16)	GO:0005778	peroxisomal membrane
EHS25_002857	1	0	1	0	0	0	0	0	0	0	0	0	0	0	0	0	0	0	Required for endonucleolytic cleavage during polyadenylation-dependent pre-mRNA 3'-end formation	GO:0051731	polynucleotide 5'-hydroxyl-kinase activity
EHS25_002869	0	0	1	0	0	0	0	0	0	0	0	0	0	0	0	0	0	0	Formyl transferase, C-terminal domain	GO:0004479	methionyl-tRNA formyltransferase activity
EHS25_002873	0	0	0	0	0	0	0	0	0	0	0	0	0	1	0	0	0	0	component of the eukaryotic translation initiation factor 3 (eIF-3) complex, which is involved in protein synthesis of a specialized repertoire of mRNAs and, together with other initiation factors, stimulates binding of mRNA and methionyl-tRNAi to the 40S ribosome. The eIF-3 complex specifically targets and initiates translation of a subset of mRNAs involved in cell proliferation	GO:0003743	translation initiation factor activity
EHS25_002887	0	0	0	0	0	0	0	0	0	0	0	0	0	1	0	0	0	0	Voltage gated chloride channel	GO:0015299	solute:proton antiporter activity
EHS25_002892	0	0	0	1	0	0	0	0	0	0	0	0	0	0	0	0	0	0	CHCH domain	GO:0015035	protein disulfide oxidoreductase activity
EHS25_002897	0	0	0	0	0	0	0	0	0	1	0	0	0	0	0	0	0	0	Belongs to the universal ribosomal protein uL1 family	GO:0004180	carboxypeptidase activity
EHS25_002903	0	0	0	0	0	0	0	0	0	0	0	0	0	1	0	1	0	0	Glucosamine-6-phosphate isomerases/6-phosphogluconolactonase	GO:0046872	metal ion binding
EHS25_002906	0	0	0	0	0	0	0	0	1	0	0	0	0	0	0	0	0	0	DNA replication factor Dna2	GO:0008168	methyltransferase activity
EHS25_002907	1	1	1	0	0	0	0	0	0	0	0	0	0	0	0	0	0	0	Fcf1	GO:0005730	nucleolus
EHS25_002926	0	0	0	0	0	0	0	0	0	1	0	0	0	0	0	0	0	0	Ribosomal protein S6	GO:0003735	structural constituent of ribosome
EHS25_002934	0	0	0	0	0	0	0	0	1	0	0	0	0	0	0	0	0	0	DNA-dependent RNA polymerase catalyzes the transcription of DNA into RNA using the four ribonucleoside triphosphates as substrates	GO:0046872	metal ion binding
EHS25_002955	0	0	0	0	0	0	0	0	0	0	0	0	0	1	0	1	0	0	Provides the precursors necessary for DNA synthesis. Catalyzes the biosynthesis of deoxyribonucleotides from the corresponding ribonucleotides	GO:0016614	oxidoreductase activity, acting on CH-OH group of donors
EHS25_002957	0	0	0	0	0	0	0	0	0	0	0	0	0	0	0	0	1	0	Galactose mutarotase-like	GO:0004553	hydrolase activity, hydrolyzing O-glycosyl compounds
EHS25_002970	0	0	0	0	0	0	0	0	0	0	0	0	0	1	0	1	0	0	Dihydroorotate dehydrogenase, mitochondrial precursor	GO:0004152	dihydroorotate dehydrogenase activity
EHS25_002988	0	0	1	0	0	0	0	0	0	0	0	0	0	0	0	0	0	0	Multifunctional protein that exhibits several independent functions at different levels of the cellular processes. 5'-3' exonuclease component of the nonsense-mediated mRNA decay (NMD) which is a highly conserved mRNA degradation pathway, an RNA surveillance system whose role is to identify and rid cells of mRNA with premature termination codons and thus prevents accumulation of potentially harmf…	GO:0005524	ATP binding
EHS25_002998	0	0	1	0	0	0	0	0	0	0	0	0	0	0	0	0	0	0	Histone-like transcription factor (CBF/NF-Y) and archaeal histone	GO:0003690	double-stranded DNA binding
EHS25_003004	0	0	0	0	0	0	0	0	0	0	0	0	0	0	0	0	1	0	hydrolase activity, hydrolyzing O-glycosyl compounds	GO:0004553	hydrolase activity, hydrolyzing O-glycosyl compounds
EHS25_003017	0	1	0	0	0	0	0	0	0	0	0	0	0	0	0	0	0	0	Domain in UVSB PI-3 kinase, MEI-41 and ESR-1	GO:0005524	ATP binding
EHS25_003018	0	0	0	1	1	1	1	0	0	0	0	0	0	0	0	0	0	0	Belongs to the eukaryotic ribosomal protein eL6 family	GO:0003729	mRNA binding
EHS25_003033	1	1	1	0	0	0	0	0	0	0	0	0	0	0	0	0	0	0	RNA 3'-terminal phosphate cyclase (RTC), insert domain	GO:0004521	endoribonuclease activity
EHS25_003035	0	0	0	0	0	0	0	0	0	0	0	0	0	1	0	0	0	0	Belongs to the small GTPase superfamily. Rho family	GO:0031681	G-protein beta-subunit binding
EHS25_003042	0	0	0	1	0	0	0	0	0	0	0	0	0	0	0	0	0	0	n-acetyltransferase	GO:0008080	N-acetyltransferase activity
EHS25_003046	0	0	0	1	1	0	0	0	0	0	0	0	0	0	0	0	0	0	YT521-B-like domain	GO:0003723	RNA binding
EHS25_003054	0	0	0	0	0	0	0	0	0	1	0	0	0	0	0	0	0	0	Replication factor C C-terminal domain	GO:0005515	protein binding
EHS25_003060	1	0	1	0	0	0	0	0	0	0	0	0	0	0	0	0	0	0	RNA dependent RNA polymerase	GO:0005515	protein binding
EHS25_003062	0	0	0	0	0	0	0	0	0	0	0	0	0	1	0	1	0	0	Phosphoribosyl synthetase-associated domain	GO:0140096	catalytic activity, acting on a protein
EHS25_003080	1	1	1	0	0	0	0	0	0	0	0	0	0	0	0	0	0	0	Utp25, U3 small nucleolar RNA-associated SSU processome protein 25	GO:0019843	rRNA binding
EHS25_003099	0	0	0	0	0	0	0	0	0	0	0	0	0	1	0	0	0	0	Catalyzes the NAD( )-dependent oxidation of formate to carbon dioxide. Formate oxidation is the final step in the methanol oxidation pathway in methylotrophic microorganisms. Has a role in the detoxification of exogenous formate in non- methylotrophic organisms	GO:0005524	ATP binding
EHS25_003101	0	0	0	0	0	0	0	0	0	0	0	0	0	1	0	0	0	0	Thymidylate kinase	GO:0016787	hydrolase activity
EHS25_003114	0	0	0	0	0	0	0	0	1	0	0	0	0	0	0	0	0	0	impB/mucB/samB family C-terminal domain	GO:0046872	metal ion binding
EHS25_003124	0	0	1	0	0	0	0	0	0	0	0	0	0	0	0	0	0	0	G1 phase of mitotic cell cycle-related protein	GO:0016730	oxidoreductase activity, acting on iron-sulfur proteins as donors
EHS25_003131	0	0	1	0	0	0	0	0	0	0	0	0	0	0	0	0	0	0	Ubiquitin-like protein	GO:0031386	protein tag
EHS25_003135	0	0	0	0	0	0	0	0	1	0	0	0	0	0	0	0	0	0	Control of topological states of DNA by transient breakage and subsequent rejoining of DNA strands. Topoisomerase II makes double-strand breaks	GO:0004812	aminoacyl-tRNA ligase activity
EHS25_003139	0	0	0	0	0	0	0	1	0	0	0	0	0	0	0	0	0	0	Extension to Ser/Thr-type protein kinases	GO:0031369	translation initiation factor binding
EHS25_003141	0	0	0	0	1	0	0	0	0	0	0	0	0	0	0	0	0	0	Accessory subunit of the mitochondrial membrane respiratory chain NADH dehydrogenase (Complex I), that is believed not to be involved in catalysis. Complex I functions in the transfer of electrons from NADH to the respiratory chain. The immediate electron acceptor for the enzyme is believed to be ubiquinone	GO:0016491	oxidoreductase activity
EHS25_003142	0	0	0	1	0	0	0	0	0	0	0	0	0	0	0	0	0	0	Endoplasmic Reticulum-Golgi Intermediate Compartment (ERGIC)	GO:0016021	integral component of membrane
EHS25_003145	0	0	0	1	1	0	0	0	0	0	0	0	0	0	0	0	0	0	Heat shock protein sks2 (heat shock cognate protein hsc1)	GO:0031072	heat shock protein binding
EHS25_003146	0	0	1	0	0	0	0	0	0	0	0	0	0	0	0	0	0	0	IPP transferase	GO:0005524	ATP binding
EHS25_003149	0	0	0	0	0	0	0	0	0	0	0	0	0	0	1	0	0	0	26S proteasome non-ATPase, regulatory subunit	GO:0000502	proteasome complex
EHS25_003150	0	0	0	0	0	0	0	0	0	0	0	0	0	1	0	0	0	0	Component of the MICOS complex, a large protein complex of the mitochondrial inner membrane that plays crucial roles in the maintenance of crista junctions, inner membrane architecture, and formation of contact sites to the outer membrane	GO:0005634	nucleus
EHS25_003157	0	0	0	0	0	0	0	0	0	0	0	0	0	1	0	0	0	0	Regulator of type 1 phosphatases which maintains protein phosphatase activity under strict control	GO:0003735	structural constituent of ribosome
EHS25_003162	0	0	0	0	0	0	0	0	0	0	0	0	0	1	0	0	0	0	Succinate dehydrogenase/Fumarate reductase transmembrane subunit	GO:0046872	metal ion binding
EHS25_003165	0	0	0	1	0	0	0	0	0	0	0	0	0	0	0	0	0	0	BAR domain	GO:0005737	cytoplasm
EHS25_003172	0	0	0	0	0	0	0	0	0	0	1	0	0	0	0	0	0	0	Major Facilitator Superfamily	GO:0022857	transmembrane transporter activity
EHS25_003182	0	0	0	0	0	0	0	0	0	0	0	0	0	1	0	0	0	0	assists the folding of proteins upon ATP hydrolysis	GO:0016491	oxidoreductase activity
EHS25_003195	0	0	0	0	0	0	0	0	0	0	0	0	0	1	0	0	0	0	Belongs to the enoyl-CoA hydratase isomerase family	GO:0016853	isomerase activity
EHS25_003203	0	0	0	0	0	0	0	1	0	0	0	0	0	0	0	0	0	0	Acetyltransferase (GNAT) domain	GO:0016853	isomerase activity
EHS25_003210	0	0	0	1	0	1	0	0	0	0	0	0	0	0	0	0	0	0	integral component of membrane	GO:0016021	integral component of membrane
EHS25_003211	0	0	0	0	0	0	0	0	0	0	0	0	0	1	0	0	0	0	Serine aminopeptidase, S33	GO:0016298	lipase activity
EHS25_003212	0	0	0	0	0	0	0	0	0	0	0	0	0	1	0	0	0	0	Snare region anchored in the vesicle membrane C-terminus	GO:0000149	SNARE binding
EHS25_003221	0	0	0	0	0	0	0	0	0	0	0	0	0	1	0	0	0	0	Functions as component of the Arp2 3 complex which is involved in regulation of actin polymerization and together with an activating nucleation-promoting factor (NPF) mediates the formation of branched actin networks	GO:0003676	nucleic acid binding
EHS25_003222	0	0	0	0	1	0	0	0	0	0	0	0	0	0	0	0	0	0	Removes the N-terminal methionine from nascent proteins. The N-terminal methionine is often cleaved when the second residue in the primary sequence is small and uncharged (Met-Ala-, Cys, Gly, Pro, Ser, Thr, or Val)	GO:0004222	metalloendopeptidase activity
EHS25_003226	0	0	0	0	1	0	0	0	0	0	0	0	0	0	0	0	0	0	Est1 DNA/RNA binding domain	GO:0042162	telomeric DNA binding
EHS25_003227	0	0	0	0	0	0	0	0	0	1	1	0	0	0	0	0	0	0	X-domain of DnaJ-containing	GO:0016021	integral component of membrane
EHS25_003229	0	0	0	0	0	0	0	0	0	0	0	0	0	1	0	0	0	0	DASH complex subunit Dad2	GO:0051233	spindle midzone
EHS25_003235	0	0	0	0	0	0	0	0	0	0	0	0	0	1	0	0	0	0	C-terminal to LisH motif.	GO:0046872	metal ion binding
EHS25_003242	0	0	0	0	0	0	0	0	0	0	0	0	0	1	0	0	0	0	Clp amino terminal domain, pathogenicity island component	GO:0008233	peptidase activity
EHS25_003245	0	0	0	0	0	0	0	0	1	0	0	0	0	0	0	0	0	0	impB/mucB/samB family C-terminal domain	GO:0016740	transferase activity
EHS25_003253	0	0	0	0	1	1	0	0	0	0	0	0	0	0	0	0	0	0	Protein of unknown function (DUF1077)	GO:0098796	membrane protein complex
EHS25_003273	0	0	0	0	0	0	0	0	0	0	1	0	0	0	0	0	0	0	Catalyzes the reversible phosphorylation of S-methyl-5'- thioadenosine (MTA) to adenine and 5-methylthioribose-1-phosphate. Involved in the breakdown of MTA, a major by-product of polyamine biosynthesis. Responsible for the first step in the methionine salvage pathway after MTA has been generated from S- adenosylmethionine. Has broad substrate specificity with 6- aminopurine nucleosides as prefer…	GO:0003729	mRNA binding
EHS25_003275	1	1	1	0	0	0	0	0	0	0	0	0	0	0	0	0	0	0	helicase superfamily c-terminal domain	GO:0140098	catalytic activity, acting on RNA
EHS25_003295	0	0	0	1	0	1	0	0	0	0	0	0	0	0	0	0	0	0	DHHC palmitoyltransferase	GO:0019706	protein-cysteine S-palmitoyltransferase activity
EHS25_003300	0	0	0	0	0	0	0	0	0	0	0	0	0	1	0	0	0	0	Amidohydrolase family	GO:0016810	hydrolase activity, acting on carbon-nitrogen (but not peptide) bonds
EHS25_003312	0	0	0	0	0	0	0	0	0	0	0	0	0	1	0	0	0	0	peroxisome organization and biogenesis-related protein	GO:0005779	integral component of peroxisomal membrane
EHS25_003332	0	0	0	0	0	0	0	1	1	0	0	0	0	0	0	0	0	0	bZIP transcription factor	GO:0003677	DNA binding
EHS25_003335	0	0	0	2	0	0	1	0	0	0	0	0	0	0	0	0	0	0	ribosomal protein	GO:0003735	structural constituent of ribosome
EHS25_003336	0	0	0	0	0	0	0	0	0	1	1	0	0	0	0	0	0	0	Mitochondrial import inner membrane translocase subunit tim14	GO:0001671	ATPase activator activity
EHS25_003338	0	0	0	0	0	0	0	0	0	0	0	0	0	1	0	0	0	0	Chaperone activator	GO:0051087	chaperone binding
EHS25_003344	0	0	1	0	0	0	0	0	0	0	0	0	0	0	0	0	0	0	Anticodon-binding domain of tRNA	GO:0005524	ATP binding
EHS25_003348	0	0	0	0	0	0	0	0	0	0	0	0	0	1	0	0	0	0	EAP30/Vps36 family	GO:0046872	metal ion binding
EHS25_003364	0	1	1	0	0	0	0	0	0	0	0	0	0	0	0	0	0	0	Methyltransferase involved in Williams-Beuren syndrome	GO:0016435	rRNA (guanine) methyltransferase activity
EHS25_003374	0	0	1	0	0	0	0	0	0	0	0	0	0	0	0	0	0	0	Sugar (and other) transporter	GO:0003677	DNA binding
EHS25_003396	0	0	0	0	0	0	0	0	0	0	0	0	0	1	0	0	0	0	Adaptin C-terminal domain	GO:0030276	clathrin binding
EHS25_003399	0	0	0	0	0	0	0	1	0	0	0	0	0	0	0	0	0	0	GAL4-like Zn(II)2Cys6 (or C6 zinc) binuclear cluster DNA-binding domain	GO:0008270	zinc ion binding
EHS25_003403	0	0	0	0	0	0	0	0	0	0	0	0	0	1	0	0	0	0	Dak2	GO:0003729	mRNA binding
EHS25_003410	0	0	0	0	0	0	0	0	0	0	0	0	0	0	0	1	0	0	Ribose/Galactose Isomerase	GO:0004842	ubiquitin-protein transferase activity
EHS25_003413	0	0	0	0	1	0	0	0	0	0	0	0	0	0	0	0	0	0	Triose-phosphate Transporter family	GO:0005457	GDP-fucose transmembrane transporter activity
EHS25_003416	0	0	0	0	0	0	0	0	0	0	0	0	0	1	0	0	0	0	Glycosyl transferase family, a/b domain	GO:0016829	lyase activity
EHS25_003420	0	0	0	0	0	0	0	0	0	0	0	0	0	1	0	0	0	0	Required both for recombination and for the repair of DNA damage caused by X-rays	GO:0003684	damaged DNA binding
EHS25_003422	0	0	0	1	1	0	1	0	0	0	0	0	0	0	0	0	0	0	ribosomal protein L27	GO:0003735	structural constituent of ribosome
EHS25_003437	0	0	0	1	1	0	1	0	0	0	0	0	0	0	0	0	0	0	Belongs to the eukaryotic ribosomal protein eS4 family	GO:0005524	ATP binding
EHS25_003446	0	0	0	1	1	0	1	0	0	0	0	0	0	0	0	0	0	0	structural constituent of ribosome	GO:0003735	structural constituent of ribosome
EHS25_003447	0	0	0	0	1	0	0	0	0	0	0	0	0	0	0	0	0	0	Belongs to the mitochondrial carrier (TC 2.A.29) family	GO:0015116	sulfate transmembrane transporter activity
EHS25_003448	0	0	1	0	0	0	0	0	0	0	0	0	0	0	0	0	0	0	Adds a GMP to the 5'-end of tRNA(His) after transcription and RNase P cleavage	GO:0005524	ATP binding
EHS25_003449	0	0	0	0	1	0	0	0	0	0	0	0	0	0	0	0	0	0	ATP12 chaperone protein	GO:0005739	mitochondrion
EHS25_003452	0	0	0	0	0	0	0	0	0	0	0	0	0	1	0	0	0	0	Tryptophan 2,3-dioxygenase	GO:0016701	oxidoreductase activity, acting on single donors with incorporation of molecular oxygen
EHS25_003460	0	0	0	1	0	1	0	0	0	0	0	0	0	0	0	0	0	0	Serine aminopeptidase, S33	GO:0004622	lysophospholipase activity
EHS25_003465	0	0	1	0	0	0	0	0	0	0	0	0	0	0	0	0	0	0	Pyruvate kinase, barrel domain	GO:0140096	catalytic activity, acting on a protein
EHS25_003469	0	0	0	2	0	0	1	0	0	0	0	0	0	0	0	0	0	0	Mitochondrial ribosomal subunit protein	GO:0003676	nucleic acid binding
EHS25_003470	1	1	0	0	0	0	0	0	0	0	0	0	0	0	0	0	0	0	metallochaperone-like domain	GO:0004497	monooxygenase activity
EHS25_003471	0	0	0	0	0	0	0	0	0	0	0	0	0	1	0	0	0	0	Nucleotidyl transferase	GO:0005525	GTP binding
EHS25_003486	0	0	0	0	1	1	0	0	0	0	0	0	0	0	0	0	0	0	GPI biosynthesis protein family Pig-F	GO:0016021	integral component of membrane
EHS25_003491	0	0	0	0	0	0	0	0	0	0	0	0	0	1	0	0	0	0	DASH complex subunit Dad3	GO:0016021	integral component of membrane
EHS25_003502	0	0	0	0	0	0	0	0	0	0	0	0	0	1	0	0	0	0	WD40 repeats	GO:0016020	membrane
EHS25_003522	0	1	1	0	0	0	0	0	0	0	0	0	0	0	0	0	0	0	Rio2, N-terminal	GO:0008270	zinc ion binding
EHS25_003540	0	0	0	0	1	0	0	0	0	0	0	0	0	0	0	0	0	0	Cytoplasmic phospholipase A2, catalytic subunit	GO:0004623	phospholipase A2 activity
EHS25_003546	0	0	0	0	0	0	0	0	0	0	0	0	0	1	0	0	0	0	component of the eukaryotic translation initiation factor 3 (eIF-3) complex, which is involved in protein synthesis of a specialized repertoire of mRNAs and, together with other initiation factors, stimulates binding of mRNA and methionyl-tRNAi to the 40S ribosome. The eIF-3 complex specifically targets and initiates translation of a subset of mRNAs involved in cell proliferation	GO:0003743	translation initiation factor activity
EHS25_003560	0	0	0	0	0	0	0	0	0	0	0	0	0	1	0	0	0	0	Peroxisomal membrane anchor protein (Pex14p) conserved region	GO:0005102	signaling receptor binding
EHS25_003568	1	1	0	0	0	0	0	0	0	0	0	0	0	0	0	0	0	0	K homology RNA-binding domain	GO:0003723	RNA binding
EHS25_003571	0	0	0	0	0	0	0	0	1	0	0	0	0	0	0	0	0	0	helicase superfamily c-terminal domain	GO:0009378	four-way junction helicase activity
EHS25_003576	1	0	1	0	0	0	0	0	0	0	0	0	0	0	0	0	0	0	Protein kinase domain	GO:0046872	metal ion binding
EHS25_003589	0	0	0	0	1	1	0	0	0	0	0	0	0	0	0	0	0	0	Oxidoreductase FAD-binding domain	GO:0046872	metal ion binding
EHS25_003592	0	0	0	0	0	0	0	0	0	0	0	0	0	1	0	0	0	0	minichromosome maintenance proteins	GO:0005525	GTP binding
EHS25_003600	0	0	0	0	0	0	0	0	0	0	0	0	0	1	1	0	0	0	Proteasome/cyclosome repeat	GO:0016616	oxidoreductase activity, acting on the CH-OH group of donors, NAD or NADP as acceptor
EHS25_003609	0	0	0	0	0	0	0	1	1	0	0	0	0	0	0	0	0	0	Folic acid and derivative biosynthesis-related protein	GO:0003677	DNA binding
EHS25_003616	0	0	0	0	0	0	0	1	0	0	0	0	0	0	0	0	0	0	GAL4-like Zn(II)2Cys6 (or C6 zinc) binuclear cluster DNA-binding domain	GO:0008270	zinc ion binding
EHS25_003623	0	0	0	0	0	0	0	0	1	0	0	0	0	0	0	0	0	0	FMN-dependent dehydrogenase	GO:0003677	DNA binding
EHS25_003643	0	0	0	0	0	0	0	0	0	0	0	0	0	1	0	0	0	0	RhoGEF domain	GO:0017048	Rho GTPase binding
EHS25_003644	0	0	0	0	0	0	0	0	0	0	0	0	0	1	0	0	0	0	Belongs to the peptidase S33 family	GO:0005524	ATP binding
EHS25_003645	0	0	0	1	0	0	0	0	0	0	0	0	0	0	0	0	0	0	Peptide alpha-N-acetyltransferase	GO:0016740	transferase activity
EHS25_003648	0	0	0	0	0	0	0	0	0	0	0	0	0	1	0	0	0	0	Mannose-6-phosphate isomerase	GO:0022857	transmembrane transporter activity
EHS25_003658	0	0	0	0	0	0	0	0	0	0	0	0	0	1	0	1	0	0	Belongs to the GHMP kinase family. Mevalonate kinase subfamily	GO:0016491	oxidoreductase activity
EHS25_003683	0	0	0	2	0	0	1	0	0	0	0	0	0	0	0	0	0	0	Ribosomal protein S16	GO:0003735	structural constituent of ribosome
EHS25_003711	0	0	0	0	0	0	0	0	0	0	0	0	0	1	0	0	0	0	RNA-binding component of the eukaryotic translation initiation factor 3 (eIF-3) complex, which is involved in protein synthesis of a specialized repertoire of mRNAs and, together with other initiation factors, stimulates binding of mRNA and methionyl-tRNAi to the 40S ribosome. The eIF-3 complex specifically targets and initiates translation of a subset of mRNAs involved in cell proliferation. Thi…	GO:0003743	translation initiation factor activity
EHS25_003724	0	0	0	0	0	0	0	0	0	1	1	0	0	0	0	0	0	0	grpe protein	GO:0016787	hydrolase activity
EHS25_003726	0	0	1	0	0	0	0	0	0	0	0	0	0	0	0	0	0	0	pre-mRNA splicing factor component	GO:0003677	DNA binding
EHS25_003734	0	0	0	0	0	0	0	0	0	1	1	0	0	0	0	0	0	0	Peptidase S24-like	GO:0004175	endopeptidase activity
EHS25_003736	0	0	0	0	0	0	0	0	0	0	0	0	0	1	0	0	0	0	Serine carboxypeptidase	GO:0005524	ATP binding
EHS25_003763	0	0	0	0	0	0	0	0	0	1	1	1	0	0	0	0	0	0	EF-hand domain	GO:0005524	ATP binding
EHS25_003771	0	0	0	0	0	0	0	0	0	0	0	0	0	1	0	0	0	0	Arginase family	GO:0016829	lyase activity
EHS25_003778	0	0	0	1	0	0	0	0	0	0	0	0	0	0	0	0	0	0	assists the folding of proteins upon ATP hydrolysis	GO:0016301	kinase activity
EHS25_003779	0	0	0	1	0	1	0	0	0	0	0	0	0	0	0	0	0	0	Gpi16 subunit, GPI transamidase component	GO:0042765	GPI-anchor transamidase complex
EHS25_003788	0	0	0	0	1	1	0	0	0	0	0	0	0	0	0	0	0	0	UAA transporter family	GO:0015297	antiporter activity
EHS25_003795	0	0	1	0	0	0	0	0	0	0	0	0	0	0	0	0	0	0	GAL4-like Zn(II)2Cys6 (or C6 zinc) binuclear cluster DNA-binding domain	GO:0003677	DNA binding
EHS25_003801	0	0	0	0	0	0	0	0	0	0	0	0	0	1	0	0	0	0	PRELI-like family	GO:0016740	transferase activity
EHS25_003814	0	0	0	0	0	0	0	0	0	0	0	0	0	0	0	1	0	0	RING-like zinc finger	GO:0030247	polysaccharide binding
EHS25_003816	0	0	0	0	0	0	0	0	0	0	0	0	0	1	0	0	0	0	Microsomal signal peptidase 25 kDa subunit (SPC25)	GO:0008233	peptidase activity
EHS25_003824	0	0	0	0	1	0	0	0	0	0	0	0	0	0	0	0	0	0	Translin	GO:0004521	endoribonuclease activity
EHS25_003832	0	0	0	0	0	0	0	0	0	0	0	0	0	1	0	0	0	0	The coatomer is a cytosolic protein complex that binds to dilysine motifs and reversibly associates with Golgi non- clathrin-coated vesicles, which further mediate biosynthetic protein transport from the ER, via the Golgi up to the trans Golgi network	GO:0005198	structural molecule activity
EHS25_003850	0	0	0	0	0	0	0	1	0	0	0	0	0	0	0	0	0	0	DNA-binding transcription factor activity	GO:0003700	DNA-binding transcription factor activity
EHS25_003879	0	0	0	0	0	0	0	0	0	0	0	0	0	1	0	0	0	0	Belongs to the Rab GDI family	GO:0016740	transferase activity
EHS25_003880	1	0	1	0	0	0	0	0	0	0	0	0	0	0	0	0	0	0	Plays a complex role in regulating the basal catalytic activity of the alpha subunit	GO:0003735	structural constituent of ribosome
EHS25_003891	0	0	0	1	0	1	0	0	0	0	0	0	0	0	0	0	0	0	KR domain	GO:0047560	3-dehydrosphinganine reductase activity
EHS25_003894	0	0	0	2	0	0	1	0	0	0	0	0	0	0	0	0	0	0	Ribosomal protein P0 is the functional equivalent of E.coli protein L10	GO:0003735	structural constituent of ribosome
EHS25_003896	0	0	0	0	0	0	0	1	1	0	0	0	0	0	0	0	0	0	Fungal specific transcription factor domain	GO:0003677	DNA binding
EHS25_003898	0	0	0	0	0	0	0	0	0	0	0	0	0	1	0	0	0	0	HpcH/HpaI aldolase/citrate lyase family	GO:0003676	nucleic acid binding
EHS25_003911	0	0	0	0	0	0	0	1	0	0	0	0	0	0	0	0	0	0	D-isomer specific 2-hydroxyacid dehydrogenase, NAD binding domain	GO:0003714	transcription corepressor activity
EHS25_003923	0	0	0	0	0	0	0	0	0	0	0	0	0	0	0	0	1	0	Belongs to the glycosyl hydrolase 2 family	GO:0030246	carbohydrate binding
EHS25_003928	0	0	0	0	0	0	0	0	0	0	0	0	0	0	0	0	1	0	Beta-galactosidase	GO:0004565	beta-galactosidase activity
EHS25_003981	0	0	0	0	0	0	0	0	0	0	1	0	0	0	0	0	0	0	Sugar (and other) transporter	GO:0022857	transmembrane transporter activity
EHS25_003990	0	0	0	0	0	0	0	0	0	0	0	0	0	0	0	0	1	0	Belongs to the glycosyl hydrolase 43 family	GO:0004553	hydrolase activity, hydrolyzing O-glycosyl compounds
EHS25_004000	0	0	0	0	0	0	0	0	1	0	0	0	0	0	0	0	0	0	Thiamine pyrophosphate enzyme, N-terminal TPP binding domain	GO:0003677	DNA binding
EHS25_004010	0	0	0	0	0	0	0	0	0	0	1	0	0	0	0	0	0	0	MFS transporter, SIT family, siderophore-iron H symporter	GO:0022857	transmembrane transporter activity
EHS25_004020	0	0	0	0	0	0	0	0	0	0	0	0	0	1	0	1	0	0	Bifunctional DNA N-glycosylase with associated apurinic apyrimidinic (AP) lyase function that catalyzes the first step in base excision repair (BER), the primary repair pathway for the repair of oxidative DNA damage. The DNA N-glycosylase activity releases the damaged DNA base from DNA by cleaving the N- glycosidic bond, leaving an AP site. The AP lyase activity cleaves the phosphodiester bond 3'…	GO:0016627	oxidoreductase activity, acting on the CH-CH group of donors
EHS25_004028	0	0	0	0	1	0	0	0	0	0	0	0	0	0	0	0	0	0	Pleckstrin homology domain	GO:0016787	hydrolase activity
EHS25_004051	0	0	0	0	0	0	0	0	0	1	1	0	0	0	0	0	0	0	Lung seven transmembrane receptor	GO:0005829	cytosol
EHS25_004056	0	0	0	0	0	0	0	0	0	0	1	0	0	0	0	0	0	0	Sugar (and other) transporter	GO:0022857	transmembrane transporter activity
EHS25_004063	0	0	0	0	0	0	0	0	0	1	0	0	0	0	0	0	0	0	D-lactate dehydrogenase cytochrome oxidoreductase protein	GO:0016491	oxidoreductase activity
EHS25_004064	0	0	0	1	1	1	1	0	0	0	0	0	0	0	0	0	0	0	Belongs to the eukaryotic ribosomal protein eL15 family	GO:0016787	hydrolase activity
EHS25_004072	0	0	0	0	0	0	0	0	1	0	0	0	0	0	0	0	0	0	Transcription factor TFIID (or TATA-binding protein, TBP)	GO:0003682	chromatin binding
EHS25_004083	0	0	0	0	0	0	0	0	0	0	1	0	0	0	0	0	0	0	Major Facilitator Superfamily	GO:0022857	transmembrane transporter activity
EHS25_004088	0	0	0	0	0	0	0	0	1	0	0	0	0	0	0	0	0	0	Noc2p family	GO:0003677	DNA binding
EHS25_004098	0	0	0	0	0	0	0	0	0	0	0	0	0	1	0	0	0	0	Mitochondrial ribosomal protein L51 / S25 / CI-B8 domain	GO:0005743	mitochondrial inner membrane
EHS25_004100	0	0	0	0	0	0	0	0	0	1	1	0	0	0	0	0	0	0	Nascent polypeptide-associated complex subunit beta	GO:0004386	helicase activity
EHS25_004117	0	0	0	0	1	0	0	0	0	0	0	0	0	0	0	0	0	0	regulation of protein import into mitochondrial outer membrane	GO:0003723	RNA binding
EHS25_004118	0	0	0	2	0	0	0	0	0	0	0	0	0	0	0	0	0	0	WD domain, G-beta repeat	GO:0043022	ribosome binding
EHS25_004138	0	0	0	0	1	0	0	0	0	0	0	0	0	0	0	0	0	0	Catalytic subunit of tRNA (adenine-N(1)-)- methyltransferase, which catalyzes the formation of N(1)- methyladenine at position 58 (m1A58) in initiator methionyl-tRNA	GO:0016429	tRNA (adenine-N1-)-methyltransferase activity
EHS25_004148	0	0	0	0	0	0	0	0	0	0	0	0	0	1	0	0	0	0	Ribosomal protein S8	GO:0003735	structural constituent of ribosome
EHS25_004157	0	0	1	0	0	0	0	0	0	0	0	0	0	0	0	0	0	0	Helicase associated domain (HA2) Add an annotation	GO:0140098	catalytic activity, acting on RNA
EHS25_004170	0	0	0	0	0	0	0	0	0	1	1	0	0	0	0	0	0	0	Cytochrome C oxidase copper chaperone (COX17)	GO:0030170	pyridoxal phosphate binding
EHS25_004178	0	0	0	0	1	0	1	0	0	0	0	0	0	0	0	0	0	0	Glycosyl transferase family 21	GO:0005524	ATP binding
EHS25_004186	0	0	0	0	0	0	0	0	0	0	0	0	0	1	0	0	0	0	Ubiquitin homologues	GO:0031593	polyubiquitin modification-dependent protein binding
EHS25_004194	0	0	0	0	0	0	0	1	1	0	0	0	0	0	0	0	0	0	Belongs to the histone deacetylase family. HD Type 1 subfamily	GO:0016301	kinase activity
EHS25_004196	0	0	0	0	0	0	0	1	0	0	0	0	0	0	0	0	0	0	HAND	GO:0003676	nucleic acid binding
EHS25_004206	0	0	0	2	0	0	1	0	0	0	0	0	0	0	0	0	0	0	Ribosomal L38e protein family	GO:0003735	structural constituent of ribosome
EHS25_004207	0	0	0	1	0	0	0	0	0	0	0	0	0	0	0	0	0	0	Ribosomal protein L7Ae/L30e/S12e/Gadd45 family	GO:0016787	hydrolase activity
EHS25_004248	0	0	0	0	0	0	0	1	1	0	0	0	0	0	0	0	0	0	Fungal specific transcription factor domain	GO:0003677	DNA binding
EHS25_004275	0	0	0	0	0	0	0	0	0	1	1	0	0	0	0	0	0	0	Triose-phosphate Transporter family	GO:0005457	GDP-fucose transmembrane transporter activity
EHS25_004276	0	0	1	0	0	0	0	0	0	0	0	0	0	0	0	0	0	0	FORKHEAD	GO:0031176	endo-1,4-beta-xylanase activity
EHS25_004294	0	0	0	0	1	1	0	0	0	0	0	0	0	0	0	0	0	0	Type I phosphodiesterase / nucleotide pyrophosphatase	GO:0005525	GTP binding
EHS25_004317	0	0	0	0	0	0	0	0	0	0	0	0	0	1	0	0	0	0	Belongs to the TRAFAC class dynamin-like GTPase superfamily. Dynamin Fzo YdjA family	GO:0042802	identical protein binding
EHS25_004323	0	0	0	0	0	0	0	1	0	0	0	0	0	0	0	0	0	0	Belongs to the protein kinase superfamily	GO:0030332	cyclin binding
EHS25_004328	0	0	0	0	0	0	0	0	0	0	0	0	0	0	0	0	1	1	Glycosyl hydrolase family 10	GO:0005524	ATP binding
EHS25_004344	0	0	0	0	0	0	0	0	0	1	1	0	0	0	0	0	0	0	Belongs to the TRAFAC class dynamin-like GTPase superfamily. Dynamin Fzo YdjA family	GO:0005525	GTP binding
EHS25_004345	0	0	0	0	0	0	0	0	0	0	0	0	0	1	0	1	0	0	Transketolase, thiamine diphosphate binding domain	GO:0030170	pyridoxal phosphate binding
EHS25_004346	0	0	0	0	0	0	0	0	0	1	0	0	0	0	0	0	0	0	Belongs to the complex I LYR family	GO:0005743	mitochondrial inner membrane
EHS25_004347	0	0	0	0	0	0	0	1	1	0	0	0	0	0	0	0	0	0	Helical and beta-bridge domain	GO:0046872	metal ion binding
EHS25_004350	0	0	0	0	0	0	0	0	0	0	0	0	0	1	0	1	0	0	cAMP-dependent protein kinase	GO:0015078	proton transmembrane transporter activity
EHS25_004362	0	0	1	0	0	0	0	0	0	0	0	0	0	0	0	0	0	0	Functions as component of the transcription regulatory histone acetylation (HAT) complexes SAGA, SALSA and ADA. SAGA is involved in RNA polymerase II-dependent transcriptional regulation	GO:0016740	transferase activity
EHS25_004366	0	0	1	0	0	0	0	0	0	0	0	0	0	0	0	0	0	0	Zn-finger in ubiquitin-hydrolases and other protein	GO:0008270	zinc ion binding
EHS25_004371	0	0	0	0	0	0	0	0	0	0	0	0	0	1	0	0	0	0	Protein of unknown function (DUF726)	GO:0046872	metal ion binding
EHS25_004378	0	0	0	2	0	0	1	0	0	0	0	0	0	0	0	0	0	0	Ribosomal protein S10p/S20e	GO:0003723	RNA binding
EHS25_004381	0	0	1	0	0	0	0	0	0	0	0	0	0	0	0	0	0	0	mRNA (Guanine-N7-)-methyltransferase	GO:0003723	RNA binding
EHS25_004386	0	0	0	0	0	0	0	0	0	0	0	0	0	1	0	0	0	0	Endonuclease/Exonuclease/phosphatase family	GO:0052712	inositol phosphosphingolipid phospholipase activity
EHS25_004393	0	0	0	1	1	0	1	0	0	0	0	0	0	0	0	0	0	0	Ribosomal L32p protein family	GO:0003735	structural constituent of ribosome
EHS25_004400	0	0	0	0	0	0	0	0	0	0	0	0	0	1	0	0	0	0	Catalyzes the dehydration of methylthioribulose-1- phosphate (MTRu-1-P) into 2,3-diketo-5-methylthiopentyl-1- phosphate (DK-MTP-1-P)	GO:0003700	DNA-binding transcription factor activity
EHS25_004401	0	0	0	0	0	0	0	0	0	0	0	0	0	1	0	0	0	0	pseudouridylate synthase 4	GO:0003723	RNA binding
EHS25_004405	1	1	0	0	0	0	0	0	0	0	0	0	0	0	0	0	0	0	Brix	GO:0005730	nucleolus
EHS25_004409	0	0	0	0	0	0	0	0	0	1	0	0	0	0	0	0	0	0	Cytochrome oxidase complex assembly protein 1	GO:0016021	integral component of membrane
EHS25_004412	0	0	0	1	1	0	0	0	0	0	0	0	0	0	0	0	0	0	Ribosomal protein S7p/S5e	GO:0005840	ribosome
EHS25_004415	0	0	0	0	0	0	0	0	0	0	0	0	0	1	0	0	0	0	SCO1/SenC	GO:0005507	copper ion binding
EHS25_004416	1	1	1	0	0	0	0	0	0	0	0	0	0	0	0	0	0	0	RNA helicase	GO:0140098	catalytic activity, acting on RNA
EHS25_004423	0	0	0	2	0	0	1	0	0	0	0	0	0	0	0	0	0	0	Ribosomal protein L19	GO:0003735	structural constituent of ribosome
EHS25_004432	0	0	0	2	0	0	1	0	0	0	0	0	0	0	0	0	0	0	ribosomal L5P family C-terminus	GO:0003735	structural constituent of ribosome
EHS25_004436	0	0	0	0	1	1	0	0	0	0	0	0	0	0	0	0	0	0	Preprotein translocase subunit Sec66	GO:0016021	integral component of membrane
EHS25_004449	0	0	0	0	0	0	0	0	0	0	0	0	0	0	0	0	1	0	alpha,alpha-trehalase activity	GO:0004555	alpha,alpha-trehalase activity
EHS25_004451	0	0	0	0	0	0	0	0	1	0	0	0	0	0	0	0	0	0	Component of the post-replicative DNA mismatch repair system (MMR)	GO:0016740	transferase activity
EHS25_004452	1	0	1	0	0	0	0	0	0	0	0	0	0	0	0	0	0	0	DNA polymerase phi	GO:0003887	DNA-directed DNA polymerase activity
EHS25_004458	0	0	0	0	0	0	0	0	0	1	1	1	0	0	0	0	0	0	Endoplasmic Reticulum-Golgi Intermediate Compartment (ERGIC)	GO:0030176	integral component of endoplasmic reticulum membrane
EHS25_004463	0	0	0	0	0	0	0	0	0	0	0	0	0	1	0	0	0	0	assists the folding of proteins upon ATP hydrolysis	GO:0005525	GTP binding
EHS25_004480	1	1	0	0	0	0	0	0	0	0	0	0	0	0	0	0	0	0	RNA recognition motif	GO:0003723	RNA binding
EHS25_004481	0	0	0	0	0	0	0	1	1	0	0	0	0	0	0	0	0	0	Domain in histone families 1 and 5	GO:0003735	structural constituent of ribosome
EHS25_004484	0	0	0	0	0	0	0	1	0	0	0	0	0	0	0	0	0	0	Histone deacetylase	GO:0042802	identical protein binding
EHS25_004487	0	0	0	0	0	0	0	0	0	0	0	0	0	1	0	0	0	0	Belongs to the Glu Leu Phe Val dehydrogenases family	GO:0000166	nucleotide binding
EHS25_004488	0	0	0	0	0	0	0	0	0	1	1	1	0	0	0	0	0	0	Protein transport protein bet1	GO:0030173	integral component of Golgi membrane
EHS25_004498	0	0	0	0	0	0	0	0	0	0	0	0	0	1	0	0	0	0	EF-hand domain	GO:0016301	kinase activity
EHS25_004511	0	0	0	0	0	0	0	0	0	0	0	0	0	1	0	0	0	0	Myo-inositol-1-phosphate synthase	GO:0004512	inositol-3-phosphate synthase activity
EHS25_004536	0	0	1	0	0	0	0	0	0	0	0	0	0	0	0	0	0	0	Belongs to the DEAD box helicase family	GO:0140098	catalytic activity, acting on RNA
EHS25_004543	0	0	0	0	0	0	0	0	0	1	0	0	0	0	0	0	0	0	Ferredoxin-fold anticodon binding domain	GO:0005524	ATP binding
EHS25_004547	0	0	0	0	0	0	0	0	0	0	0	0	0	1	0	0	0	0	Retrograde transport, endosome to Golgi-related protein	GO:0005829	cytosol
EHS25_004555	0	0	0	0	0	0	0	0	0	1	0	1	0	0	0	0	0	0	Aminotransferase class I and II	GO:0008270	zinc ion binding
EHS25_004569	0	0	0	0	0	0	0	0	0	1	0	0	0	0	0	0	0	0	CDP-alcohol phosphatidyltransferase	GO:0016780	phosphotransferase activity, for other substituted phosphate groups
EHS25_004573	0	0	0	0	0	0	0	0	0	0	0	0	0	1	0	0	0	0	Vps51/Vps67	GO:0016020	membrane
EHS25_004597	0	0	0	0	0	0	0	1	1	0	0	0	0	0	0	0	0	0	Transcription factor PacC	GO:0046872	metal ion binding
EHS25_004599	0	0	0	0	0	0	0	1	0	0	0	0	0	0	0	0	0	0	WD40 associated region in TFIID subunit, NTD2 domain	GO:0005524	ATP binding
EHS25_004632	0	0	0	0	0	0	0	0	1	0	0	0	0	0	0	0	0	0	helix loop helix domain	GO:0003677	DNA binding
EHS25_004637	0	0	0	0	0	0	0	0	0	1	0	1	0	0	0	0	0	0	Minor histocompatibility antigen h13	GO:0004190	aspartic-type endopeptidase activity
EHS25_004647	0	0	0	0	0	0	0	0	0	0	1	0	0	0	0	0	0	0	Haemolysin-III related	GO:0022857	transmembrane transporter activity
EHS25_004649	0	0	0	0	0	0	0	0	0	0	0	0	0	1	0	0	0	0	Functions in the early steps of protein synthesis of a small number of specific mRNAs. Acts by directing the binding of methionyl-tRNAi to 40S ribosomal subunits. In contrast to the eIF- 2 complex, it binds methionyl-tRNAi to 40 S subunits in a codon- dependent manner, whereas the eIF-2 complex binds methionyl-tRNAi to 40 S subunits in a GTP-dependent manner. May act by impiging the expression of…	GO:0003729	mRNA binding
EHS25_004655	0	0	0	0	0	0	0	0	0	0	0	0	0	1	0	0	0	0	Conserved oligomeric complex COG6	GO:0000139	Golgi membrane
EHS25_004664	0	0	0	0	0	0	0	0	1	0	0	0	0	0	0	0	0	0	Mif2/CENP-C like	GO:0019237	centromeric DNA binding
EHS25_004672	0	0	0	1	0	1	0	0	0	0	0	0	0	0	0	0	0	0	Essential subunit of the N-oligosaccharyl transferase (OST) complex which catalyzes the transfer of a high mannose oligosaccharide from a lipid-linked oligosaccharide donor to an asparagine residue within an Asn-X-Ser Thr consensus motif in nascent polypeptide chains	GO:0016740	transferase activity
EHS25_004687	0	0	0	0	0	0	0	0	0	0	0	0	0	1	0	1	0	0	Guanylate kinase homologues.	GO:0016787	hydrolase activity
EHS25_004752	0	0	0	0	0	0	0	0	1	0	0	0	0	0	0	0	0	0	Major Facilitator Superfamily	GO:0016787	hydrolase activity
EHS25_004762	0	0	0	0	0	0	0	1	1	0	0	0	0	0	0	0	0	0	DNA binding	GO:0003677	DNA binding
EHS25_004782	0	0	0	0	0	0	0	1	1	0	0	0	0	0	0	0	0	0	GAL4-like Zn(II)2Cys6 (or C6 zinc) binuclear cluster DNA-binding domain	GO:0003677	DNA binding
EHS25_004784	0	0	0	0	0	0	0	1	1	0	0	0	0	0	0	0	0	0	GAL4-like Zn(II)2Cys6 (or C6 zinc) binuclear cluster DNA-binding domain	GO:0003677	DNA binding
EHS25_004795	0	0	1	0	0	0	0	0	0	0	0	0	0	0	0	0	0	0	GAL4-like Zn(II)2Cys6 (or C6 zinc) binuclear cluster DNA-binding domain	GO:0003677	DNA binding
EHS25_004855	0	0	0	0	0	0	0	1	0	0	0	0	0	0	0	0	0	0	DNA-binding transcription factor activity	GO:0003700	DNA-binding transcription factor activity
EHS25_004913	0	0	0	0	0	0	0	0	0	0	1	0	0	0	0	0	0	0	Sugar transporter	GO:0022857	transmembrane transporter activity
EHS25_004939	0	0	0	0	0	0	0	0	0	0	0	0	0	1	0	0	0	0	Alpha mannosidase, middle domain	GO:0046872	metal ion binding
EHS25_004945	0	0	0	0	0	0	0	0	0	0	1	0	0	0	0	0	0	0	Belongs to the ABC transporter superfamily. ABCG family. PDR (TC 3.A.1.205) subfamily	GO:0005524	ATP binding
EHS25_004965	0	0	0	0	0	0	0	0	0	0	0	0	0	1	0	0	0	0	Calcipressin	GO:0003676	nucleic acid binding
EHS25_004968	0	0	0	0	0	0	0	0	1	0	0	0	0	0	0	0	0	0	helix loop helix domain	GO:0003677	DNA binding
EHS25_004970	0	0	1	0	0	0	0	0	0	0	0	0	0	0	0	0	0	0	RNA polymerase Rpb5, N-terminal domain	GO:0005515	protein binding
EHS25_004973	0	0	0	0	0	0	0	0	0	0	0	0	0	1	0	0	0	0	EF-hand, calcium binding motif	GO:0016874	ligase activity
EHS25_004977	0	0	0	0	0	0	0	0	0	0	1	0	0	0	0	0	0	0	Belongs to the major facilitator superfamily. Sugar transporter (TC 2.A.1.1) family	GO:0022857	transmembrane transporter activity
EHS25_004996	0	0	0	0	0	0	0	0	0	1	1	0	0	0	0	0	0	0	Methylenetetrahydrofolate reductase	GO:0046872	metal ion binding
EHS25_005001	1	0	1	0	0	0	0	0	0	0	0	0	0	0	0	0	0	0	TAFII55 protein conserved region	GO:0003743	translation initiation factor activity
EHS25_005003	0	0	0	1	1	0	1	0	0	0	0	0	0	0	0	0	0	0	Ribosomal protein L9, N-terminal domain	GO:0003735	structural constituent of ribosome
EHS25_005006	0	0	0	0	0	0	0	0	0	1	0	0	0	0	0	0	0	0	Pet100	GO:0051082	unfolded protein binding
EHS25_005010	1	1	1	0	0	0	0	0	0	0	0	0	0	0	0	0	0	0	WD domain, G-beta repeat	GO:0034511	U3 snoRNA binding
EHS25_005011	0	0	0	0	0	0	0	0	0	1	0	0	0	0	0	0	0	0	d-3-phosphoglycerate dehydrogenase 2	GO:0016757	transferase activity, transferring glycosyl groups
EHS25_005021	0	0	0	0	0	0	0	0	1	0	0	0	0	0	0	0	0	0	DNA-binding domain of DNA mismatch repair MUTS family	GO:0019901	protein kinase binding
EHS25_005022	0	0	0	2	0	0	1	0	0	0	0	0	0	0	0	0	0	0	Ribosomal L27e protein family	GO:0003735	structural constituent of ribosome
EHS25_005025	0	0	0	2	0	0	1	0	0	0	0	0	0	0	0	0	0	0	Ribosomal L29 protein	GO:0003729	mRNA binding
EHS25_005026	1	0	1	0	0	0	0	0	0	0	0	0	0	0	0	0	0	0	XPC-binding domain	GO:0005509	calcium ion binding
EHS25_005027	0	0	0	0	0	0	0	1	1	0	0	0	0	0	0	0	0	0	Helicase conserved C-terminal domain	GO:0005525	GTP binding
EHS25_005028	1	0	0	0	0	0	0	0	0	0	0	0	0	0	0	0	0	0	Sof1-like domain	GO:0005730	nucleolus
EHS25_005032	0	0	0	0	0	0	0	0	0	0	0	0	0	1	0	0	0	0	Topoisomerase II-associated protein PAT1	GO:0003723	RNA binding
EHS25_005033	0	0	1	0	0	0	0	0	0	0	0	0	0	0	0	0	0	0	zinc ion binding	GO:0008270	zinc ion binding
EHS25_005041	0	0	0	0	1	0	1	0	0	0	0	0	0	0	0	0	0	0	Ribosomal L30 N-terminal domain	GO:0003735	structural constituent of ribosome
EHS25_005042	0	0	0	2	0	0	1	0	0	0	0	0	0	0	0	0	0	0	Belongs to the eukaryotic ribosomal protein P1 P2 family	GO:0043021	ribonucleoprotein complex binding
EHS25_005054	0	0	0	0	0	0	0	1	0	0	0	0	0	0	0	0	0	0	Protein tyrosine kinase	GO:0005524	ATP binding
EHS25_005060	0	0	0	0	0	0	0	1	0	0	0	0	0	0	0	0	0	0	Histone deacetylase domain	GO:0034979	NAD-dependent protein deacetylase activity
EHS25_005063	0	0	0	0	0	0	0	1	1	0	0	0	0	0	0	0	0	0	GAL4-like Zn(II)2Cys6 (or C6 zinc) binuclear cluster DNA-binding domain	GO:0008641	ubiquitin-like modifier activating enzyme activity
EHS25_005088	0	0	0	0	1	0	0	0	0	0	0	0	0	0	0	0	0	0	Ribulose-phosphate 3 epimerase family	GO:0005524	ATP binding
EHS25_005109	0	0	1	0	0	0	0	0	0	0	0	0	0	0	0	0	0	0	Serine/Threonine protein kinases, catalytic domain	GO:0005524	ATP binding
EHS25_005111	0	0	0	0	0	0	0	0	0	0	1	0	0	0	0	0	0	0	Potassium transport protein, high-affinity	GO:0015079	potassium ion transmembrane transporter activity
EHS25_005112	0	0	1	0	0	0	0	0	0	0	0	0	0	0	0	0	0	0	Gcd10p family	GO:0140101	catalytic activity, acting on a tRNA
EHS25_005139	0	0	1	0	0	0	0	0	0	0	0	0	0	0	0	0	0	0	Mitochondrial GTPase that catalyzes the GTP-dependent ribosomal translocation step during translation elongation. During this step, the ribosome changes from the pre-translocational (PRE) to the post-translocational (POST) state as the newly formed A- site-bound peptidyl-tRNA and P-site-bound deacylated tRNA move to the P and E sites, respectively. Catalyzes the coordinated movement of the two tR…	GO:0003735	structural constituent of ribosome
EHS25_005146	0	0	0	0	1	1	0	0	0	0	0	0	0	0	0	0	0	0	Low-density lipoprotein receptor domain class A	GO:0090599	alpha-glucosidase activity
EHS25_005159	0	0	0	0	1	1	0	0	0	0	0	0	0	0	0	0	0	0	May be involved in specific transport of UDP-Gal from the cytosol to the Golgi lumen. Involved in the maintenance of optimal conditions for the folding of secretory pathway proteins in the endoplasmic reticulum (By similarity)	GO:0005459	UDP-galactose transmembrane transporter activity
EHS25_005162	0	0	0	0	1	0	0	0	0	0	0	0	0	0	0	0	0	0	Belongs to the group II decarboxylase family	GO:0003723	RNA binding
EHS25_005170	0	0	0	0	0	0	0	0	0	0	0	0	0	1	0	0	0	0	Oxoglutarate and iron-dependent oxygenase degradation C-term	GO:0140096	catalytic activity, acting on a protein
EHS25_005173	1	0	0	0	0	0	0	0	0	0	0	0	0	0	0	0	0	0	Calcineurin-like phosphoesterase	GO:0005524	ATP binding
EHS25_005194	0	0	0	0	0	0	0	0	0	0	0	0	0	1	0	0	0	0	Isocitrate/isopropylmalate dehydrogenase	GO:0003723	RNA binding
EHS25_005210	0	0	0	0	0	0	0	0	0	0	0	0	0	1	0	0	0	0	Sigma factor PP2C-like phosphatases	GO:0046872	metal ion binding
EHS25_005223	0	0	0	0	0	0	0	0	0	1	0	0	0	0	0	0	0	0	Ribosomal protein L35	GO:0003735	structural constituent of ribosome
EHS25_005226	0	0	0	0	0	0	0	0	0	0	0	0	0	1	0	0	0	0	Actin	GO:0005515	protein binding
EHS25_005246	0	0	0	0	0	0	0	0	0	1	0	1	0	0	0	0	0	0	Belongs to the sterol desaturase family	GO:0016491	oxidoreductase activity
EHS25_005250	0	0	0	1	1	0	1	0	0	0	0	0	0	0	0	0	0	0	Belongs to the universal ribosomal protein uL16 family	GO:0003735	structural constituent of ribosome
EHS25_005271	0	0	1	0	0	0	0	0	0	0	0	0	0	0	0	0	0	0	Sister chromatid cohesion C-terminus	GO:0003682	chromatin binding
EHS25_005284	0	0	0	0	1	0	0	0	0	0	0	0	0	0	0	0	0	0	chitin synthase	GO:0005198	structural molecule activity
EHS25_005309	0	0	1	0	0	0	0	0	0	0	0	0	0	0	0	0	0	0	Poly(A) polymerase predicted RNA binding domain	GO:0005524	ATP binding
EHS25_005313	0	0	0	0	0	0	0	0	0	0	0	0	0	1	0	0	0	0	Component of the FACT complex, a general chromatin factor that acts to reorganize nucleosomes. The FACT complex is involved in multiple processes that require DNA as a template such as mRNA elongation, DNA replication and DNA repair. During transcription elongation the FACT complex acts as a histone chaperone that both destabilizes and restores nucleosomal structure. It facilitates the passage of…	GO:0042393	histone binding
EHS25_005343	0	0	0	0	0	0	0	0	1	0	0	0	0	0	0	0	0	0	D-isomer specific 2-hydroxyacid dehydrogenase, NAD binding domain	GO:0003677	DNA binding
EHS25_005354	0	0	1	0	0	0	0	0	0	0	0	0	0	0	0	0	0	0	Conserved mid region of cactin	GO:0045292	mRNA cis splicing, via spliceosome
EHS25_005360	1	1	1	0	0	0	0	0	0	0	0	0	0	0	0	0	0	0	rRNA processing-related protein	GO:0005730	nucleolus
EHS25_005361	0	0	0	0	0	0	0	0	0	0	0	0	0	1	0	0	0	0	Involved in the initiation of assembly of the COPII coat required for the formation of transport vesicles from the endoplasmic reticulum (ER) and the selection of cargo molecules. Also involved in autophagy	GO:0012507	ER to Golgi transport vesicle membrane
EHS25_005362	0	0	1	0	0	0	0	0	0	0	0	0	0	0	0	0	0	0	DNA-binding transcription factor activity	GO:0003700	DNA-binding transcription factor activity
EHS25_005366	0	0	0	0	0	0	0	0	0	0	0	0	0	1	0	0	0	0	Phosphoenolpyruvate phosphomutase	GO:0046872	metal ion binding
EHS25_005371	0	1	1	0	0	0	0	0	0	0	0	0	0	0	0	0	0	0	Sas10/Utp3/C1D family	GO:0003723	RNA binding
EHS25_005378	0	0	1	0	0	0	0	0	0	0	0	0	0	0	0	0	0	0	Fungal specific transcription factor domain	GO:0003677	DNA binding
EHS25_005392	0	0	0	0	0	0	0	0	0	0	0	0	0	1	0	1	0	0	Adenylate kinase, active site lid	GO:0003924	GTPase activity
EHS25_005401	0	0	0	0	0	0	0	1	1	0	0	0	0	0	0	0	0	0	GAL4-like Zn(II)2Cys6 (or C6 zinc) binuclear cluster DNA-binding domain	GO:0003677	DNA binding
EHS25_005410	0	0	0	0	0	0	0	1	1	0	0	0	0	0	0	0	0	0	Domain of unknown function (DUF4976)	GO:0003677	DNA binding
EHS25_005416	0	0	0	0	0	0	0	0	0	0	0	0	0	1	0	0	0	0	NAD( )-dependent glutamate dehydrogenase which degrades glutamate to ammonia and alpha-ketoglutarate	GO:0003676	nucleic acid binding
EHS25_005475	0	0	0	2	0	1	1	0	0	0	0	0	0	0	0	0	0	0	Glycolipid mannosyltransferase	GO:0003735	structural constituent of ribosome
EHS25_005476	0	0	1	0	0	0	0	0	0	0	0	0	0	0	0	0	0	0	Rrp44-like cold shock domain	GO:0020037	heme binding
EHS25_005491	0	0	0	0	0	0	0	0	0	0	0	0	0	1	0	0	0	0	Casein kinase substrate phosphoprotein PP28	GO:0016301	kinase activity
EHS25_005497	0	0	0	0	0	0	0	0	0	1	1	1	0	0	0	0	0	0	Belongs to the CDS family	GO:0005524	ATP binding
EHS25_005499	1	0	0	0	0	0	0	0	0	0	0	0	0	0	0	0	0	0	2OG-Fe(II) oxygenase superfamily	GO:0016491	oxidoreductase activity
EHS25_005501	0	0	0	0	0	0	0	0	0	0	0	0	0	1	0	1	0	0	Catalyzes the transfer of a two-carbon ketol group from a ketose donor to an aldose acceptor, via a covalent intermediate with the cofactor thiamine pyrophosphate	GO:0005515	protein binding
EHS25_005539	0	0	0	0	0	0	0	1	0	0	0	0	0	0	0	0	0	0	DNA-binding transcription factor activity	GO:0003700	DNA-binding transcription factor activity
EHS25_005588	0	0	0	0	0	0	0	1	1	0	0	0	0	0	0	0	0	0	ATP binding	GO:0005524	ATP binding
EHS25_005590	0	0	0	0	0	0	0	1	1	0	0	0	0	0	0	0	0	0	GAL4-like Zn(II)2Cys6 (or C6 zinc) binuclear cluster DNA-binding domain	GO:0003677	DNA binding
EHS25_005596	1	0	0	0	0	0	0	0	0	0	0	0	0	0	0	0	0	0	helix loop helix domain	GO:0003677	DNA binding
EHS25_005599	0	0	0	0	0	0	0	1	1	0	0	0	0	0	0	0	0	0	heat shock factor	GO:0016301	kinase activity
EHS25_005615	0	0	0	0	0	0	0	0	1	0	0	0	0	0	0	0	0	0	Gti1/Pac2 family	GO:0003677	DNA binding
EHS25_005666	0	0	0	0	0	0	0	1	1	0	0	0	0	0	0	0	0	0	pathway-specific nitrogen regulator	GO:0000981	DNA-binding transcription factor activity, RNA polymerase II-specific
EHS25_005697	0	0	0	0	0	0	0	0	0	1	1	0	0	0	0	0	0	0	Cytochrome c oxidase is the component of the respiratory chain that catalyzes the reduction of oxygen to water. Subunits 1- 3 form the functional core of the enzyme complex. CO I is the catalytic subunit of the enzyme. Electrons originating in cytochrome c are transferred via the copper A center of subunit 2 and heme A of subunit 1 to the bimetallic center formed by heme A3 and copper B	GO:0003677	DNA binding
EHS25_005719	0	0	0	0	0	0	0	1	0	0	0	0	0	0	0	0	0	0	Fungal specific transcription factor domain	GO:0008081	phosphoric diester hydrolase activity
EHS25_005743	0	0	0	0	0	0	0	0	1	0	0	0	0	0	0	0	0	0	Component of the ubiquinol-cytochrome c reductase complex (complex III or cytochrome b-c1 complex) that is part of the mitochondrial respiratory chain. The b-c1 complex mediates electron transfer from ubiquinol to cytochrome c. Contributes to the generation of a proton gradient across the mitochondrial membrane that is then used for ATP synthesis	GO:0003677	DNA binding
EHS25_005766	0	0	0	0	0	0	0	0	1	0	0	0	0	0	0	0	0	0	Copper amine oxidase	GO:0003677	DNA binding
EHS25_005778	0	0	0	0	0	0	0	0	0	1	1	0	0	0	0	0	0	0	Involved in biosynthesis of the thiamine precursor thiazole. Catalyzes the conversion of NAD and glycine to adenosine diphosphate 5-(2-hydroxyethyl)-4-methylthiazole-2-carboxylic acid (ADT), an adenylated thiazole intermediate. The reaction includes an iron-dependent sulfide transfer from a conserved cysteine residue of the protein to a thiazole intermediate. The enzyme can only undergo a single …	GO:0005381	iron ion transmembrane transporter activity
EHS25_005836	0	0	0	0	0	0	0	0	0	0	1	0	0	0	0	0	0	0	Belongs to the major facilitator superfamily. Sugar transporter (TC 2.A.1.1) family	GO:0022857	transmembrane transporter activity
EHS25_005859	0	0	0	0	0	0	0	1	1	0	0	0	0	0	0	0	0	0	Carbon-nitrogen hydrolase	GO:0003677	DNA binding
EHS25_005879	0	0	0	0	0	0	0	1	0	0	0	0	0	0	0	0	0	0	Fungal specific transcription factor domain	GO:0008270	zinc ion binding
EHS25_005883	0	0	0	0	0	0	0	0	0	0	0	0	0	1	0	0	0	0	Belongs to the class-III pyridoxal-phosphate-dependent aminotransferase family	GO:0030170	pyridoxal phosphate binding
EHS25_005924	0	0	0	0	0	0	0	0	0	0	0	0	0	1	1	0	0	0	ESSS subunit of NADH:ubiquinone oxidoreductase (complex I)	GO:0046872	metal ion binding
EHS25_005927	0	0	0	0	0	0	0	1	1	0	0	0	0	0	0	0	0	0	Transcriptional Coactivator p15 (PC4)	GO:0003713	transcription coactivator activity
EHS25_005943	0	0	0	0	1	1	0	0	0	0	0	0	0	0	0	0	0	0	Methyltransferase required for the conversion of 2- polyprenyl-6-methoxy-1,4-benzoquinol (DDMQH2) to 2-polyprenyl-3- methyl-6-methoxy-1,4-benzoquinol (DMQH2)	GO:0046872	metal ion binding
EHS25_005944	0	0	0	0	0	0	0	0	0	1	1	1	0	0	0	0	0	0	SecE/Sec61-gamma subunits of protein translocation complex	GO:0015450	P-P-bond-hydrolysis-driven protein transmembrane transporter activity
EHS25_005946	0	0	1	0	0	0	0	0	0	0	0	0	0	0	0	0	0	0	U1 snRNP 70K protein (Short form)	GO:0030619	U1 snRNA binding
EHS25_005958	0	0	1	0	0	0	0	0	0	0	0	0	0	0	0	0	0	0	PHD-finger	GO:0000977	RNA polymerase II transcription regulatory region sequence-specific DNA binding
EHS25_005963	0	0	0	0	0	0	0	0	0	0	0	0	0	1	0	0	0	0	NADH pyrophosphatase-like rudimentary NUDIX domain	GO:0046872	metal ion binding
EHS25_005972	0	0	0	0	0	0	0	0	0	1	1	0	0	0	0	0	0	0	Adaptins are components of the adaptor complexes which link clathrin to receptors in coated vesicles. Clathrin-associated protein complexes are believed to interact with the cytoplasmic tails of membrane proteins, leading to their selection and concentration	GO:0016491	oxidoreductase activity
EHS25_005990	1	0	1	0	0	0	0	0	0	0	0	0	0	0	0	0	0	0	DNA-dependent RNA polymerase catalyzes the transcription of DNA into RNA using the four ribonucleoside triphosphates as substrates	GO:0008233	peptidase activity
EHS25_005992	0	0	0	1	0	0	0	0	0	0	0	0	0	0	0	0	0	0	Mitochondrial carrier protein	GO:0004553	hydrolase activity, hydrolyzing O-glycosyl compounds
EHS25_005993	0	0	0	0	1	0	0	0	0	0	0	0	0	0	0	0	0	0	pyruvate dehydrogenase protein x component, mitochondrial	GO:0005198	structural molecule activity
EHS25_005995	0	0	0	0	0	0	0	0	0	0	0	0	0	1	0	0	0	0	Insulinase (Peptidase family M16)	GO:0004563	beta-N-acetylhexosaminidase activity
EHS25_006004	0	0	0	0	1	1	0	0	0	0	0	0	0	0	0	0	0	0	PPIases accelerate the folding of proteins. It catalyzes the cis-trans isomerization of proline imidic peptide bonds in oligopeptides	GO:0003723	RNA binding
EHS25_006020	0	0	0	0	0	0	0	0	0	0	0	0	0	1	0	1	0	0	GMP synthase C terminal domain	GO:0016740	transferase activity
EHS25_006032	0	0	0	0	0	0	0	0	0	0	0	0	0	0	0	0	1	0	Belongs to the glycosyl hydrolase 28 family	GO:0004650	polygalacturonase activity
EHS25_006046	0	0	0	0	0	0	0	0	0	0	0	0	0	1	0	1	0	0	Succinyl-CoA synthetase functions in the citric acid cycle (TCA), coupling the hydrolysis of succinyl-CoA to the synthesis of ATP and thus represents the only step of substrate- level phosphorylation in the TCA. The beta subunit provides nucleotide specificity of the enzyme and binds the substrate succinate, while the binding sites for coenzyme A and phosphate are found in the alpha subunit	GO:0003735	structural constituent of ribosome
EHS25_006053	0	0	0	0	0	0	0	0	0	1	0	0	0	0	0	0	0	0	Aminotransferase class I and II	GO:0016740	transferase activity
EHS25_006078	0	0	0	0	1	0	0	0	0	0	0	0	0	0	0	0	0	0	3' exoribonuclease family, domain 1	GO:0004527	exonuclease activity
EHS25_006092	0	0	0	1	1	0	1	0	0	0	0	0	0	0	0	0	0	0	oxidoreductase activity	GO:0016491	oxidoreductase activity
EHS25_006096	0	0	0	2	0	0	1	0	0	0	0	0	0	0	0	0	0	0	Ribosomal protein L34e	GO:0003735	structural constituent of ribosome
EHS25_006109	0	0	0	0	0	0	0	0	0	0	0	0	0	1	0	0	0	0	Belongs to the ubiquitin-conjugating enzyme family	GO:0008324	cation transmembrane transporter activity
EHS25_006131	0	0	0	0	0	0	0	0	0	0	0	0	0	1	0	0	0	0	Alcohol dehydrogenase GroES-like domain	GO:0005515	protein binding
EHS25_006138	0	0	0	0	0	0	0	0	0	0	1	0	0	0	0	0	0	0	GDP-mannose 4,6 dehydratase	GO:0003676	nucleic acid binding
EHS25_006141	0	0	0	0	0	0	0	0	0	1	1	0	0	0	0	0	0	0	Triose-phosphate Transporter family	GO:0015297	antiporter activity
EHS25_006146	0	0	1	0	0	0	0	0	0	0	0	0	0	0	0	0	0	0	Histone H3	GO:0005524	ATP binding
EHS25_006153	0	0	0	0	0	0	0	0	0	1	0	0	0	0	0	0	0	0	prohibitin homologues	GO:0008080	N-acetyltransferase activity
EHS25_006164	0	0	1	0	0	0	0	0	0	0	0	0	0	0	0	0	0	0	Methionine-tRNA ligase	GO:0046983	protein dimerization activity
EHS25_006165	0	0	0	0	0	0	0	0	0	1	0	0	0	0	0	0	0	0	prohibitin homologues	GO:0005524	ATP binding
EHS25_006175	0	0	0	0	0	0	0	1	0	0	0	0	0	0	0	0	0	0	Ppx/GppA phosphatase family	GO:0051219	phosphoprotein binding
EHS25_006181	0	0	0	0	0	0	0	0	0	0	0	0	0	1	0	0	0	0	Elongation factor G C-terminus	GO:0043022	ribosome binding
EHS25_006182	0	0	0	0	0	0	0	0	0	1	0	0	0	0	0	0	0	0	Fructose-1-6-bisphosphatase, N-terminal domain	GO:0046872	metal ion binding
EHS25_006196	0	0	0	0	0	0	0	0	0	0	0	0	0	0	1	0	0	0	Proteasome regulatory subunit C-terminal	GO:0030234	enzyme regulator activity
EHS25_006197	0	0	0	1	0	1	0	0	0	0	0	0	0	0	0	0	0	0	Endoplasmic reticulum protein ERp29, C-terminal domain	GO:0140096	catalytic activity, acting on a protein
EHS25_006202	1	1	1	0	0	0	0	0	0	0	0	0	0	0	0	0	0	0	snRNP Sm proteins	GO:0005515	protein binding
EHS25_006211	0	0	0	1	1	0	1	0	0	0	0	0	0	0	0	0	0	0	Belongs to the universal ribosomal protein uS3 family	GO:0016747	transferase activity, transferring acyl groups other than amino-acyl groups
EHS25_006229	0	0	0	0	0	0	0	0	0	0	0	0	0	1	0	1	0	0	Phosphoglycerate kinase	GO:0046872	metal ion binding
EHS25_006233	0	0	0	0	0	0	0	1	1	0	0	0	0	0	0	0	0	0	heat shock factor	GO:0016301	kinase activity
EHS25_006238	0	0	0	0	0	0	0	1	1	0	0	0	0	0	0	0	0	0	c6 finger domain protein	GO:0001067	regulatory region nucleic acid binding
EHS25_006256	0	0	0	0	0	0	0	0	0	0	0	0	0	1	0	0	0	0	Taurine catabolism dioxygenase TauD, TfdA family	GO:0016491	oxidoreductase activity
EHS25_006263	0	0	0	0	0	0	0	1	0	0	0	0	0	0	0	0	0	0	OPT oligopeptide transporter protein	GO:0008270	zinc ion binding
EHS25_006265	0	0	0	0	0	0	0	1	1	0	0	0	0	0	0	0	0	0	Domain of unknown function (DUF4387)	GO:0016829	lyase activity
EHS25_006269	0	0	1	0	0	0	0	0	0	0	0	0	0	0	0	0	0	0	RNA 2'-phosphotransferase, Tpt1 / KptA family	GO:0016301	kinase activity
EHS25_006271	0	0	0	0	0	0	0	0	0	0	0	0	0	1	0	0	0	0	TATA box binding protein associated factor	GO:0003713	transcription coactivator activity
EHS25_006278	0	0	0	2	0	1	0	0	0	0	0	0	0	0	0	0	0	0	Catalyzes the third of the four reactions of the long- chain fatty acids elongation cycle. This endoplasmic reticulum- bound enzymatic process, allows the addition of two carbons to the chain of long- and very long-chain fatty acids VLCFAs per cycle. This enzyme catalyzes the dehydration of the 3-hydroxyacyl-CoA intermediate into trans-2,3-enoyl-CoA, within each cycle of fatty acid elongation. Th…	GO:0004300	enoyl-CoA hydratase activity
EHS25_006279	0	0	0	1	0	0	0	0	0	0	0	0	0	0	0	0	0	0	ATP synthase	GO:0016887	ATPase activity
EHS25_006287	0	0	0	0	1	0	0	0	0	0	0	0	0	0	0	0	0	0	Inorganic pyrophosphatase	GO:0043015	gamma-tubulin binding
EHS25_006298	0	0	0	0	0	0	0	0	0	0	0	0	0	1	0	0	0	0	26S proteasome subunit RPN7	GO:0005737	cytoplasm
EHS25_006312	0	0	0	1	0	1	0	0	0	0	0	0	0	0	0	0	0	0	Calreticulin family	GO:0030246	carbohydrate binding
EHS25_006322	0	0	0	0	0	0	0	0	0	0	0	0	0	1	0	0	0	0	Serine aminopeptidase, S33	GO:0042171	lysophosphatidic acid acyltransferase activity
EHS25_006325	0	0	0	0	0	0	0	0	0	1	1	1	0	0	0	0	0	0	Glutathione peroxidase	GO:0008519	ammonium transmembrane transporter activity
EHS25_006328	0	0	0	0	0	0	0	1	0	0	0	0	0	0	0	0	0	0	BFD-like [2Fe-2S] binding domain	GO:0000981	DNA-binding transcription factor activity, RNA polymerase II-specific
EHS25_006331	0	0	0	0	0	0	0	0	1	0	0	0	0	0	0	0	0	0	DNA repair protein rad16	GO:0003684	damaged DNA binding
EHS25_006341	0	0	0	0	0	0	0	0	0	0	1	0	0	0	0	0	0	0	HEAT-like repeat	GO:0005347	ATP transmembrane transporter activity
EHS25_006344	0	0	0	0	0	0	0	0	0	0	0	0	0	1	0	0	0	0	GTPase activating protein	GO:0008092	cytoskeletal protein binding
EHS25_006364	1	0	0	0	0	0	0	0	0	0	0	0	0	0	0	0	0	0	Fumarylacetoacetate (FAA) hydrolase family	GO:0016853	isomerase activity
EHS25_006372	0	0	0	0	0	0	0	0	0	0	0	0	0	0	0	1	0	0	This enzyme condenses acetyl-CoA with acetoacetyl-CoA to form HMG-CoA, which is the substrate for HMG-CoA reductase	GO:0004421	hydroxymethylglutaryl-CoA synthase activity
EHS25_006379	0	0	1	0	0	0	0	0	0	0	0	0	0	0	0	0	0	0	cwf21	GO:0005737	cytoplasm
EHS25_006383	0	0	0	0	0	0	0	0	0	0	0	0	0	1	0	0	0	0	to TIGR gene model, INSD accession	GO:0022857	transmembrane transporter activity
EHS25_006384	0	0	0	0	0	0	0	0	0	0	0	0	0	1	0	0	0	0	2OG-Fe(II) oxygenase superfamily	GO:0140096	catalytic activity, acting on a protein
EHS25_006402	0	0	1	0	0	0	0	0	0	0	0	0	0	0	0	0	0	0	Aft1 HRA domain	GO:0003700	DNA-binding transcription factor activity
EHS25_006433	0	0	0	0	0	0	0	0	0	0	0	0	0	1	0	0	0	0	coatomer protein	GO:0000139	Golgi membrane
EHS25_006437	0	0	0	2	0	0	1	0	0	0	0	0	0	0	0	0	0	0	Ribosomal L28e protein family	GO:0003735	structural constituent of ribosome
EHS25_006439	0	0	0	0	0	0	0	0	0	0	0	0	0	1	0	0	0	0	The coatomer is a cytosolic protein complex that binds to dilysine motifs and reversibly associates with Golgi non- clathrin-coated vesicles, which further mediate biosynthetic protein transport from the ER, via the Golgi up to the trans Golgi network. Coatomer complex is required for budding from Golgi membranes, and is essential for the retrograde Golgi-to-ER transport of dilysine-tagged protei…	GO:0003824	catalytic activity
EHS25_006441	0	0	1	0	0	0	0	0	0	0	0	0	0	0	0	0	0	0	DNA binding	GO:0003677	DNA binding
EHS25_006447	0	0	0	0	0	0	0	0	0	0	0	0	0	1	1	0	0	0	proteasome subunit	GO:0005524	ATP binding
EHS25_006448	1	1	0	0	0	0	0	0	0	0	0	0	0	0	0	0	0	0	Required for proper 27S pre-rRNA processing and 60S ribosome subunit assembly	GO:0003723	RNA binding
EHS25_006449	0	0	0	0	0	0	0	0	0	0	0	0	0	1	0	0	0	0	O-methyltransferase that catalyzes the 2 O-methylation steps in the ubiquinone biosynthetic pathway	GO:0003735	structural constituent of ribosome
EHS25_006458	0	0	0	0	1	1	0	0	0	0	0	0	0	0	0	0	0	0	Dolichyl-diphosphooligosaccharide-protein glycotransferase	GO:0016740	transferase activity
EHS25_006465	0	0	0	0	0	0	0	0	0	0	0	0	0	1	0	0	0	0	Scaffold protein for the de novo synthesis of iron- sulfur (Fe-S) clusters within mitochondria, which is required for maturation of both mitochondrial and cytoplasmic 2Fe-2S and 4Fe-4S proteins	GO:0051539	4 iron, 4 sulfur cluster binding
EHS25_006471	0	0	0	0	0	0	0	0	0	0	0	0	0	0	0	0	1	0	Belongs to the glycosyl hydrolase 43 family	GO:0004553	hydrolase activity, hydrolyzing O-glycosyl compounds
EHS25_006473	0	1	1	0	0	0	0	0	0	0	0	0	0	0	0	0	0	0	U3 small nucleolar RNA-associated protein 6	GO:0030515	snoRNA binding
EHS25_006482	0	0	0	0	0	0	0	0	0	1	0	0	0	0	0	0	0	0	Translation initiation factor SUI1	GO:0043024	ribosomal small subunit binding
EHS25_006492	0	0	0	0	0	0	0	1	1	0	0	0	0	0	0	0	0	0	GAL4-like Zn(II)2Cys6 (or C6 zinc) binuclear cluster DNA-binding domain	GO:0016810	hydrolase activity, acting on carbon-nitrogen (but not peptide) bonds
EHS25_006503	0	0	0	0	0	0	0	0	0	0	0	0	0	1	0	0	0	0	SelR domain	GO:0070191	methionine-R-sulfoxide reductase activity
EHS25_006508	0	0	0	0	0	0	0	0	0	0	0	0	0	1	0	0	0	0	Belongs to the MCM family	GO:0003697	single-stranded DNA binding
EHS25_006526	0	0	0	0	0	0	0	0	0	0	0	0	0	1	0	0	0	0	Belongs to the GDA1 CD39 NTPase family	GO:0015095	magnesium ion transmembrane transporter activity
EHS25_006531	0	0	0	0	0	0	0	1	0	0	0	0	0	0	0	0	0	0	RNA recognition motif	GO:0003723	RNA binding
EHS25_006532	0	0	0	1	1	0	1	0	0	0	0	0	0	0	0	0	0	0	Belongs to the eukaryotic ribosomal protein eS1 family	GO:0003729	mRNA binding
EHS25_006539	0	0	0	0	1	0	0	0	0	0	0	0	0	0	0	0	0	0	Glutaredoxin	GO:0015038	glutathione disulfide oxidoreductase activity
EHS25_006541	0	0	0	0	0	0	0	0	0	0	0	0	0	1	0	0	0	0	Rhodanese-like protein	GO:0016740	transferase activity
EHS25_006552	0	0	0	0	0	0	0	0	0	0	0	0	0	1	0	0	0	0	Cys/Met metabolism PLP-dependent enzyme	GO:0005525	GTP binding
EHS25_006554	0	0	0	0	0	0	0	0	0	0	0	0	0	1	0	0	0	0	WD domain, G-beta repeat	GO:0003824	catalytic activity
EHS25_006560	0	0	0	0	0	0	0	1	1	0	0	0	0	0	0	0	0	0	Protein of unknown function (DUF3140)	GO:0003677	DNA binding
EHS25_006566	0	0	0	0	0	0	0	0	0	0	0	0	0	1	1	0	0	0	Proteasome subunit A N-terminal signature Add an annotation	GO:0004721	phosphoprotein phosphatase activity
EHS25_006571	0	0	0	0	0	0	0	0	0	0	0	0	0	1	0	1	0	0	Mitochondrial membrane ATP synthase (F(1)F(0) ATP synthase or Complex V) produces ATP from ADP in the presence of a proton gradient across the membrane which is generated by electron transport complexes of the respiratory chain. F-type ATPases consist of two structural domains, F(1) - containing the extramembraneous catalytic core, and F(0) - containing the membrane proton channel, linked togethe…	GO:0016787	hydrolase activity
EHS25_006573	0	0	0	0	0	0	0	0	0	0	0	0	0	0	1	0	0	0	motif in proteasome subunits, Int-6, Nip-1 and TRIP-15	GO:0000502	proteasome complex
EHS25_006580	0	0	0	0	0	0	0	0	0	0	0	0	0	1	0	0	0	0	racemase and epimerase activity, acting on carbohydrates and derivatives	GO:0003735	structural constituent of ribosome
EHS25_006581	0	0	0	0	0	0	0	0	0	0	0	0	0	1	0	0	0	0	Galactokinase galactose-binding signature	GO:0005524	ATP binding
EHS25_006584	0	0	0	0	0	0	0	0	1	0	0	0	0	0	0	0	0	0	minichromosome maintenance proteins	GO:0022857	transmembrane transporter activity
EHS25_006588	0	0	0	0	0	0	0	0	0	0	0	0	0	1	0	0	0	0	ERAP1-like C-terminal domain	GO:0042277	peptide binding
EHS25_006591	0	0	0	0	0	0	0	0	0	1	0	0	0	0	0	0	0	0	Ribosomal L37ae protein family	GO:0046872	metal ion binding
EHS25_006596	0	0	0	0	0	0	0	1	0	0	0	0	0	0	0	0	0	0	basic region leucin zipper	GO:0003700	DNA-binding transcription factor activity
EHS25_006609	0	0	0	0	0	0	0	0	0	1	1	0	0	0	0	0	0	0	mitochondrial import receptor subunit tom40	GO:0008320	protein transmembrane transporter activity
EHS25_006617	1	0	0	0	0	0	0	0	0	0	0	0	0	0	0	0	0	0	Removes the N-terminal methionine from nascent proteins. The N-terminal methionine is often cleaved when the second residue in the primary sequence is small and uncharged (Met-Ala-, Cys, Gly, Pro, Ser, Thr, or Val)	GO:0022857	transmembrane transporter activity
EHS25_006624	0	0	0	1	0	0	0	0	0	0	0	0	0	0	0	0	0	0	Carbon utilization by utilization of organic compounds-related protein	GO:0031970	organelle envelope lumen
EHS25_006628	0	0	0	0	1	0	0	0	0	0	0	0	0	0	0	0	0	0	Belongs to the GPI family	GO:0016491	oxidoreductase activity
EHS25_006630	0	0	0	0	0	0	0	0	1	0	0	0	0	0	0	0	0	0	ERCC4 domain	GO:0022857	transmembrane transporter activity
EHS25_006639	0	0	0	1	0	0	0	0	0	0	0	0	0	0	0	0	0	0	Belongs to the AAA ATPase family	GO:0042802	identical protein binding
EHS25_006647	1	1	1	0	0	0	0	0	0	0	0	0	0	0	0	0	0	0	Component of the NOP7 complex, which is required for maturation of the 25S and 5.8S ribosomal RNAs and formation of the 60S ribosome	GO:0046872	metal ion binding
EHS25_006661	0	0	0	0	0	0	0	0	0	0	0	0	0	1	0	0	0	0	Phosphoadenosine phosphosulfate reductase family	GO:0016740	transferase activity
EHS25_006683	0	0	0	0	0	0	0	0	0	0	0	0	0	1	0	0	0	0	Dual specificity phosphatase, catalytic domain	GO:0016301	kinase activity
EHS25_006694	0	0	0	0	0	0	0	0	0	1	1	1	1	0	0	0	0	0	Mannosyltransferase (PIG-M)	GO:0017176	phosphatidylinositol N-acetylglucosaminyltransferase activity
EHS25_006697	0	0	1	0	0	0	0	0	0	0	0	0	0	0	0	0	0	0	Pre-mRNA-splicing factor of RES complex	GO:0045735	nutrient reservoir activity
EHS25_006711	0	0	0	0	0	0	0	0	0	0	0	0	0	1	0	1	0	0	Hexokinase	GO:0005524	ATP binding
EHS25_006721	0	0	1	0	0	0	0	0	0	0	0	0	0	0	0	0	0	0	RNA polymerase III transcription factor (TF)IIIC subunit	GO:0000127	transcription factor TFIIIC complex
EHS25_006726	0	0	0	0	0	0	0	0	0	0	0	0	0	1	0	0	0	0	Protein tyrosine kinase	GO:0045145	single-stranded DNA 5'-3' exodeoxyribonuclease activity
EHS25_006732	0	0	0	0	0	0	0	0	1	0	0	0	0	0	0	0	0	0	SWIM zinc finger	GO:0003677	DNA binding
EHS25_006735	0	0	0	0	0	0	0	1	1	0	0	0	0	0	0	0	0	0	GAL4-like Zn(II)2Cys6 (or C6 zinc) binuclear cluster DNA-binding domain	GO:0003677	DNA binding
EHS25_006741	0	0	0	0	0	0	0	0	0	0	0	0	1	0	0	0	0	0	Glycolipid 2-alpha-mannosyltransferase	GO:0000030	mannosyltransferase activity
EHS25_006763	0	0	0	0	0	0	0	0	0	1	1	0	0	0	0	0	0	0	Component of the ribosome assembly machinery. Nuclear paralog of the ribosomal protein P0, it binds pre-60S subunits at an early stage of assembly in the nucleolus, and is replaced by P0 in cytoplasmic pre-60S subunits and mature 80S ribosomes	GO:0016021	integral component of membrane
EHS25_006767	0	0	0	0	0	0	0	1	1	0	0	0	0	0	0	0	0	0	Fungal specific transcription factor domain	GO:0003677	DNA binding
EHS25_006785	0	0	0	0	0	0	0	0	0	0	0	0	0	1	0	0	0	0	Fibrillarin	GO:0016859	cis-trans isomerase activity
EHS25_006786	0	0	0	1	0	0	0	0	0	0	0	0	0	0	0	0	0	0	C-terminal domain of 1-Cys peroxiredoxin	GO:0004601	peroxidase activity
EHS25_006793	0	0	1	0	0	0	0	0	0	0	0	0	0	0	0	0	0	0	Dcp2, box A domain	GO:0016787	hydrolase activity
EHS25_006796	1	0	1	0	0	0	0	0	0	0	0	0	0	0	0	0	0	0	Putative RNA methylase family UPF0020	GO:0008233	peptidase activity
EHS25_006808	0	0	0	0	0	0	0	0	0	0	0	0	0	1	0	0	0	0	Ras of Complex, Roc, domain of DAPkinase	GO:0005525	GTP binding
EHS25_006822	0	0	0	0	0	0	0	0	1	0	0	0	0	0	0	0	0	0	BRCT domain, a BRCA1 C-terminus domain	GO:0046872	metal ion binding
EHS25_006829	0	0	0	0	0	0	0	0	0	1	0	0	0	0	0	0	0	0	FAD binding domain	GO:0016491	oxidoreductase activity
EHS25_006841	0	0	0	0	0	0	0	0	0	0	0	0	0	1	0	1	0	0	Metalloenzyme superfamily	GO:0005524	ATP binding
EHS25_006842	0	0	0	0	0	0	0	0	0	0	0	0	0	0	1	0	0	0	26S proteasome subunit RPN7	GO:0016301	kinase activity
EHS25_006847	0	0	0	0	0	0	0	0	1	0	0	0	0	0	0	0	0	0	DNA polymerase type-B family	GO:0097367	carbohydrate derivative binding
EHS25_006860	0	0	0	0	0	0	0	0	0	0	0	0	0	1	0	0	0	0	Muniscin C-terminal mu homology domain	GO:0008092	cytoskeletal protein binding
EHS25_006872	0	0	0	0	0	0	0	0	0	0	0	0	0	1	0	1	0	0	Catalyzes the oxidative decarboxylation of 6- phosphogluconate to ribulose 5-phosphate and CO(2), with concomitant reduction of NADP to NADPH	GO:0016853	isomerase activity
EHS25_006875	0	0	0	0	0	0	0	0	0	0	0	0	0	1	0	0	0	0	Catalyzes the interconversion between the alpha and beta anomers from at least three hexose 6-phosphate sugars (Glc6P, Gal6P, and Man6P)	GO:0046872	metal ion binding
EHS25_006885	0	1	1	0	0	0	0	0	0	0	0	0	0	0	0	0	0	0	Ribosome biogenesis protein Nop16	GO:0043232	intracellular non-membrane-bounded organelle
EHS25_006892	0	0	0	0	0	0	0	0	0	0	1	0	0	0	0	0	0	0	Cornichon protein	GO:0016021	integral component of membrane
EHS25_006911	0	0	0	0	0	0	0	1	0	0	0	0	0	0	0	0	0	0	Belongs to the TRAFAC class myosin-kinesin ATPase superfamily. Kinesin family	GO:0003676	nucleic acid binding
EHS25_006933	0	0	0	0	0	0	0	0	0	1	0	0	1	0	0	0	0	0	Glycosyl transferases group 1	GO:0003677	DNA binding
EHS25_006938	0	0	0	0	0	0	0	0	0	1	1	0	0	0	0	0	0	0	Glycosyl hydrolase family 47	GO:0016491	oxidoreductase activity
EHS25_006950	0	0	0	0	0	0	0	0	1	0	0	0	0	0	0	0	0	0	DNA mismatch repair protein Mlh1 C-terminus	GO:0005524	ATP binding
EHS25_006955	0	0	0	0	0	0	0	0	0	0	0	0	0	1	0	0	0	0	Belongs to the universal ribosomal protein uL22 family	GO:0003735	structural constituent of ribosome
EHS25_006975	0	0	0	0	0	0	0	1	1	0	0	0	0	0	0	0	0	0	to TIGR gene model, INSD accession	GO:0003677	DNA binding
EHS25_007039	0	0	0	0	0	0	0	0	0	0	0	0	0	0	0	0	1	0	Bacterial alpha-L-rhamnosidase C-terminal domain	GO:0003676	nucleic acid binding
EHS25_007063	0	0	0	0	0	0	0	0	0	0	0	0	0	1	0	0	0	0	participates in several chromatin remodeling complexes, including the SWR1 and the INO80 complexes	GO:0046982	protein heterodimerization activity
EHS25_007066	0	0	0	0	0	0	0	0	1	0	0	0	0	0	0	0	0	0	Dyggve-Melchior-Clausen syndrome protein	GO:0005524	ATP binding
EHS25_007077	0	0	0	1	1	0	1	0	0	0	0	0	0	0	0	0	0	0	Ribosomal protein L6	GO:0003735	structural constituent of ribosome
EHS25_007079	0	0	0	0	0	0	0	0	0	0	0	0	0	1	0	0	0	0	This magnesium-dependent enzyme catalyzes the hydrolysis of ATP coupled with the transport of calcium	GO:0016787	hydrolase activity
EHS25_007085	0	0	0	0	1	0	0	0	0	0	0	0	0	0	0	0	0	0	Ctr copper transporter family	GO:0016301	kinase activity
EHS25_007094	0	0	1	0	0	0	0	0	0	0	0	0	0	0	0	0	0	0	Fungal specific transcription factor domain	GO:0003677	DNA binding
EHS25_007102	0	0	0	0	1	0	0	0	0	0	0	0	0	0	0	0	0	0	calcium ion transporter	GO:0015369	calcium:proton antiporter activity
EHS25_007109	0	0	0	0	0	0	0	0	0	0	0	0	0	0	0	0	1	0	Belongs to the glycosyl hydrolase 1 family	GO:0004553	hydrolase activity, hydrolyzing O-glycosyl compounds
EHS25_007115	0	0	0	0	0	0	0	0	0	0	1	0	0	0	0	0	0	0	Amino acid permease	GO:0046943	carboxylic acid transmembrane transporter activity
EHS25_007137	0	0	0	0	0	0	0	1	1	0	0	0	0	0	0	0	0	0	Fungal specific transcription factor domain	GO:0016787	hydrolase activity
EHS25_007150	0	0	0	0	0	0	0	1	0	0	0	0	0	0	0	0	0	0	basic region leucin zipper	GO:0003700	DNA-binding transcription factor activity
EHS25_007228	0	0	0	0	0	0	0	0	0	0	0	0	0	1	0	0	0	0	Cytidine and deoxycytidylate deaminase zinc-binding region	GO:0005524	ATP binding
EHS25_007247	0	0	0	1	0	0	0	0	0	0	0	0	0	0	0	0	0	0	ATP-NAD kinase	GO:0042736	NADH kinase activity
EHS25_007248	0	0	0	0	0	0	0	0	0	0	0	0	0	1	0	0	0	0	Beta-eliminating lyase	GO:0016740	transferase activity
EHS25_007251	0	0	0	0	0	0	0	0	1	0	0	0	0	0	0	0	0	0	Alpha-L-rhamnosidase	GO:0016614	oxidoreductase activity, acting on CH-OH group of donors
EHS25_007253	0	0	0	0	0	0	0	0	0	0	0	0	0	0	0	0	1	0	Belongs to the glycosyl hydrolase 43 family	GO:0004553	hydrolase activity, hydrolyzing O-glycosyl compounds
EHS25_007260	0	0	1	0	0	0	0	0	0	0	0	0	0	0	0	0	0	0	to TIGR gene model, INSD accession AAW42701.1	GO:0003677	DNA binding
EHS25_007266	0	0	1	0	0	0	0	0	0	0	0	0	0	0	0	0	0	0	Fungal specific transcription factor domain	GO:0000981	DNA-binding transcription factor activity, RNA polymerase II-specific
EHS25_007274	0	0	0	0	0	0	0	0	0	1	0	0	0	0	0	0	0	0	GDP-fucose protein O-fucosyltransferase	GO:0003735	structural constituent of ribosome
EHS25_007321	0	0	0	0	0	0	0	1	0	0	0	0	0	0	0	0	0	0	zinc ion binding	GO:0008270	zinc ion binding
EHS25_007346	0	0	0	0	0	0	0	0	0	0	1	0	0	0	0	0	0	0	to TIGR gene model, INSD accession	GO:0005381	iron ion transmembrane transporter activity
EHS25_007354	0	0	0	0	0	0	0	0	0	1	0	0	0	0	0	0	0	0	Component of the ubiquinol-cytochrome c reductase complex (complex III or cytochrome b-c1 complex) that is part of the mitochondrial respiratory chain. The b-c1 complex mediates electron transfer from ubiquinol to cytochrome c. Contributes to the generation of a proton gradient across the mitochondrial membrane that is then used for ATP synthesis	GO:0046872	metal ion binding
EHS25_007365	0	0	0	0	0	0	0	0	0	1	1	0	0	0	0	0	0	0	Core subunit of the mitochondrial membrane respiratory chain NADH dehydrogenase (Complex I) that is believed to belong to the minimal assembly required for catalysis. Complex I functions in the transfer of electrons from NADH to the respiratory chain. The immediate electron acceptor for the enzyme is believed to be ubiquinone	GO:0008137	NADH dehydrogenase (ubiquinone) activity
EHS25_007368	0	0	0	0	0	0	0	0	0	1	1	0	0	0	0	0	0	0	Cytochrome c oxidase is the component of the respiratory chain that catalyzes the reduction of oxygen to water. Subunits 1- 3 form the functional core of the enzyme complex. CO I is the catalytic subunit of the enzyme. Electrons originating in cytochrome c are transferred via the copper A center of subunit 2 and heme A of subunit 1 to the bimetallic center formed by heme A3 and copper B	GO:0003677	DNA binding
EHS25_007385	0	0	0	0	0	0	0	0	0	0	0	0	0	0	0	0	1	0	Belongs to the glycosyl hydrolase 5 (cellulase A) family	GO:0008237	metallopeptidase activity
EHS25_007390	0	0	1	0	0	0	0	0	0	0	0	0	0	0	0	0	0	0	zinc ion binding	GO:0008270	zinc ion binding
EHS25_007395	0	0	1	0	0	0	0	0	0	0	0	0	0	0	0	0	0	0	DNA binding	GO:0003677	DNA binding
EHS25_007439	0	0	0	0	0	0	0	1	1	0	0	0	0	0	0	0	0	0	DNA binding	GO:0003677	DNA binding
EHS25_007447	0	0	0	0	0	0	0	0	0	1	1	0	0	0	0	0	0	0	Ribosome-associated complex head domain	GO:0003677	DNA binding
EHS25_007455	0	0	0	0	0	0	0	0	0	0	0	0	0	1	0	0	0	0	Ubiquitin fusion degradation protein UFD1	GO:0031593	polyubiquitin modification-dependent protein binding
EHS25_007458	0	0	0	0	0	0	0	0	0	0	1	0	0	0	0	0	0	0	Major Facilitator Superfamily	GO:0022857	transmembrane transporter activity
EHS25_007465	0	0	0	0	0	0	0	0	0	1	0	0	0	0	0	0	0	0	UDP binding domain	GO:0051287	NAD binding
EHS25_007473	0	0	0	0	1	0	0	0	0	0	0	0	0	0	0	0	0	0	LSM domain	GO:0000339	RNA cap binding
EHS25_007487	0	0	0	0	0	0	0	0	0	0	0	0	0	1	0	1	0	0	Transketolase, pyrimidine binding domain	GO:0004739	pyruvate dehydrogenase (acetyl-transferring) activity
EHS25_007494	0	0	0	0	1	0	0	0	0	0	0	0	0	0	0	0	0	0	glutamate-5-semialdehyde dehydrogenase	GO:0003676	nucleic acid binding
EHS25_007495	0	0	0	0	0	0	0	0	1	0	0	0	0	0	0	0	0	0	Domain of Kin17 curved DNA-binding protein	GO:0003677	DNA binding
EHS25_007500	0	0	0	0	0	0	0	0	1	0	0	0	0	0	0	0	0	0	Domain of unknown function (DUF3543)	GO:0003677	DNA binding
EHS25_007501	0	0	0	0	1	0	0	0	0	0	0	0	0	0	0	0	0	0	Pyridoxal-phosphate dependent enzyme	GO:0046872	metal ion binding
EHS25_007508	0	0	0	0	0	0	0	0	0	1	1	0	0	0	0	0	0	0	Frataxin-like domain	GO:0003676	nucleic acid binding
EHS25_007550	0	0	0	0	0	0	0	1	1	0	0	0	0	0	0	0	0	0	Fungal specific transcription factor domain	GO:0001067	regulatory region nucleic acid binding
EHS25_007552	0	0	1	0	0	0	0	0	0	0	0	0	0	0	0	0	0	0	Specifically methylates the N1 position of guanosine-37 in various cytoplasmic and mitochondrial tRNAs. Methylation is not dependent on the nature of the nucleoside 5' of the target nucleoside. This is the first step in the biosynthesis of wybutosine (yW), a modified base adjacent to the anticodon of tRNAs and required for accurate decoding	GO:0009055	electron transfer activity
EHS25_007556	0	0	0	0	0	0	0	0	0	0	0	0	0	0	0	0	1	1	PA14 domain	GO:0016747	transferase activity, transferring acyl groups other than amino-acyl groups
EHS25_007558	0	1	0	0	0	0	0	0	0	0	0	0	0	0	0	0	0	0	CBF/Mak21 family	GO:0005634	nucleus
EHS25_007562	1	1	1	0	0	0	0	0	0	0	0	0	0	0	0	0	0	0	BP28CT (NUC211) domain	GO:0005730	nucleolus
EHS25_007564	1	0	1	0	0	0	0	0	0	0	0	0	0	0	0	0	0	0	DNA-directed RNA polymerases I, II, and III polypeptide	GO:0003968	RNA-directed 5'-3' RNA polymerase activity
EHS25_007580	0	0	0	0	0	0	0	1	1	0	0	0	0	0	0	0	0	0	GAL4-like Zn(II)2Cys6 (or C6 zinc) binuclear cluster DNA-binding domain	GO:0003677	DNA binding
EHS25_007585	0	0	0	1	0	0	0	0	0	0	0	0	0	0	0	0	0	0	lactate/malate dehydrogenase, NAD binding domain	GO:0003729	mRNA binding
EHS25_007588	0	0	0	0	0	0	0	0	0	0	0	0	0	1	0	0	0	0	Mitochondrial import protein Pam17	GO:0016021	integral component of membrane
EHS25_007601	0	0	0	0	0	0	0	0	0	1	1	0	0	0	0	0	0	0	AAA domain (dynein-related subfamily)	GO:0008308	voltage-gated anion channel activity
EHS25_007630	0	0	0	0	0	0	0	1	0	0	0	0	0	0	0	0	0	0	SWIB/MDM2 domain	GO:0001228	DNA-binding transcription activator activity, RNA polymerase II-specific
EHS25_007631	1	1	1	0	0	0	0	0	0	0	0	0	0	0	0	0	0	0	rRNA biogenesis protein RRP36	GO:0005730	nucleolus
EHS25_007639	0	0	1	0	0	0	0	0	0	0	0	0	0	0	0	0	0	0	Dihydrouridine synthase (Dus)	GO:0010181	FMN binding
EHS25_007640	0	0	0	0	0	0	0	0	0	0	1	0	0	0	0	0	0	0	GTP-binding protein involved in nucleocytoplasmic transport. Required for the import of protein into the nucleus and also for RNA export. Involved in chromatin condensation and control of cell cycle	GO:0005525	GTP binding
EHS25_007645	0	0	0	2	0	0	1	0	0	0	0	0	0	0	0	0	0	0	Ribosomal protein L6	GO:0003735	structural constituent of ribosome
EHS25_007650	0	0	0	0	0	0	0	0	0	0	0	0	0	1	0	1	0	0	Belongs to the lyase 1 family. Adenylosuccinate lyase subfamily	GO:0004018	N6-(1,2-dicarboxyethyl)AMP AMP-lyase (fumarate-forming) activity
EHS25_007652	0	0	0	0	0	0	0	1	1	0	0	0	0	0	0	0	0	0	RFX DNA-binding domain	GO:0003677	DNA binding
EHS25_007653	0	0	0	0	0	0	0	0	0	0	0	0	0	1	0	0	0	0	Thioredoxin	GO:0047134	protein-disulfide reductase activity
EHS25_007654	0	0	0	0	0	0	0	0	0	0	0	0	0	1	0	0	0	0	lactate/malate dehydrogenase, NAD binding domain	GO:0016787	hydrolase activity
EHS25_007657	0	0	0	0	1	0	0	0	0	0	0	0	0	0	0	0	0	0	Belongs to the mitochondrial carrier (TC 2.A.29) family	GO:0005347	ATP transmembrane transporter activity
EHS25_007676	0	0	0	0	1	1	0	0	0	0	0	0	0	0	0	0	0	0	Glycosyl hydrolase family 63 N-terminal domain	GO:0004573	mannosyl-oligosaccharide glucosidase activity
EHS25_007680	0	0	0	0	0	0	0	0	0	0	0	0	0	1	0	1	0	0	ATPsynthase alpha/beta subunit N-term extension	GO:0016787	hydrolase activity
EHS25_007681	0	0	0	1	0	0	0	0	0	0	0	0	0	0	0	0	0	0	alpha/beta hydrolase fold	GO:0052689	carboxylic ester hydrolase activity
EHS25_007682	0	0	0	0	0	0	0	0	0	0	0	0	0	1	0	0	0	0	WD40 repeats	GO:0032266	phosphatidylinositol-3-phosphate binding
EHS25_007689	0	0	0	0	0	0	0	0	0	0	0	0	0	1	0	0	0	0	Tim10/DDP family zinc finger	GO:0140318	protein transporter activity
EHS25_007691	0	0	0	0	1	1	0	0	0	0	0	0	0	0	0	0	0	0	Endoplasmic Reticulum Oxidoreductin 1 (ERO1)	GO:0140096	catalytic activity, acting on a protein
EHS25_007692	0	0	0	0	0	0	0	0	0	0	0	0	0	1	0	0	0	0	sulfite reductase (NADPH)	GO:0005524	ATP binding
EHS25_007710	0	0	0	0	0	0	0	0	0	0	0	0	0	1	0	0	0	0	The coatomer is a cytosolic protein complex that binds to dilysine motifs and reversibly associates with Golgi non- clathrin-coated vesicles, which further mediate biosynthetic protein transport from the ER, via the Golgi up to the trans Golgi network. Coatomer complex is required for budding from Golgi membranes, and is essential for the retrograde Golgi-to-ER transport of dilysine-tagged protei…	GO:0022857	transmembrane transporter activity
EHS25_007712	0	0	0	0	1	0	0	0	0	0	0	0	0	0	0	0	0	0	Histone-binding protein RBBP4 or subunit C of CAF1 complex	GO:0016740	transferase activity
EHS25_007732	0	0	0	0	0	0	0	0	0	1	0	1	0	0	0	0	0	0	3-oxo-5-alpha-steroid 4-dehydrogenase	GO:0016627	oxidoreductase activity, acting on the CH-CH group of donors
EHS25_007746	0	0	0	0	0	0	0	0	0	0	1	0	0	0	0	0	0	0	Major Facilitator Superfamily	GO:0022857	transmembrane transporter activity
EHS25_007752	0	0	0	0	0	0	0	0	0	1	1	1	0	0	0	0	0	0	UDP-N-acetylglucosamine transporter	GO:0016021	integral component of membrane
EHS25_007753	0	1	1	0	0	0	0	0	0	0	0	0	0	0	0	0	0	0	Superoxide dismutase	GO:0030515	snoRNA binding
EHS25_007756	0	0	0	0	0	0	0	0	0	0	0	0	0	0	0	1	0	0	Phosphoribosylaminoimidazole carboxylase	GO:0046872	metal ion binding
EHS25_007759	0	0	0	0	0	0	0	0	0	0	0	0	0	0	0	0	1	0	Belongs to the cysteine synthase cystathionine beta- synthase family	GO:0005509	calcium ion binding
EHS25_007763	0	0	0	0	0	0	0	0	0	0	0	0	0	1	0	0	0	0	Pyridine nucleotide-disulfide oxidoreductase	GO:0004792	thiosulfate sulfurtransferase activity
EHS25_007773	0	0	0	0	0	0	0	0	0	0	0	0	0	1	1	0	0	0	UCH-binding domain	GO:0005737	cytoplasm
EHS25_007782	0	0	0	0	0	0	0	1	1	0	0	0	0	0	0	0	0	0	GAL4-like Zn(II)2Cys6 (or C6 zinc) binuclear cluster DNA-binding domain	GO:0016757	transferase activity, transferring glycosyl groups
EHS25_007790	0	0	0	2	0	0	1	0	0	0	0	0	0	0	0	0	0	0	Ribosomal protein L21e	GO:0003735	structural constituent of ribosome
EHS25_007791	0	0	0	2	0	0	1	0	0	0	0	0	0	0	0	0	0	0	Belongs to the universal ribosomal protein uS4 family	GO:0003735	structural constituent of ribosome
EHS25_007811	0	0	0	0	0	0	0	0	0	0	0	0	0	1	0	0	0	0	cyclin binding protein	GO:0030674	protein-macromolecule adaptor activity
EHS25_007819	0	0	0	0	1	0	0	0	0	0	0	0	0	0	0	0	0	0	Modifier of rudimentary (Mod(r)) protein	GO:0043231	intracellular membrane-bounded organelle
EHS25_007821	0	0	0	1	1	0	1	0	0	0	0	0	0	0	0	0	0	0	S25 ribosomal protein	GO:0003677	DNA binding
EHS25_007824	0	0	0	1	1	0	1	0	0	0	0	0	0	0	0	0	0	0	Ribonuclease-III-like	GO:0003735	structural constituent of ribosome
EHS25_007834	1	1	1	0	0	0	0	0	0	0	0	0	0	0	0	0	0	0	Suppressor of forked protein (Suf)	GO:0003676	nucleic acid binding
EHS25_007841	0	0	0	0	0	0	0	0	0	0	0	0	0	1	0	0	0	0	Actin	GO:0032991	protein-containing complex
EHS25_007846	0	0	0	0	0	0	0	0	1	0	0	0	0	0	0	0	0	0	Major Facilitator Superfamily	GO:0003677	DNA binding
EHS25_007855	0	0	0	0	0	0	0	1	0	0	0	0	0	0	0	0	0	0	Sgf11 (transcriptional regulation protein)	GO:0003713	transcription coactivator activity
EHS25_007856	0	0	0	0	0	0	0	0	1	0	0	0	0	0	0	0	0	0	Histone H3	GO:0016491	oxidoreductase activity
EHS25_007860	0	0	0	0	0	0	0	0	0	0	0	0	0	1	0	0	0	0	Nuclear segregation protein Bfr1	GO:1990904	ribonucleoprotein complex
EHS25_007863	0	0	0	0	1	1	0	0	0	0	0	0	0	0	0	0	0	0	Glycosyl transferase family 2	GO:0046872	metal ion binding
EHS25_007864	0	0	0	0	0	0	0	1	1	0	0	0	0	0	0	0	0	0	CDC45-like protein	GO:0003697	single-stranded DNA binding
EHS25_007875	0	0	0	0	0	0	0	0	0	0	0	0	0	1	0	0	0	0	Starch/carbohydrate-binding module (family 53)	GO:0008157	protein phosphatase 1 binding
EHS25_007883	0	0	0	0	0	0	0	0	0	0	0	0	0	1	0	0	0	0	Erv1 / Alr family	GO:0046872	metal ion binding
EHS25_007902	0	0	0	0	0	0	0	1	1	0	0	0	0	0	0	0	0	0	DNA binding	GO:0003677	DNA binding
EHS25_007932	0	0	0	0	0	0	0	1	1	0	0	0	0	0	0	0	0	0	Fungal specific transcription factor domain	GO:0003677	DNA binding
EHS25_007956	0	0	0	0	0	0	0	0	1	0	0	0	0	0	0	0	0	0	Copper amine oxidase	GO:0003677	DNA binding
EHS25_007958	0	0	0	0	0	0	0	0	0	0	0	0	0	1	0	0	0	0	thiol-dependent ubiquitin-specific protease activity	GO:0005484	SNAP receptor activity
EHS25_007978	0	0	0	0	0	0	0	0	0	0	0	0	0	1	1	0	0	0	proteasome subunit	GO:0005524	ATP binding
EHS25_007988	0	0	0	0	0	0	0	0	0	0	0	0	0	1	0	0	0	0	UTP--glucose-1-phosphate uridylyltransferase	GO:0015267	channel activity
EHS25_007993	0	0	0	1	0	1	0	0	0	0	0	0	0	0	0	0	0	0	Uncharacterised protein family (UPF0121)	GO:0005783	endoplasmic reticulum
EHS25_008009	0	0	0	0	0	0	0	0	0	1	1	0	0	0	0	0	0	0	Belongs to the FAD-dependent glycerol-3-phosphate dehydrogenase family	GO:0005524	ATP binding
EHS25_008018	0	0	0	0	0	0	0	0	0	0	1	0	0	0	0	0	0	0	Cation efflux family	GO:0008324	cation transmembrane transporter activity
EHS25_008019	0	0	0	0	0	0	0	0	0	1	0	0	0	0	0	0	0	0	Belongs to the class I-like SAM-binding methyltransferase superfamily	GO:0042054	histone methyltransferase activity
EHS25_008049	0	0	1	0	0	0	0	0	0	0	0	0	0	0	0	0	0	0	hTAFII28-like protein conserved region	GO:0046982	protein heterodimerization activity
EHS25_008050	0	0	0	0	0	0	0	1	1	0	0	0	0	0	0	0	0	0	Fungal specific transcription factor domain	GO:0003677	DNA binding
EHS25_008060	0	0	0	0	1	0	1	0	0	0	0	0	0	0	0	0	0	0	39S mitochondrial ribosomal protein L46	GO:0003735	structural constituent of ribosome
EHS25_008070	1	0	1	0	0	0	0	0	0	0	0	0	0	0	0	0	0	0	transcription initiation factor	GO:0000993	RNA polymerase II complex binding
EHS25_008081	0	0	0	0	0	0	0	0	0	0	0	0	0	1	0	0	0	0	Squalene/phytoene synthase	GO:0030145	manganese ion binding
EHS25_008088	0	0	1	0	0	0	0	0	0	0	0	0	0	0	0	0	0	0	eRF1_1	GO:0003747	translation release factor activity
EHS25_008099	0	0	0	0	0	0	0	1	0	0	0	0	0	0	0	0	0	0	Histone deacetylase (HDAC) interacting	GO:0003714	transcription corepressor activity
EHS25_008104	0	0	0	0	1	1	0	0	0	0	0	0	0	0	0	0	0	0	Sec63 Brl domain	GO:0016021	integral component of membrane
EHS25_008106	0	0	1	0	0	0	0	0	0	0	0	0	0	0	0	0	0	0	tRNA (Guanine-1)-methyltransferase	GO:0000049	tRNA binding
EHS25_008108	0	0	0	0	1	0	1	0	0	0	0	0	0	0	0	0	0	0	Carbon-nitrogen hydrolase	GO:0000166	nucleotide binding
EHS25_008134	1	1	1	0	0	0	0	0	0	0	0	0	0	0	0	0	0	0	Utp13 specific WD40 associated domain	GO:0003824	catalytic activity
EHS25_008144	0	0	0	1	1	0	1	0	0	0	0	0	0	0	0	0	0	0	Ribosomal large subunit proteins 60S L5, and 50S L18	GO:0003735	structural constituent of ribosome
EHS25_008147	0	0	0	0	0	0	0	0	0	0	1	0	0	0	0	0	0	0	Belongs to the DHHC palmitoyltransferase family	GO:0004109	coproporphyrinogen oxidase activity
EHS25_008149	0	0	0	1	0	1	0	0	0	0	0	0	0	0	0	0	0	0	Phosphate transport (Pho88)	GO:0016021	integral component of membrane
EHS25_008150	0	0	0	1	0	0	0	0	0	0	0	0	0	0	0	0	0	0	Mitochondrial ATP synthase g subunit	GO:0015078	proton transmembrane transporter activity
EHS25_008157	0	0	0	0	0	0	0	0	0	0	0	0	0	1	0	0	0	0	ABC transporter transmembrane region 2	GO:0005324	long-chain fatty acid transporter activity
EHS25_008165	0	0	0	0	0	0	0	0	0	0	1	0	0	0	0	0	0	0	ZIP Zinc transporter	GO:0046873	metal ion transmembrane transporter activity
EHS25_008172	0	0	0	1	1	0	1	0	0	0	0	0	0	0	0	0	0	0	Binds to the 23S rRNA	GO:0004521	endoribonuclease activity
EHS25_008180	0	0	1	0	0	0	0	0	0	0	0	0	0	0	0	0	0	0	transcription initiation factor IIF subunit alpha	GO:0016251	RNA polymerase II general transcription initiation factor activity
EHS25_008187	0	0	0	1	0	1	0	0	0	0	0	0	0	0	0	0	0	0	Erg28 like protein	GO:0005515	protein binding
EHS25_008213	0	0	0	0	0	0	0	0	0	0	1	0	0	0	0	0	0	0	MFS general substrate transporter	GO:0022857	transmembrane transporter activity
EHS25_008222	0	0	0	2	0	0	0	0	0	0	0	0	0	0	0	0	0	0	Translationally controlled tumour protein	GO:0005509	calcium ion binding
EHS25_008233	0	0	0	0	0	0	0	0	0	0	0	0	0	1	1	0	0	0	ATPase family associated with various cellular activities (AAA)	GO:0005484	SNAP receptor activity
EHS25_008239	0	0	0	0	1	1	0	0	0	0	0	0	0	0	0	0	0	0	Mechanosensitive ion channel	GO:0005262	calcium channel activity
EHS25_008247	0	0	0	1	0	0	0	0	0	0	0	0	0	0	0	0	0	0	RTA1 like protein	GO:0005886	plasma membrane
EHS25_008293	0	0	0	0	0	0	0	0	0	0	0	0	0	1	0	0	0	0	ER-associated protein catabolism-related protein	GO:0003955	NAD(P)H dehydrogenase (quinone) activity
EHS25_008300	0	0	0	0	1	0	0	0	0	0	0	0	0	0	0	0	0	0	NAD-dependent glycerol-3-phosphate dehydrogenase N-terminus	GO:0051287	NAD binding
EHS25_008302	1	1	1	0	0	0	0	0	0	0	0	0	0	0	0	0	0	0	arm repeat-containing protein	GO:0003723	RNA binding
EHS25_008305	1	1	0	0	0	0	0	0	0	0	0	0	0	0	0	0	0	0	U3 snoRNA binding	GO:0005525	GTP binding
EHS25_008332	0	0	0	0	0	0	0	0	0	0	1	0	0	0	0	0	0	0	FAD-binding domain	GO:0016491	oxidoreductase activity
EHS25_008342	0	0	0	0	0	0	0	0	0	0	0	0	0	1	0	0	0	0	Catalyzes the cleavage of L-kynurenine (L-Kyn) and L-3- hydroxykynurenine (L-3OHKyn) into anthranilic acid (AA) and 3- hydroxyanthranilic acid (3-OHAA), respectively	GO:0016740	transferase activity
EHS25_008367	0	0	0	0	0	0	0	0	0	1	0	1	1	0	0	0	0	0	Alg9-like mannosyltransferase family	GO:0052917	dol-P-Man:Man(7)GlcNAc(2)-PP-Dol alpha-1,6-mannosyltransferase activity
EHS25_008382	0	0	0	0	0	0	0	0	0	0	0	0	0	1	0	0	0	0	PPIC-type PPIASE domain	GO:0008134	transcription factor binding
EHS25_008387	0	0	0	0	0	0	0	0	0	0	0	0	0	1	1	0	0	0	Proteasome beta subunits C terminal	GO:0004298	threonine-type endopeptidase activity
EHS25_008395	0	0	0	0	1	0	0	0	0	0	0	0	0	0	0	0	0	0	Belongs to the cytochrome b5 family	GO:0020037	heme binding
EHS25_008400	0	0	0	0	0	0	0	0	0	1	1	0	0	0	0	0	0	0	Belongs to the mitochondrial carrier (TC 2.A.29) family	GO:0005347	ATP transmembrane transporter activity
EHS25_008408	0	0	0	0	0	0	0	1	0	0	0	0	0	0	0	0	0	0	GAL4-like Zn(II)2Cys6 (or C6 zinc) binuclear cluster DNA-binding domain	GO:0008270	zinc ion binding
EHS25_008415	0	0	0	0	0	0	0	0	0	0	0	0	0	1	0	1	0	0	Zinc-finger domain	GO:0005524	ATP binding
EHS25_008427	0	0	0	0	0	0	0	0	0	0	0	0	0	1	0	0	0	0	Belongs to the heat shock protein 70 family	GO:0003676	nucleic acid binding
EHS25_008437	0	0	0	0	0	0	0	1	0	0	0	0	0	0	0	0	0	0	GAL4-like Zn(II)2Cys6 (or C6 zinc) binuclear cluster DNA-binding domain	GO:0008270	zinc ion binding
EHS25_008449	0	0	0	0	0	0	0	1	1	0	0	0	0	0	0	0	0	0	GAL4-like Zn(II)2Cys6 (or C6 zinc) binuclear cluster DNA-binding domain	GO:0003677	DNA binding
EHS25_008471	0	0	0	0	1	0	0	0	0	0	0	0	0	0	0	0	0	0	SNF2 family N-terminal domain	GO:0005829	cytosol
EHS25_008473	0	0	1	0	0	0	0	0	0	0	0	0	0	0	0	0	0	0	SNF2 family N-terminal domain	GO:0003677	DNA binding
EHS25_008475	0	0	1	0	0	0	0	0	0	0	0	0	0	0	0	0	0	0	tRNA synthetases class I (C) catalytic domain	GO:0004818	glutamate-tRNA ligase activity
EHS25_008483	0	0	0	0	1	0	0	0	0	0	0	0	0	0	0	0	0	0	Belongs to the small Tim family	GO:0016491	oxidoreductase activity
EHS25_008485	0	0	0	2	0	0	1	0	0	0	0	0	0	0	0	0	0	0	Belongs to the eukaryotic ribosomal protein eS26 family	GO:0005515	protein binding
EHS25_008500	0	0	0	0	0	0	0	0	0	0	1	0	0	0	0	0	0	0	Amino acid permease	GO:0015171	amino acid transmembrane transporter activity
EHS25_008519	0	0	0	0	0	0	0	1	1	0	0	0	0	0	0	0	0	0	DNA binding	GO:0003677	DNA binding
EHS25_008521	0	0	0	0	0	0	0	0	0	0	0	0	0	1	0	0	0	0	Male sterility protein	GO:0047012	sterol-4-alpha-carboxylate 3-dehydrogenase (decarboxylating) activity
EHS25_008524	0	0	0	0	0	0	0	0	0	0	0	0	0	1	0	1	0	0	NDK	GO:0003677	DNA binding
EHS25_008531	0	0	0	0	0	0	0	0	0	0	0	0	0	1	0	0	0	0	tRNA synthetases class I (W and Y)	GO:0022857	transmembrane transporter activity
EHS25_008560	1	1	1	0	0	0	0	0	0	0	0	0	0	0	0	0	0	0	Ribosomal protein S4/S9 N-terminal domain	GO:0016787	hydrolase activity
EHS25_008574	0	0	0	0	0	0	0	0	0	0	1	0	0	0	0	0	0	0	Belongs to the multicopper oxidase family	GO:0016491	oxidoreductase activity
EHS25_008575	0	0	0	0	0	0	0	0	0	0	1	0	0	0	0	0	0	0	Major Facilitator Superfamily	GO:0022857	transmembrane transporter activity
EHS25_008610	0	0	0	0	0	0	0	0	0	1	0	0	0	0	0	0	0	0	Thiamine pyrophosphate enzyme, N-terminal TPP binding domain	GO:0003677	DNA binding
EHS25_008618	0	0	0	0	0	0	0	0	0	0	0	0	0	0	0	1	0	0	NUDIX domain	GO:0000287	magnesium ion binding
EHS25_008637	0	0	0	0	0	0	0	0	0	0	1	0	0	0	0	0	0	0	Nucleoporin complex subunit 54	GO:0042802	identical protein binding
EHS25_008639	0	0	0	0	0	0	0	0	0	0	0	0	0	1	1	0	0	0	AAA domain (Cdc48 subfamily)	GO:0052925	dol-P-Man:Man(5)GlcNAc(2)-PP-Dol alpha-1,3-mannosyltransferase activity
EHS25_008643	0	0	0	0	0	0	0	0	0	0	0	0	0	1	0	0	0	0	Haspin like kinase domain	GO:0008289	lipid binding
EHS25_008645	0	0	0	0	0	0	0	0	1	0	0	0	0	0	0	0	0	0	Catalyzes the phosphorylation of D-fructose 6-phosphate to fructose 1,6-bisphosphate by ATP, the first committing step of glycolysis	GO:0003677	DNA binding
EHS25_008651	0	0	0	0	0	0	0	0	0	0	0	0	0	1	0	0	0	0	Essential subunit of the N-oligosaccharyl transferase (OST) complex which catalyzes the transfer of a high mannose oligosaccharide from a lipid-linked oligosaccharide donor to an asparagine residue within an Asn-X-Ser Thr consensus motif in nascent polypeptide chains	GO:0003735	structural constituent of ribosome
EHS25_008684	0	0	0	0	0	0	0	0	0	0	0	0	0	1	0	0	0	0	Glucosidase II beta subunit-like protein	GO:0030246	carbohydrate binding
EHS25_008690	0	0	1	0	0	0	0	0	0	0	0	0	0	0	0	0	0	0	RNA polymerase III subunit Rpc25	GO:0003677	DNA binding
EHS25_008699	0	0	0	0	0	0	0	0	0	0	1	0	0	0	0	0	0	0	Polysaccharide biosynthesis	GO:0008080	N-acetyltransferase activity
EHS25_008702	0	0	0	2	0	0	1	0	0	0	0	0	0	0	0	0	0	0	Belongs to the eukaryotic ribosomal protein eL20 family	GO:0003735	structural constituent of ribosome
EHS25_008705	0	0	0	2	0	0	1	0	0	0	0	0	0	0	0	0	0	0	Ribosomal protein L14	GO:0003723	RNA binding
EHS25_008707	0	0	0	0	0	0	0	0	1	0	0	0	0	0	0	0	0	0	Ammonium Transporter Family	GO:0003677	DNA binding
EHS25_008708	0	0	0	0	1	0	0	0	0	0	0	0	0	0	0	0	0	0	Catalyzes the formation of phosphatidylethanolamine (PtdEtn) from phosphatidylserine (PtdSer). Plays a central role in phospholipid metabolism and in the interorganelle trafficking of phosphatidylserine	GO:0046983	protein dimerization activity
EHS25_008731	0	0	0	0	0	0	0	0	0	0	0	0	0	1	0	0	0	0	60S ribosomal protein L4 C-terminal domain	GO:0003735	structural constituent of ribosome
EHS25_008738	0	0	0	0	0	0	0	0	0	1	1	0	0	0	0	0	0	0	Calponin homology domain	GO:0030674	protein-macromolecule adaptor activity
EHS25_008742	0	0	0	0	0	0	0	0	0	0	0	0	0	1	0	0	0	0	DnaJ molecular chaperone homology domain	GO:0003723	RNA binding
EHS25_008746	0	0	0	0	0	0	0	0	0	0	0	0	0	1	0	0	0	0	Functions as component of the Arp2 3 complex which is involved in regulation of actin polymerization and together with an activating nucleation-promoting factor (NPF) mediates the formation of branched actin networks	GO:0044877	protein-containing complex binding
EHS25_008748	0	0	0	1	0	1	0	0	0	0	0	0	0	0	0	0	0	0	MIR domain	GO:0003676	nucleic acid binding
EHS25_008753	0	0	1	0	0	0	0	0	0	0	0	0	0	0	0	0	0	0	Regulatory subunit of the poly(A)-nuclease (PAN) deadenylation complex, one of two cytoplasmic mRNA deadenylases involved in mRNA turnover. PAN specifically shortens poly(A) tails of RNA and the activity is stimulated by poly(A)-binding protein PAB1. PAN deadenylation is followed by rapid degradation of the shortened mRNA tails by the CCR4-NOT complex. Deadenylated mRNAs are then degraded by two …	GO:0005515	protein binding
EHS25_008768	0	0	0	0	0	0	0	0	0	0	0	0	0	1	0	0	0	0	Isocitrate/isopropylmalate dehydrogenase	GO:0005509	calcium ion binding
EHS25_008770	0	0	0	0	0	0	0	0	0	1	0	0	0	0	0	0	0	0	homoserine dehydrogenase	GO:0005524	ATP binding
EHS25_008804	0	0	0	0	0	0	0	0	0	0	0	0	0	1	0	0	0	0	Mitochondrial import receptor subunit Tom22	GO:0008320	protein transmembrane transporter activity
EHS25_008823	0	0	0	0	0	0	0	0	0	0	0	0	0	1	0	0	0	0	Golgi phosphoprotein 3 (GPP34)	GO:0019899	enzyme binding
EHS25_008828	0	0	0	0	0	0	0	0	0	0	0	0	0	1	0	0	0	0	WD40 repeats	GO:0003676	nucleic acid binding
EHS25_008835	0	0	0	0	0	0	0	0	0	0	1	0	0	0	0	0	0	0	Sybindin-like family	GO:0005737	cytoplasm
EHS25_008841	0	0	0	0	0	0	0	0	0	0	1	0	0	0	0	0	0	0	Fungal potassium channel	GO:0015079	potassium ion transmembrane transporter activity
EHS25_008842	0	0	1	0	0	0	0	0	0	0	0	0	0	0	0	0	0	0	tRNA synthetases class II core domain (F)	GO:0016491	oxidoreductase activity
EHS25_008845	0	0	0	1	0	0	0	0	0	0	0	0	0	0	0	0	0	0	glutathione	GO:0043295	glutathione binding
EHS25_008848	0	0	0	1	1	1	1	0	0	0	0	0	0	0	0	0	0	0	Ribosomal protein L44	GO:0016810	hydrolase activity, acting on carbon-nitrogen (but not peptide) bonds
EHS25_008859	0	0	0	0	0	0	0	1	1	0	0	0	0	0	0	0	0	0	to TIGR gene model, INSD accession	GO:0003677	DNA binding
EHS25_008860	0	0	0	1	0	0	0	0	0	0	0	0	0	0	0	0	0	0	tRNA synthetases class I (W and Y)	GO:0005524	ATP binding
EHS25_008866	0	0	0	0	0	0	0	0	0	0	0	0	0	1	1	0	0	0	AAA domain (Cdc48 subfamily)	GO:0008080	N-acetyltransferase activity
EHS25_008870	0	0	0	0	0	0	0	0	0	0	0	0	0	1	0	0	0	0	Syntaxin-5 N-terminal, Sly1p-binding domain	GO:0005484	SNAP receptor activity
EHS25_008881	0	0	0	0	0	0	0	1	0	0	0	0	0	0	0	0	0	0	DNA-binding transcription factor activity	GO:0003700	DNA-binding transcription factor activity
EHS25_008893	0	0	0	1	0	0	0	0	0	0	0	0	0	0	0	0	0	0	helicase superfamily c-terminal domain	GO:0008270	zinc ion binding
EHS25_008901	0	0	0	0	0	0	0	0	1	0	0	0	0	0	0	0	0	0	DNA binding	GO:0003677	DNA binding
EHS25_008929	0	0	0	0	0	0	0	1	1	0	0	0	0	0	0	0	0	0	Fungal specific transcription factor domain	GO:0003677	DNA binding
EHS25_008940	0	0	0	0	0	0	0	0	0	0	0	0	0	0	0	0	1	0	Ricin-type beta-trefoil	GO:0004553	hydrolase activity, hydrolyzing O-glycosyl compounds
EHS25_008947	0	0	0	0	0	0	0	1	1	0	0	0	0	0	0	0	0	0	pathway-specific nitrogen regulator	GO:0003677	DNA binding
EHS25_008974	0	0	1	0	0	0	0	0	0	0	0	0	0	0	0	0	0	0	Fungal specific transcription factor domain	GO:0003677	DNA binding
EHS25_008980	0	0	0	1	0	0	0	0	0	0	0	0	0	0	0	0	0	0	Alpha/beta hydrolase family	GO:0008270	zinc ion binding
EHS25_008983	0	0	0	0	0	0	0	1	1	0	0	0	0	0	0	0	0	0	DNA-binding transcription factor activity, RNA polymerase II-specific	GO:0000981	DNA-binding transcription factor activity, RNA polymerase II-specific
EHS25_009006	0	0	0	0	0	0	0	0	0	0	0	0	0	1	0	0	0	0	Belongs to the aldehyde dehydrogenase family	GO:0016620	oxidoreductase activity, acting on the aldehyde or oxo group of donors, NAD or NADP as acceptor
EHS25_009007	0	0	0	0	0	0	0	1	1	0	0	0	0	0	0	0	0	0	Fungal specific transcription factor domain	GO:0003677	DNA binding
EHS25_009010	0	0	0	0	0	0	0	0	1	0	0	0	0	0	0	0	0	0	Major Facilitator Superfamily	GO:0003677	DNA binding
EHS25_009021	0	0	0	0	0	0	0	0	0	1	0	0	0	0	0	0	0	0	Required for the assembly and or stability of the 40S ribosomal subunit. Required for the processing of the 20S rRNA- precursor to mature 18S rRNA in a late step of the maturation of 40S ribosomal subunits	GO:0046872	metal ion binding
EHS25_009028	0	0	1	0	0	0	0	0	0	0	0	0	0	0	0	0	0	0	Nuclear mRNA splicing	GO:0046872	metal ion binding
EHS25_009031	0	0	0	0	0	0	0	1	0	0	0	0	0	0	0	0	0	0	Amidase	GO:0003723	RNA binding
EHS25_009036	1	1	1	0	0	0	0	0	0	0	0	0	0	0	0	0	0	0	Nrap protein nucleotidyltransferase domain 4	GO:0003723	RNA binding
EHS25_009044	0	0	0	0	0	0	0	0	0	1	0	0	0	0	0	0	0	0	Functions as actin-binding component of the Arp2 3 complex which is involved in regulation of actin polymerization and together with an activating nucleation-promoting factor (NPF) mediates the formation of branched actin networks. Seems to contact the mother actin filament	GO:0060090	molecular adaptor activity
EHS25_009046	0	0	0	0	0	0	0	0	0	0	0	0	0	1	1	0	0	0	JAB/MPN domain	GO:0019901	protein kinase binding
EHS25_009049	0	0	1	0	0	0	0	0	0	0	0	0	0	0	0	0	0	0	DNA binding	GO:0003677	DNA binding
EHS25_009051	0	0	0	0	0	0	0	0	0	0	0	0	0	0	0	0	1	0	Belongs to the glycosyl hydrolase 5 (cellulase A) family	GO:0004553	hydrolase activity, hydrolyzing O-glycosyl compounds
EHS25_009091	0	0	1	0	0	0	0	0	0	0	0	0	0	0	0	0	0	0	RNA recognition motif	GO:0003723	RNA binding
EHS25_009099	0	0	0	0	0	0	0	0	0	0	0	0	0	1	0	0	0	0	Oxysterol-binding protein	GO:0016791	phosphatase activity
EHS25_009125	0	0	0	0	1	1	0	0	0	0	0	0	0	0	0	0	0	0	acetyltransferase, which acetylates the inositol ring of phosphatidylinositol during biosynthesis of GPI- anchor	GO:0050660	flavin adenine dinucleotide binding
EHS25_009126	1	1	1	0	0	0	0	0	0	0	0	0	0	0	0	0	0	0	Required for ribosome biogenesis. Part of a complex which catalyzes pseudouridylation of rRNA. This involves the isomerization of uridine such that the ribose is subsequently attached to C5, instead of the normal N1	GO:0003824	catalytic activity
EHS25_009130	1	0	1	0	0	0	0	0	0	0	0	0	0	0	0	0	0	0	DNA Topoisomerase I (eukaryota)	GO:0003677	DNA binding
EHS25_009132	0	0	0	0	0	0	0	1	0	0	0	0	0	0	0	0	0	0	Flavoprotein (FP) subunit of succinate dehydrogenase (SDH) that is involved in complex II of the mitochondrial electron transport chain and is responsible for transferring electrons from succinate to ubiquinone (coenzyme Q)	GO:0016787	hydrolase activity
EHS25_009136	0	0	0	0	0	0	0	0	0	0	0	0	0	1	1	0	0	0	motif in proteasome subunits, Int-6, Nip-1 and TRIP-15	GO:0016021	integral component of membrane
EHS25_009141	0	0	0	0	0	0	0	0	0	0	0	0	0	1	0	0	0	0	Actin	GO:0005524	ATP binding
EHS25_009145	0	0	0	0	0	0	0	0	0	0	0	0	0	1	0	0	0	0	mRNA splicing, via spliceosome	GO:0003779	actin binding
EHS25_009147	0	0	0	0	0	0	0	0	0	0	1	0	0	0	0	0	0	0	C-terminal domain of vertebrate Tap protein	GO:0005634	nucleus
EHS25_009165	0	0	1	0	0	0	0	0	0	0	0	0	0	0	0	0	0	0	SART-1 family	GO:0005634	nucleus
EHS25_009177	0	0	0	0	0	0	0	1	0	0	0	0	0	0	0	0	0	0	YEATS family	GO:0003743	translation initiation factor activity
EHS25_009191	0	0	0	0	0	0	0	0	1	0	0	0	0	0	0	0	0	0	CASP C terminal	GO:0008168	methyltransferase activity
EHS25_009194	0	0	0	0	0	0	0	0	0	0	0	0	0	1	0	0	0	0	Voltage-gated potassium channel beta-2 subunit	GO:0016491	oxidoreductase activity
EHS25_009196	0	0	0	0	0	0	0	1	1	0	0	0	0	0	0	0	0	0	Protein tyrosine kinase	GO:0003677	DNA binding
EHS25_009197	0	0	0	0	0	0	0	1	0	0	0	0	0	0	0	0	0	0	Nuclear pore protein 84 / 107	GO:0017056	structural constituent of nuclear pore
EHS25_009199	0	0	0	0	0	0	0	0	0	1	0	0	0	0	0	0	0	0	Mitochondrial ribosomal protein L31	GO:0003735	structural constituent of ribosome
EHS25_009211	0	0	0	0	0	0	0	0	0	0	0	0	0	1	0	0	0	0	FAD-dependent monooxygenase required for the C5-ring hydroxylation during ubiquinone biosynthesis. Catalyzes the hydroxylation of 3-polyprenyl-4-hydroxybenzoic acid to 3- polyprenyl-4,5-dihydroxybenzoic acid. The electrons required for the hydroxylation reaction may be funneled indirectly from NADPH via a ferredoxin ferredoxin reductase system to COQ6	GO:0016788	hydrolase activity, acting on ester bonds
EHS25_009217	0	0	0	0	1	0	0	0	0	0	0	0	0	0	0	0	0	0	Catalyzes the first intracellular reaction of sulfate assimilation, forming adenosine-5'-phosphosulfate (APS) from inorganic sulfate and ATP. Plays an important role in sulfate activation as a component of the biosynthesis pathway of sulfur- containing amino acids	GO:0003677	DNA binding
EHS25_009223	0	0	0	0	0	0	0	0	0	0	0	0	0	1	0	0	0	0	CutC family	GO:0020037	heme binding
EHS25_009226	0	0	0	0	0	0	0	0	0	0	0	0	0	1	0	0	0	0	Phosphoenolpyruvate carboxykinase	GO:0016301	kinase activity
EHS25_009230	1	0	1	0	0	0	0	0	0	0	0	0	0	0	0	0	0	0	Ku70/Ku80 C-terminal arm	GO:0003690	double-stranded DNA binding
EHS25_009231	0	0	0	0	0	0	0	1	1	0	0	0	0	0	0	0	0	0	6-phosphofructo-2-kinase	GO:0003677	DNA binding
EHS25_009239	0	0	0	0	1	0	0	0	0	0	0	0	0	0	0	0	0	0	Thiamine monophosphate synthase	GO:0046872	metal ion binding
EHS25_009243	0	0	0	0	0	0	0	0	0	0	0	0	0	1	0	0	0	0	The glycine cleavage system catalyzes the degradation of glycine	GO:0004375	glycine dehydrogenase (decarboxylating) activity
EHS25_009250	0	0	1	0	0	0	0	0	0	0	0	0	0	0	0	0	0	0	Serine/Threonine protein kinases, catalytic domain	GO:0070917	inositol phosphoceramide synthase regulator activity
EHS25_009264	0	0	0	0	0	0	0	0	0	1	1	0	0	0	0	0	0	0	Tim17/Tim22/Tim23/Pmp24 family	GO:0015399	primary active transmembrane transporter activity
EHS25_009267	0	0	0	0	0	0	0	0	0	0	0	0	0	1	0	0	0	0	Malic enzyme, NAD binding domain	GO:0005524	ATP binding
EHS25_009272	1	1	0	0	0	0	0	0	0	0	0	0	0	0	0	0	0	0	CBF/Mak21 family	GO:0003682	chromatin binding
EHS25_009273	0	0	0	0	0	0	0	0	0	0	0	0	0	1	0	0	0	0	Response to drug-related protein	GO:0030674	protein-macromolecule adaptor activity
EHS25_009277	1	0	0	0	0	0	0	0	0	0	0	0	0	0	0	0	0	0	SRP40, C-terminal domain	GO:0005730	nucleolus
EHS25_009282	0	0	0	0	1	0	0	0	0	0	0	0	0	0	0	0	0	0	assists the folding of proteins upon ATP hydrolysis	GO:0046872	metal ion binding
EHS25_009284	0	0	0	0	0	0	0	0	0	1	1	1	0	0	0	0	0	0	Nonessential protein required for the fusion of transport vesicles derived from the endocytic pathway with the Golgi complex	GO:0016021	integral component of membrane
EHS25_009287	0	0	0	0	0	0	0	0	0	1	0	0	0	0	0	0	0	0	Glycosyl transferase family 2	GO:0016757	transferase activity, transferring glycosyl groups
EHS25_009298	0	0	0	0	0	0	0	0	0	0	0	0	0	1	0	0	0	0	regulation of microtubule motor activity	GO:0008017	microtubule binding
EHS25_009317	0	0	0	0	0	0	0	0	0	0	0	0	0	1	0	0	0	0	Trehalose-phosphatase	GO:0004805	trehalose-phosphatase activity
EHS25_009325	1	0	1	0	0	0	0	0	0	0	0	0	0	0	0	0	0	0	Belongs to the MYST (SAS MOZ) family	GO:0003677	DNA binding
EHS25_009333	0	0	0	0	0	0	0	0	0	0	0	0	0	1	1	0	0	0	Proteasome subunit	GO:0019903	protein phosphatase binding
EHS25_009339	0	0	0	0	0	0	0	0	0	1	1	0	0	0	0	0	0	0	Belongs to the mitochondrial carrier (TC 2.A.29) family	GO:0005347	ATP transmembrane transporter activity
EHS25_009358	0	0	0	0	1	0	0	0	0	0	0	0	0	0	0	0	0	0	Belongs to the Ca(2 ) cation antiporter (CaCA) (TC 2.A.19) family	GO:0005524	ATP binding
EHS25_009392	0	0	0	1	1	0	1	0	0	0	0	0	0	0	0	0	0	0	Ribosomal_L32e	GO:0003735	structural constituent of ribosome
EHS25_009395	0	0	0	0	0	0	0	0	0	0	0	0	0	1	0	0	0	0	ETC complex I subunit conserved region	GO:0005743	mitochondrial inner membrane
EHS25_009398	0	0	0	0	2	0	1	0	0	0	0	0	0	0	0	0	0	0	Belongs to the universal ribosomal protein uL13 family	GO:0003735	structural constituent of ribosome
EHS25_009400	0	0	0	0	0	0	0	0	0	0	0	0	0	1	0	0	0	0	Thioredoxin-like domain	GO:0016740	transferase activity
EHS25_009401	0	0	0	0	0	0	0	0	0	0	0	0	0	1	0	0	0	0	chloride channel activity	GO:0016853	isomerase activity
EHS25_009426	1	0	1	0	0	0	0	0	0	0	0	0	0	0	0	0	0	0	Component of the Mediator complex, a coactivator involved in the regulated transcription of nearly all RNA polymerase II-dependent genes. Mediator functions as a bridge to convey information from gene-specific regulatory proteins to the basal RNA polymerase II transcription machinery	GO:0003712	transcription coregulator activity
EHS25_009427	1	1	1	0	0	0	0	0	0	0	0	0	0	0	0	0	0	0	Ribosomal protein S8e	GO:0005730	nucleolus
EHS25_009432	0	0	0	0	0	0	0	0	0	1	1	1	0	0	0	0	0	0	Eukaryotic protein of unknown function (DUF846)	GO:0046872	metal ion binding
EHS25_009438	0	0	0	0	0	0	0	0	0	0	0	0	0	1	0	1	0	0	CybS, succinate dehydrogenase cytochrome B small subunit	GO:0046872	metal ion binding
EHS25_009452	1	1	1	0	0	0	0	0	0	0	0	0	0	0	0	0	0	0	DUF4217	GO:0005524	ATP binding
EHS25_009465	0	0	0	0	0	0	0	0	0	0	0	0	0	1	0	0	0	0	PPIases accelerate the folding of proteins. It catalyzes the cis-trans isomerization of proline imidic peptide bonds in oligopeptides	GO:0016018	cyclosporin A binding
EHS25_009470	0	0	0	0	0	0	0	0	0	0	0	0	0	1	0	1	0	0	Belongs to the complex I 75 kDa subunit family	GO:0016614	oxidoreductase activity, acting on CH-OH group of donors
EHS25_009476	1	0	1	0	0	0	0	0	0	0	0	0	0	0	0	0	0	0	A49-like RNA polymerase I associated factor	GO:0003677	DNA binding
EHS25_009499	0	0	0	0	0	0	0	0	0	0	0	0	0	1	0	1	0	0	2-oxoacid dehydrogenases acyltransferase (catalytic domain)	GO:0005085	guanyl-nucleotide exchange factor activity
EHS25_009503	0	0	0	0	0	0	0	0	0	0	0	0	0	1	0	0	0	0	Cofilin/tropomyosin-type actin-binding protein	GO:0044877	protein-containing complex binding
EHS25_009507	0	0	0	0	0	0	0	0	0	1	0	0	0	0	0	0	0	0	UDP-glucose:Glycoprotein Glucosyltransferase	GO:0003980	UDP-glucose:glycoprotein glucosyltransferase activity
EHS25_009519	0	0	0	0	0	0	0	0	0	1	0	0	0	0	0	0	0	0	Histidine biosynthesis protein	GO:0005524	ATP binding
EHS25_009521	0	0	0	0	2	0	0	0	0	0	0	0	0	0	0	0	0	0	mRNA cap-binding component of the eukaryotic translation initiation factor 3 (eIF-3) complex, which is involved in protein synthesis of a specialized repertoire of mRNAs and, together with other initiation factors, stimulates binding of mRNA and methionyl-tRNAi to the 40S ribosome. The eIF-3 complex specifically targets and initiates translation of a subset of mRNAs involved in cell proliferation…	GO:0016787	hydrolase activity
EHS25_009537	0	0	1	0	0	0	0	0	0	0	0	0	0	0	0	0	0	0	domain in protein kinases, N-glycanases and other nuclear proteins	GO:0004519	endonuclease activity
EHS25_009540	0	0	0	0	0	0	0	0	0	0	1	0	0	0	0	0	0	0	Sedlin, N-terminal conserved region	GO:0005737	cytoplasm
EHS25_009554	0	0	1	0	0	0	0	0	0	0	0	0	0	0	0	0	0	0	Putative zinc finger motif, C2HC5-type	GO:0008270	zinc ion binding
EHS25_009555	0	0	0	0	1	1	0	0	0	0	0	0	0	0	0	0	0	0	ER to Golgi transport-related protein	GO:0005768	endosome
EHS25_009556	0	0	0	0	0	0	0	0	0	1	0	0	0	0	0	0	0	0	Serine-threonine protein phosphatase N-terminal domain	GO:0005524	ATP binding
EHS25_009568	0	0	0	0	0	0	0	0	0	1	1	0	0	0	0	0	0	0	phosphatase	GO:0004721	phosphoprotein phosphatase activity
EHS25_009569	0	0	1	0	0	0	0	0	0	0	0	0	0	0	0	0	0	0	Fungal specific transcription factor domain	GO:0003677	DNA binding
EHS25_009578	0	0	0	1	0	1	0	0	0	0	0	0	0	0	0	0	0	0	Male sterility protein	GO:0030246	carbohydrate binding
EHS25_009579	1	1	1	0	0	0	0	0	0	0	0	0	0	0	0	0	0	0	Belongs to the class I-like SAM-binding methyltransferase superfamily. RsmB NOP family	GO:0003723	RNA binding
EHS25_009585	0	0	0	0	0	0	0	0	0	0	0	0	0	1	1	0	0	0	CSN8/PSMD8/EIF3K family	GO:0000790	nuclear chromatin
EHS25_009590	0	0	0	0	2	0	1	0	0	0	0	0	0	0	0	0	0	0	Belongs to the universal ribosomal protein uL15 family	GO:0003735	structural constituent of ribosome
EHS25_009597	0	0	0	0	0	0	0	0	0	0	0	0	0	1	0	0	0	0	Tudor domain	GO:0004518	nuclease activity
EHS25_009615	0	0	0	0	0	0	0	0	0	0	0	0	0	1	0	0	0	0	Glycosyl transferase family 2	GO:0020037	heme binding
EHS25_009622	0	0	0	0	0	0	0	0	0	0	0	0	0	1	0	0	0	0	f-box protein pof6	GO:0005737	cytoplasm
EHS25_009636	0	0	0	0	0	0	0	1	1	0	0	0	0	0	0	0	0	0	GAL4-like Zn(II)2Cys6 (or C6 zinc) binuclear cluster DNA-binding domain	GO:0003677	DNA binding
EHS25_009660	0	0	0	1	0	0	0	0	0	0	0	0	0	0	0	0	0	0	PRELI-like family	GO:0005758	mitochondrial intermembrane space
EHS25_009663	0	0	0	1	1	0	1	0	0	0	0	0	0	0	0	0	0	0	Belongs to the eukaryotic ribosomal protein eL19 family	GO:0046872	metal ion binding
EHS25_009668	0	0	0	0	0	0	0	0	1	0	0	0	0	0	0	0	0	0	DUF4208	GO:0003677	DNA binding
EHS25_009677	0	0	0	0	0	0	0	0	0	0	0	0	0	1	0	0	0	0	WD domain, G-beta repeat	GO:0005198	structural molecule activity
EHS25_009707	0	0	0	0	0	0	0	0	1	0	0	0	0	0	0	0	0	0	Fingers domain of DNA polymerase lambda	GO:0016301	kinase activity
EHS25_009714	0	0	1	0	0	0	0	0	0	0	0	0	0	0	0	0	0	0	Mitosis protein DIM1	GO:0046540	U4/U6 x U5 tri-snRNP complex
EHS25_009715	0	0	0	1	0	0	0	0	0	0	0	0	0	0	0	0	0	0	Destroys radicals which are normally produced within the cells and which are toxic to biological systems	GO:0046872	metal ion binding
EHS25_009735	0	0	0	0	2	0	1	0	0	0	0	0	0	0	0	0	0	0	Belongs to the eukaryotic ribosomal protein eS8 family	GO:0015078	proton transmembrane transporter activity
EHS25_009738	1	0	0	0	0	0	0	0	0	0	0	0	0	0	0	0	0	0	Histone-like transcription factor (CBF/NF-Y) and archaeal histone	GO:0046982	protein heterodimerization activity
EHS25_009741	0	0	0	1	0	0	0	0	0	0	0	0	0	0	0	0	0	0	Vacuolar protein sorting 55	GO:0016021	integral component of membrane
EHS25_009747	0	0	0	1	0	1	0	0	0	0	0	0	0	0	0	0	0	0	Oligosaccharyl transferase STT3 subunit	GO:0046872	metal ion binding
EHS25_009756	0	0	0	0	0	0	0	1	0	0	0	0	0	0	0	0	0	0	Component of the SRB8-11 complex. The SRB8-11 complex is a regulatory module of the Mediator complex which is itself involved in regulation of basal and activated RNA polymerase II- dependent transcription. The SRB8-11 complex may be involved in the transcriptional repression of a subset of genes regulated by Mediator. It may inhibit the association of the Mediator complex with RNA polymerase II …	GO:0003712	transcription coregulator activity
EHS25_009760	0	0	0	0	0	0	0	0	0	0	1	0	0	0	0	0	0	0	Magnesium transporter NIPA	GO:0004563	beta-N-acetylhexosaminidase activity
EHS25_009773	0	0	0	0	0	0	0	0	0	1	0	0	0	0	0	0	0	0	Catalyzes the 6-electron oxidation of protoporphyrinogen-IX to form protoporphyrin-IX	GO:0046872	metal ion binding
EHS25_009774	0	0	0	0	0	0	0	1	0	0	0	0	0	0	0	0	0	0	Belongs to the class V-like SAM-binding methyltransferase superfamily. Histone-lysine methyltransferase family. SET2 subfamily	GO:0016614	oxidoreductase activity, acting on CH-OH group of donors
EHS25_009776	0	0	0	0	2	0	1	0	0	0	0	0	0	0	0	0	0	0	Belongs to the universal ribosomal protein uS12 family	GO:0003735	structural constituent of ribosome
EHS25_009779	0	0	0	0	0	0	0	0	1	0	0	0	0	0	0	0	0	0	Origin recognition complex (ORC) subunit 4 C-terminus	GO:0003677	DNA binding
EHS25_009785	0	0	0	0	1	0	0	0	0	0	0	0	0	0	0	0	0	0	transferase activity, transferring glycosyl groups	GO:0016757	transferase activity, transferring glycosyl groups
EHS25_009807	0	0	0	0	1	0	0	0	0	0	0	0	0	0	0	0	0	0	TIM23 mitochondrial import inner membrane translocase complex	GO:0005744	TIM23 mitochondrial import inner membrane translocase complex
EHS25_009820	0	0	0	1	0	1	0	0	0	0	0	0	0	0	0	0	0	0	Catalyzes the first step of the methylation pathway of phosphatidylcholine biosynthesis, the SAM-dependent methylation of phosphatidylethanolamine (PE) to phosphatidylmonomethylethanolamine (PMME)	GO:0004608	phosphatidylethanolamine N-methyltransferase activity
EHS25_009843	0	0	0	0	0	0	0	1	1	0	0	0	0	0	0	0	0	0	FORKHEAD	GO:0003700	DNA-binding transcription factor activity
EHS25_009845	0	0	0	0	0	0	0	0	0	0	0	0	0	1	0	0	0	0	Actin	GO:0005524	ATP binding
EHS25_009849	0	0	0	0	0	0	0	0	1	0	0	0	0	0	0	0	0	0	nitrogen assimilation transcription factor	GO:0003677	DNA binding
EHS25_009878	0	0	0	0	0	0	0	0	0	0	1	0	0	0	0	0	0	0	MFS general substrate transporter	GO:0022857	transmembrane transporter activity
EHS25_009885	0	0	0	0	0	0	0	1	1	0	0	0	0	0	0	0	0	0	Phytanoyl-CoA dioxygenase (PhyH)	GO:0003677	DNA binding
EHS25_009892	0	0	0	0	0	0	0	0	0	0	0	0	0	1	0	0	0	0	LSM domain	GO:0008233	peptidase activity
EHS25_009893	0	0	0	0	0	0	0	0	0	0	0	0	0	1	0	0	0	0	GHMP kinases N terminal domain	GO:0008080	N-acetyltransferase activity
EHS25_009904	0	0	0	0	0	0	0	1	1	0	0	0	0	0	0	0	0	0	DNA-binding protein cre-1	GO:0003677	DNA binding
EHS25_009911	0	0	0	0	0	0	0	0	0	0	0	0	0	0	0	0	1	0	Belongs to the glycosyl hydrolase 5 (cellulase A) family	GO:0004553	hydrolase activity, hydrolyzing O-glycosyl compounds
EHS25_009918	0	0	0	0	1	1	0	0	0	0	0	0	0	0	0	0	0	0	Sec61beta family	GO:0016021	integral component of membrane
EHS25_009923	0	0	0	0	0	0	0	1	1	0	0	0	0	0	0	0	0	0	MADS	GO:0046983	protein dimerization activity
EHS25_009949	0	0	0	0	0	0	0	0	0	0	0	0	0	1	0	0	0	0	D123	GO:0005524	ATP binding
EHS25_009955	1	1	1	0	0	0	0	0	0	0	0	0	0	0	0	0	0	0	Component of the NOP7 complex, which is required for maturation of the 25S and 5.8S ribosomal RNAs and formation of the 60S ribosome	GO:0043021	ribonucleoprotein complex binding
EHS25_009985	0	0	0	0	0	0	0	0	0	0	1	0	0	0	0	0	0	0	SNARE associated Golgi protein	GO:0022857	transmembrane transporter activity
EHS25_009987	0	0	0	0	0	0	0	0	0	0	0	0	0	1	1	0	0	0	proteasome assembly	GO:0034515	proteasome storage granule
EHS25_009996	0	0	0	0	0	0	0	0	0	0	0	0	0	1	0	0	0	0	Spc19	GO:0005737	cytoplasm
EHS25_010007	0	1	1	0	0	0	0	0	0	0	0	0	0	0	0	0	0	0	Essential protein required for the accumulation of box C D snoRNA	GO:0005524	ATP binding
EHS25_010009	0	0	0	0	2	0	1	0	0	0	0	0	0	0	0	0	0	0	Ribosomal protein S24e	GO:0003735	structural constituent of ribosome
EHS25_010025	0	0	0	0	0	0	0	0	0	0	0	0	0	1	0	0	0	0	Protein prenyltransferase alpha subunit repeat	GO:0020037	heme binding
EHS25_010029	0	0	0	0	0	0	0	1	0	0	0	0	0	0	0	0	0	0	Enhancer of polycomb-like	GO:0005524	ATP binding
EHS25_010031	0	0	0	0	0	0	0	0	1	0	0	0	0	0	0	0	0	0	AAA domain	GO:0008408	3'-5' exonuclease activity
EHS25_010037	1	0	1	0	0	0	0	0	0	0	0	0	0	0	0	0	0	0	Component of the core-TFIIH basal transcription factor involved in nucleotide excision repair (NER) of DNA	GO:0003690	double-stranded DNA binding
EHS25_010057	1	1	1	0	0	0	0	0	0	0	0	0	0	0	0	0	0	0	RNA cytidine acetyltransferase with specificity toward both 18S rRNA and tRNAs. Catalyzes the formation of N(4)- acetylcytidine (ac4C) in 18S rRNA. Required for early nucleolar cleavages of precursor rRNA at sites A0, A1 and A2 during 18S rRNA synthesis. Catalyzes the formation of ac4C in serine and leucine tRNAs. Requires the tRNA-binding adapter protein TAN1 for full tRNA acetyltransferase acti…	GO:0004386	helicase activity
EHS25_010058	1	0	1	0	0	0	0	0	0	0	0	0	0	0	0	0	0	0	Transcription factor IIA, alpha/beta subunit	GO:0003743	translation initiation factor activity
EHS25_010062	0	0	0	0	0	0	0	0	0	0	0	0	0	1	0	0	0	0	Kinase-like	GO:0005524	ATP binding
EHS25_010075	1	1	1	0	0	0	0	0	0	0	0	0	0	0	0	0	0	0	Belongs to the protein kinase superfamily. RIO-type Ser Thr kinase family	GO:0016787	hydrolase activity
EHS25_010090	0	0	0	0	0	0	0	0	0	0	0	0	0	1	0	0	0	0	Domain of unknown function (DUF543)	GO:0044284	mitochondrial crista junction
EHS25_010095	0	0	0	0	0	0	0	0	0	0	0	0	0	1	0	0	0	0	otu-domain-containing protein	GO:0008234	cysteine-type peptidase activity
EHS25_010102	0	0	0	0	0	0	0	0	0	0	0	0	0	1	0	0	0	0	Acyl-CoA dehydrogenase, C-terminal domain	GO:0003723	RNA binding
EHS25_010103	0	0	0	0	0	0	0	0	0	0	0	0	0	1	0	1	0	0	Acetokinase family	GO:0004222	metalloendopeptidase activity
EHS25_010108	0	0	0	1	0	0	0	0	0	0	0	0	0	0	0	0	0	0	ACT domain	GO:0022857	transmembrane transporter activity
EHS25_010109	0	0	0	0	0	0	0	0	0	0	0	0	0	1	0	0	0	0	Belongs to the mitochondrial carrier (TC 2.A.29) family	GO:0005371	tricarboxylate secondary active transmembrane transporter activity
EHS25_010116	0	0	0	0	0	0	0	1	1	0	0	0	0	0	0	0	0	0	Fungal specific transcription factor domain	GO:0003677	DNA binding
EHS25_010119	0	0	0	1	0	1	0	0	0	0	0	0	0	0	0	0	0	0	Belongs to the heat shock protein 70 family	GO:0003676	nucleic acid binding
EHS25_010121	0	0	0	0	2	0	1	0	0	0	0	0	0	0	0	0	0	0	Belongs to the bacterial ribosomal protein bL17 family	GO:0003735	structural constituent of ribosome
EHS25_010125	0	0	0	0	0	0	0	0	0	0	0	0	0	1	0	0	0	0	Clp protease	GO:0008270	zinc ion binding
EHS25_010129	0	0	0	0	0	0	0	0	0	1	0	0	0	0	0	0	0	0	snRNP Sm proteins	GO:0005515	protein binding
EHS25_010131	0	0	0	0	0	0	0	0	0	1	1	1	0	0	0	0	0	0	Belongs to the monovalent cation proton antiporter 1 (CPA1) transporter (TC 2.A.36) family	GO:0004601	peroxidase activity
EHS25_010137	0	0	0	0	1	0	0	0	0	0	0	0	0	0	0	0	0	0	Calcineurin-like phosphoesterase	GO:0016787	hydrolase activity
EHS25_010157	0	0	0	0	1	1	0	0	0	0	0	0	0	0	0	0	0	0	B-cell receptor-associated protein 31-like	GO:0016021	integral component of membrane
EHS25_010160	0	0	0	0	0	0	0	0	0	0	0	0	0	1	0	1	0	0	Core subunit of the mitochondrial membrane respiratory chain NADH dehydrogenase (Complex I) that is believed to belong to the minimal assembly required for catalysis. Complex I functions in the transfer of electrons from NADH to the respiratory chain	GO:0046872	metal ion binding
EHS25_010161	0	0	0	0	0	0	0	1	1	0	0	0	0	0	0	0	0	0	DNA binding	GO:0003677	DNA binding
EHS25_010176	0	0	0	0	0	0	0	0	0	1	1	1	0	0	0	0	0	0	Intracellular phospholipase B that catalyzes the double deacylation of phosphatidylcholine (PC) to glycerophosphocholine (GroPCho). Plays an important role in membrane lipid homeostasis	GO:0005198	structural molecule activity
EHS25_010177	1	1	0	0	0	0	0	0	0	0	0	0	0	0	0	0	0	0	Cupin-like domain	GO:0003723	RNA binding
EHS25_010191	0	0	0	0	0	0	0	0	0	1	1	0	0	0	0	0	0	0	Tim10/DDP family zinc finger	GO:0046872	metal ion binding
EHS25_010194	0	0	0	0	1	0	0	0	0	0	0	0	0	0	0	0	0	0	GRIP domain	GO:0005794	Golgi apparatus
EHS25_010197	0	0	1	0	0	0	0	0	0	0	0	0	0	0	0	0	0	0	Acetyltransferase (GNAT) family	GO:1990189	peptide-serine-N-acetyltransferase activity
EHS25_010203	0	1	1	0	0	0	0	0	0	0	0	0	0	0	0	0	0	0	Las1-like	GO:0004519	endonuclease activity
EHS25_010205	0	0	0	0	0	0	0	0	0	0	0	0	0	1	0	0	0	0	thiosulfate sulfurtransferase	GO:0016784	3-mercaptopyruvate sulfurtransferase activity
EHS25_010206	0	0	0	0	0	0	0	0	0	0	0	0	0	1	0	1	0	0	The coatomer is a cytosolic protein complex that binds to dilysine motifs and reversibly associates with Golgi non- clathrin-coated vesicles, which further mediate biosynthetic protein transport from the ER, via the Golgi up to the trans Golgi network. Coatomer complex is required for budding from Golgi membranes, and is essential for the retrograde Golgi-to-ER transport of dilysine-tagged protei…	GO:0005524	ATP binding
EHS25_010211	0	0	0	0	0	0	0	0	0	1	1	0	0	0	0	0	0	0	ATP-dependent serine protease that mediates the selective degradation of misfolded, unassembled or oxidatively damaged polypeptides as well as certain short-lived regulatory proteins in the mitochondrial matrix. May also have a chaperone function in the assembly of inner membrane protein complexes. Participates in the regulation of mitochondrial gene expression and in the maintenance of the integ…	GO:0003697	single-stranded DNA binding
EHS25_010214	1	1	1	0	0	0	0	0	0	0	0	0	0	0	0	0	0	0	Bystin	GO:0030515	snoRNA binding
EHS25_010221	0	0	0	0	0	0	0	0	0	0	1	0	0	0	0	0	0	0	to TIGR gene model, INSD accession	GO:0005381	iron ion transmembrane transporter activity
EHS25_010234	0	0	0	0	0	0	0	0	0	0	0	0	0	1	0	0	0	0	Uncharacterised protein family (UPF0160)	GO:0005737	cytoplasm
EHS25_010250	0	0	0	0	0	0	0	0	0	1	0	0	0	0	0	0	0	0	Isocitrate dehydrogenase	GO:0000287	magnesium ion binding
EHS25_010253	0	0	0	1	1	0	1	0	0	0	0	0	0	0	0	0	0	0	Ribosomal protein 60S L18 and 50S L18e	GO:0003723	RNA binding
EHS25_010255	0	0	0	1	0	1	0	0	0	0	0	0	0	0	0	0	0	0	Adds multiple copies of isopentenyl pyrophosphate (IPP) to farnesyl pyrophosphate (FPP) to produce dehydrodolichyl diphosphate (Dedol-PP), a precursor of dolichol which is utilized as a sugar carrier in protein glycosylation in the endoplasmic reticulum (ER)	GO:0000287	magnesium ion binding
EHS25_010261	1	1	0	0	0	0	0	0	0	0	0	0	0	0	0	0	0	0	Eukaryotic rRNA processing protein EBP2	GO:0005730	nucleolus
EHS25_010262	0	0	0	0	0	0	0	1	1	0	0	0	0	0	0	0	0	0	DNA-dependent RNA polymerase catalyzes the transcription of DNA into RNA using the four ribonucleoside triphosphates as substrates	GO:0004519	endonuclease activity
EHS25_010264	0	0	0	0	0	0	0	0	0	0	0	0	0	1	0	0	0	0	The coatomer is a cytosolic protein complex that binds to dilysine motifs and reversibly associates with Golgi non- clathrin-coated vesicles, which further mediate biosynthetic protein transport from the ER, via the Golgi up to the trans Golgi network. The coatomer complex is required for budding from Golgi membranes, and is essential for the retrograde Golgi-to-ER transport of dilysine-tagged pr…	GO:0005198	structural molecule activity
EHS25_010266	0	0	0	0	1	0	0	0	0	0	0	0	0	0	0	0	0	0	eIF4-gamma/eIF5/eIF2-epsilon	GO:0003743	translation initiation factor activity
EHS25_010282	0	0	0	0	0	0	0	0	0	0	0	0	0	1	0	0	0	0	Pex19 protein family	GO:0042579	microbody
EHS25_010284	0	1	1	0	0	0	0	0	0	0	0	0	0	0	0	0	0	0	DNA-dependent RNA polymerase catalyzes the transcription of DNA into RNA using the four ribonucleoside triphosphates as substrates	GO:0005515	protein binding
EHS25_010286	0	0	0	0	0	0	0	0	0	1	1	1	0	0	0	0	0	0	Belongs to the synaptobrevin family	GO:0016491	oxidoreductase activity
EHS25_010301	1	0	1	0	0	0	0	0	0	0	0	0	0	0	0	0	0	0	Pre-mRNA splicing Prp18-interacting factor	GO:0016787	hydrolase activity
EHS25_010302	0	1	1	0	0	0	0	0	0	0	0	0	0	0	0	0	0	0	Utp21 specific WD40 associated putative domain	GO:0003676	nucleic acid binding
EHS25_010305	0	0	0	0	0	0	0	0	0	1	0	0	0	0	0	0	0	0	Translation initiation factor IF-2, N-terminal region	GO:0046872	metal ion binding
